# Supplementary material for: Transcriptomic analysis reveals the regulatory module of apple (Malus × domestica) floral transition in response to 6-BA
Source: BMC Plant Biol. 2019 Mar 6;19:93. doi: 10.1186/s12870-019-1695-0 (PMC6402183; doi:10.1186/s12870-019-1695-0)
Supplement: Supplementary file 6 — Table S4. H-clustering of differentially expressed genes in control and 6-BA treatment, corresponding to Fig. 4. (XLSX 1156 kb) [file 12870_2019_1695_MOESM6_ESM.xlsx]

## Sheet: sheet1
Table S4. H-clustering of differentially expressed genes in control group，corresponding to Figure 4a.								Table S4. H-clustering of differentially expressed genes in 6-BA treatment，corresponding to Figure 4b.
ID	Cluster	C27_Log2 (ratio)	C30_Log2 (ratio)	C50_Log2 (ratio)	C70_Log2 (ratio)			ID	Cluster	C27_Log2 (ratio)	B30_Log2 (ratio)	B50_Log2 (ratio)	B70_Log2 (ratio)
MD06G1218500	1	0	-1.29269	0.148037	0.312399			MD06G1218500	1	0	0.514702	0.458296	0.602824
MD14G1215300	1	0	-0.868143	0.960983	-0.366277			MD14G1215300	1	0	0.0831059	0.556675	0.143541
MD07G1285700	1	0	-1.43887	0.342758	-0.24499			MD12G1196600	1	0	0.608397	0.807553	1.25676
MD15G1143200	1	0	-1.3337	-0.0948563	-0.512205			MD02G1294500	1	0	-0.501419	0.583307	-0.211887
MD00G1152800	1	0	-0.573527	0.632872	-0.264065			MD11G1022400	1	0	0.274853	0.595858	0.257367
MD05G1213600	1	0	-0.60838	-0.0825828	-0.263669			MD10G1273400	1	0	0.137686	0.649805	0.33371
MD09G1006900	1	0	-1.04948	0.213311	-0.258654			MD15G1084900	1	0	0.794793	1.0419	0.388067
MD01G1125200	1	0	-0.748831	0.605107	-0.528162			MD12G1190900	1	0	0.166555	0.623139	0.475377
MD05G1186200	1	0	-0.973502	0.246648	-0.474431			MD11G1242200	1	0	0.554095	0.799354	0.233411
MD09G1152300	1	0	-0.639208	0.108019	-0.999632			MD03G1066000	1	0	-1.53381	0.610636	0.0369058
MD08G1188500	1	0	-0.470977	0.0279969	-1.47343			MD17G1238500	1	0	0.747153	1.18705	0.655564
MD08G1185900	1	0	-1.02135	0.406975	-0.286823			MD07G1077900	1	0	0.552212	0.663972	0.731986
MD08G1227700	1	0	-1.20189	0.289313	-0.93805			MD09G1204200	1	0	0.204083	1.06152	0.431907
MD14G1161300	1	0	-0.248328	0.312766	-1.25188			MD08G1048900	1	0	0.582555	0.641661	1.36906
MD14G1162200	1	0	-1.16552	0.113426	0.392691			MD15G1114900	1	0	0.505134	0.86485	0.820976
MD05G1091400	1	0	-2.09053	0.212789	0.251089			MD05G1130400	1	0	-0.0824767	0.853844	0.360529
MD03G1072700	1	0	-0.421393	0.374709	-0.20717			MD15G1084800	1	0	-0.142588	0.731846	0.0199302
MD13G1090600	1	0	-1.41907	0.152336	-0.643823			MD08G1123400	1	0	-0.0569446	0.503132	0.22303
MD04G1180200	1	0	-1.61229	0.0877271	0.676194			MD05G1091400	1	0	0.48361	0.567574	0.453299
MD09G1104900	1	0	-0.462661	0.520412	-0.36884			MD10G1244200	1	0	0.662359	0.0482675	0.530385
MD11G1189200	1	0	-0.368807	7.17074e-05	-0.56919			MD04G1225400	1	0	-0.636239	1.35436	1.01211
MD14G1213800	1	0	-1.10952	0.722248	-1.14707			MD06G1201200	1	0	-0.137909	1.05048	0.711165
MD05G1352700	1	0	-0.678011	-0.0922283	-1.35704			MD13G1122100	1	0	-0.572607	0.934133	0.221484
MD14G1195400	1	0	-0.357016	0.470607	-0.520698			MD16G1206500	1	0	0.804743	0.799439	0.553198
MD09G1156300	1	0	-0.551619	0.0123966	-1.3692			MD06G1093000	1	0	0.301197	0.659795	0.501625
MD13G1191500	1	0	-1.15443	0.409451	-0.759572			MD12G1244200	1	0	0.208979	0.438157	0.14338
MD10G1068000	1	0	-1.11343	0.236168	-0.93056			MD10G1277200	1	0	0.210849	0.890939	0.291232
MD06G1012200	1	0	-2.12942	-0.0188735	-0.326187			MD05G1129500	1	0	0.409655	0.340119	0.365262
MD09G1037900	1	0	-1.06682	0.215391	0.227087			MD09G1037900	1	0	0.480447	0.133418	0.434403
MD16G1046000	1	0	-1.12967	0.174724	-0.792044			MD12G1034100	1	0	0.46461	1.18291	0.608192
MD06G1105300	1	0	-1.05831	0.571037	-0.741493			MD03G1233100	1	0	0.660188	0.179251	1.08493
MD14G1147300	1	0	-0.762563	0.283852	-0.120076			MD15G1149200	1	0	-0.149089	0.578996	0.175789
MD12G1061300	1	0	-0.527333	0.0825664	-1.30631			MD10G1301800	1	0	0.0992634	1.41247	0.817431
MD12G1218000	1	0	-0.14289	-0.285425	-0.434345			MD05G1332600	1	0	-0.0819657	0.623062	0.477699
MD03G1228500	1	0	-0.645911	0.0881569	-0.376757			MD16G1109800	1	0	0.0288066	0.679889	0.186361
MD01G1137500	1	0	-1.29511	0.23362	-0.720519			MD14G1147300	1	0	0.329748	0.362948	0.145327
MD13G1134500	1	0	-0.436227	0.578491	-0.242772			MD12G1218000	1	0	-0.518412	0.666255	-0.363594
MD14G1019000	1	0	-1.51336	0.601162	0.143449			MD01G1159400	1	0	0.408541	0.890755	1.21514
MD06G1189700	1	0	-0.467411	0.347893	-0.0823799			MD11G1203600	1	0	0.550787	0.97834	0.672152
MD08G1149200	1	0	-0.966908	0.106047	-0.490222			MD03G1080800	1	0	0.63469	0.364793	0.721537
MD05G1291600	1	0	-1.68161	0.428762	-0.439403			MD08G1070600	1	0	0.125459	0.612815	0.363536
MD16G1043500	1	0	-0.639577	-0.326991	-1.38858			MD07G1034100	1	0	0.167899	1.0236	0.750445
MD02G1174200	1	0	-0.627761	0.0676145	-0.382347			MD02G1025500	1	0	0.955546	0.766833	0.68338
MD10G1334100	1	0	-0.642458	-1.48958	-2.1824			MD14G1019000	1	0	0.594065	1.09749	0.654239
MD09G1209200	1	0	-0.87456	0.58211	-0.903427			MD06G1189700	1	0	0.147792	0.388158	0.071611
MD01G1059600	1	0	-1.05891	0.369285	-0.825734			MD13G1134600	1	0	0.489758	1.27847	0.559306
MD07G1224200	1	0	-1.29366	0.544413	0.265976			MD10G1150400	1	0	0.358421	0.482006	1.2239
MD02G1320400	1	0	-1.70837	0.0431904	-0.351257			MD11G1293500	1	0	0.987481	0.630989	1.13874
MD10G1301600	1	0	-0.452522	0.426451	-0.142996			MD03G1024200	1	0	0.568803	1.03939	0.728729
MD04G1068300	1	0	-1.0121	0.346179	0.0957553			MD07G1055800	1	0	-0.0522969	0.555856	0.534413
MD08G1092000	1	0	-1.283	0.0224409	-0.493253			MD08G1092400	1	0	0.381272	0.669178	0.245147
MD08G1148300	1	0	-1.0051	0.171528	-0.647637			MD08G1150600	1	0	0.259532	0.555301	0.822763
MD13G1098300	1	0	-0.896107	-0.233434	-1.33934			MD13G1105900	1	0	0.316564	0.578852	0.0902496
MD11G1203400	1	0	-0.444664	0.342374	-0.139822			MD08G1175700	1	0	-0.461821	0.462536	-0.159759
MD05G1134200	1	0	-1.31885	-0.0596113	-0.443268			MD11G1214100	1	0	0.534402	0.0625493	0.398247
MD06G1099000	1	0	-0.546456	-0.0034424	-0.40963			MD05G1164200	1	0	0.349615	1.00634	0.0125916
MD17G1004400	1	0	-1.44392	0.378794	-0.583442			MD03G1238600	1	0	0.332464	0.489774	0.239903
MD15G1159800	1	0	-0.962285	-0.229286	-0.225737			MD05G1223400	1	0	-0.382728	0.616438	0.0608353
MD13G1013900	1	0	-0.712457	0.0943786	-0.745927			MD10G1337700	1	0	-0.513131	0.371267	0.845153
MD09G1028600	1	0	-1.13165	0.576089	-0.939698			MD16G1015000	1	0	0.695765	1.26802	0.523421
MD15G1287800	1	0	-0.716013	-0.0860305	-0.543122			MD07G1166800	1	0	0.25016	0.64068	0.903943
MD00G1052200	1	0	-1.57911	-0.414758	0.556252			MD15G1210700	1	0	0.576029	1.09747	0.658266
MD05G1088600	1	0	-1.10207	0.310449	-0.968136			MD01G1190500	1	0	0.0504047	0.44085	0.0504667
MD05G1206900	1	0	-0.44067	0.64297	-0.525494			MD09G1256300	1	0	-0.466963	1.14557	0.424683
MD16G1220700	1	0	-1.22953	0.219868	-0.592193			MD05G1268800	1	0	0.455269	0.740039	0.135104
MD08G1005500	1	0	-0.622158	-0.43152	-0.458712			MD10G1086100	1	0	0.469324	0.0639195	0.350872
MD10G1240700	1	0	-1.43219	0.228812	-0.635745			MD17G1153200	1	0	0.312733	0.375099	0.150807
MD10G1086100	1	0	-1.69849	0.417072	-0.143642			MD07G1297100	1	0	-0.932617	1.10395	0.0784154
MD08G1109800	1	0	-1.4746	0.136213	-0.47071			MD08G1107400	1	0	0.781905	0.311824	-0.0633317
MD02G1163800	1	0	-0.704857	0.773888	-0.334683			MD02G1163800	1	0	0.978499	0.0070677	0.502678
MD02G1090200	1	0	-0.868664	0.0266492	-0.389693			MD07G1029200	1	0	-0.0635641	0.876353	0.0303056
MD10G1015300	1	0	-2.09444	-0.129261	0.0355303			MD04G1210200	1	0	0.134423	0.556909	-0.0413791
MD15G1063100	1	0	-0.480393	-0.0254902	-1.35482			MD00G1142600	1	0	0.723512	1.09517	0.667087
MD02G1295800	1	0	-0.207715	0.0328827	-0.673223			MD13G1096400	1	0	0.579934	0.462083	0.49869
MD09G1122800	1	0	-0.537434	-0.400338	-0.327641			MD02G1094900	1	0	0.650124	0.468118	0.526892
MD05G1252600	1	0	-1.9294	-0.0790566	-0.618787			MD10G1306800	1	0	-0.475236	0.921696	-0.113252
MD17G1034200	1	0	-1.00469	-0.0177401	-0.490039			MD15G1309900	1	0	-0.314841	0.320028	0.264797
MD15G1202400	1	0	-0.852553	0.379778	-1.09085			MD14G1112200	1	0	0.15683	1.40446	0.155348
MD02G1114700	1	0	-1.06466	0.401505	-0.906925			MD05G1137400	1	0	0.481643	0.193727	0.410203
MD02G1200900	1	0	-0.795822	-0.331968	-0.635559			MD06G1004700	1	0	0.650047	0.99223	0.491252
MD00G1141100	1	0	-0.336942	-0.212723	-0.430232			MD16G1050300	1	0	-0.4449	0.405362	0.46667
MD09G1006600	1	0	-0.232729	0.00592925	-0.646115			MD08G1209500	1	0	0.153586	0.509165	0.0978447
MD01G1063200	1	0	-1.72016	0.241847	0.26955			MD09G1025100	1	0	-0.0313107	1.30967	0.716812
MD06G1227800	1	0	-1.07057	-0.0553593	-0.449664			MD14G1215100	1	0	0.247909	0.22971	0.926584
MD05G1200100	1	0	-1.115	0.324503	-1.24496			MD02G1306200	1	0	0.96169	1.17076	0.463401
MD15G1216000	1	0	-1.11965	0.665839	-0.569383			MD02G1164700	1	0	0.503004	1.06213	0.445712
MD08G1207200	1	0	-0.0165117	0.199619	-0.663668			MD07G1029100	1	0	-0.231055	0.521952	0.175102
MD05G1298500	1	0	-0.695245	0.412203	-0.891044			MD10G1191800	1	0	0.484491	1.09569	0.408521
MD07G1011300	1	0	-1.37029	-0.404534	-0.0353682			MD07G1050800	1	0	0.221089	0.620723	0.408388
MD07G1050800	1	0	-1.2734	-0.0777493	0.383756			MD03G1108500	1	0	0.538051	0.132113	0.590373
MD16G1100900	1	0	-1.82072	0.0133086	0.134696			MD10G1047300	1	0	0.394017	0.298912	0.578208
MD09G1123600	1	0	-1.18018	0.219565	-0.78499			MD03G1076900	1	0	0.247607	0.433798	-0.218198
MD03G1108500	1	0	-1.67571	0.67951	-0.0943828			MD11G1037100	1	0	-0.254041	0.566951	-0.149056
MD12G1013900	1	0	-0.625109	0.46008	-0.188914			MD11G1081200	1	0	0.953178	1.24399	0.183223
MD07G1260200	1	0	-1.51804	-0.708897	-0.369323			MD08G1200800	1	0	-0.032814	0.403795	0.0122253
MD01G1166300	1	0	-0.765909	0.215973	-0.575799			MD00G1093200	1	0	-1.32073	1.14518	0.364391
MD16G1063300	1	0	-1.19186	-0.0732595	0.127274			MD17G1266000	1	0	0.610295	0.1497	-0.241606
MD01G1208800	1	0	-0.920125	0.291577	-0.670301			MD08G1041800	1	0	0.0620967	0.797614	0.401945
MD17G1201400	1	0	-0.819967	0.153821	-0.221013			MD15G1394400	1	0	-0.925966	0.459325	-0.150524
MD05G1347600	1	0	-1.48051	-0.128854	-0.38412			MD13G1113700	1	0	0.605961	0.528937	0.641346
MD17G1266000	1	0	-0.629388	0.0159288	-0.240416			MD04G1172300	1	0	0.211835	0.764417	0.440349
MD09G1281500	1	0	-1.2059	-0.130463	-0.583071			MD04G1103600	1	0	0.642846	0.506099	0.409894
MD17G1013800	1	0	-0.955003	-0.0716364	-0.0202077			MD17G1238600	1	0	0.979979	1.16827	0.987485
MD15G1163300	1	0	-1.41331	-0.586586	-0.34372			MD02G1154400	1	0	0.496786	0.713398	0.449408
MD11G1286900	1	0	-0.885339	0.143759	-1.66995			MD16G1089800	1	0	0.235655	0.620453	0.667211
MD14G1187000	1	0	-1.24294	1.39409	-0.606492			MD02G1091900	1	0	0.477086	0.256597	0.150681
MD16G1017800	1	0	-0.75032	0.0216373	-0.412267			MD09G1053700	1	0	-0.747347	0.936073	0.529078
MD11G1046300	1	0	-0.762362	0.090115	-0.552221			MD15G1002800	1	0	-0.110246	0.70228	0.0305969
MD10G1151800	1	0	-1.25844	0.468349	-0.662095			MD15G1426700	1	0	0.192885	0.658368	0.165151
MD13G1215700	1	0	-1.07636	0.206357	-0.667011			MD06G1069400	1	0	0.29259	1.15719	0.709388
MD17G1144800	1	0	-0.506236	0.229735	-1.32125			MD08G1181000	1	0	0.129119	1.4384	0.586221
MD15G1361900	1	0	-0.842804	0.17702	-0.788434			MD07G1299300	1	0	0.127468	0.723889	0.0743886
MD16G1283500	1	0	-0.479355	0.0781482	-0.534295			MD01G1010900	1	0	-0.33242	0.737604	0.403802
MD13G1178800	1	0	-1.56364	-0.839103	-0.390235			MD10G1228800	1	0	0.694744	0.710675	0.500175
MD05G1338400	1	0	-0.41026	0.172419	-0.936948			MD16G1270500	1	0	0.131436	0.585316	-0.0722644
MD02G1316400	1	0	-0.815935	0.164886	-0.16857			MD07G1228700	1	0	0.288695	0.767063	0.187297
MD16G1074000	1	0	-1.04888	-0.164948	-0.555135			MD08G1135100	1	0	0.0842029	0.727161	0.324837
MD03G1016800	1	0	-0.867198	0.395722	-0.90109			MD03G1269800	1	0	-0.637691	0.466069	-0.0616627
MD17G1244500	1	0	-1.68566	-0.14093	-0.237469			MD17G1195300	1	0	0.236278	1.28424	-0.443696
MD16G1027900	1	0	0.0259475	0.348935	-0.763367			MD13G1205600	1	0	0.401078	1.37559	0.495183
MD16G1170500	1	0	-0.882877	-0.118319	-0.367842			MD13G1030200	1	0	0.53089	0.356654	0.232861
MD15G1288400	1	0	-1.01814	-0.156482	-0.4695			MD15G1149100	1	0	-0.267784	0.580133	0.283004
MD06G1001300	1	0	-1.00301	-0.0103744	-1.62371			MD11G1183800	1	0	0.262849	1.08554	0.252541
MD13G1143800	1	0	-1.22182	0.123376	-0.201192			MD06G1116800	1	0	-0.6877	0.602036	-0.157769
MD09G1057800	1	0	-0.73563	-0.215905	-0.80913			MD09G1078700	1	0	0.484582	1.05225	0.618411
MD03G1264100	1	0	-1.00943	0.0155801	-1.70981			MD01G1222200	1	0	0.12489	0.988037	0.546206
MD13G1253000	1	0	-0.893008	-0.202873	-0.645808			MD15G1212700	1	0	0.672104	0.430094	0.462685
MD17G1181700	1	0	-0.859216	0.0308343	-0.773558			MD04G1142300	1	0	-0.836275	1.31457	0.0420727
MD01G1181100	1	0	-0.387999	-0.412772	-0.512115			MD07G1151000	1	0	0.975052	1.11854	0.982324
MD16G1139200	1	0	-0.936705	0.0279229	-0.64752			MD02G1253600	1	0	0.342326	0.416471	-0.0575392
MD17G1141600	1	0	-0.137154	0.243304	-0.631982			MD04G1234500	1	0	0.00548264	0.294345	1.0786
MD06G1069400	1	0	-1.2585	0.638664	0.277973			MD09G1078900	1	0	-1.05243	1.07628	0.756006
MD10G1160200	1	0	-0.567069	0.655376	-0.365383			MD09G1234800	1	0	0.40276	0.505647	0.658963
MD13G1216600	1	0	-0.818914	0.141946	-0.562862			MD05G1236900	1	0	0.314958	0.936242	0.405254
MD05G1191900	1	0	-1.05853	0.286589	-0.391437			MD09G1056500	1	0	0.361512	0.503229	0.218443
MD03G1047900	1	0	-0.872069	-0.489481	-0.127385			MD07G1125700	1	0	-0.115045	0.83377	-0.00137209
MD05G1272900	1	0	-0.672834	-0.289861	-1.23154			MD16G1042400	1	0	-0.213484	0.508571	-0.165425
MD14G1142800	1	0	-0.0843722	-0.0321042	-0.838461			MD15G1102100	1	0	-0.108784	0.601698	-0.106143
MD13G1072300	1	0	-0.922095	0.411537	-0.642511			MD15G1155700	1	0	0.330193	1.09801	0.737736
MD12G1124200	1	0	-1.13855	0.359006	-1.32896			MD14G1197400	1	0	-0.163731	0.937643	0.306781
MD10G1142200	1	0	-0.855969	0.0491484	-0.349496			MD07G1245000	1	0	-0.302543	0.494847	0.453491
MD15G1353800	1	0	-1.36096	0.596209	-0.685597			MD13G1120100	1	0	0.309803	0.990963	0.652233
MD03G1058400	1	0	-0.95211	0.309448	0.0726062			MD12G1199100	1	0	-0.124048	0.792878	0.359061
MD13G1030200	1	0	-0.835288	0.364663	-0.300037			MD12G1202800	1	0	0.0649404	0.761308	-0.0279111
MD16G1197300	1	0	-0.669973	0.250551	-0.495893			MD07G1244000	1	0	-0.103336	0.588389	0.29521
MD06G1236400	1	0	-1.01136	0.569065	-0.327608			MD16G1285900	1	0	0.574769	-0.145048	0.77357
MD16G1195700	1	0	-0.586188	0.142953	-0.464409			MD13G1009400	1	0	0.263177	1.05779	0.34016
MD07G1135600	1	0	-1.44513	0.0836674	-0.456674			MD05G1340300	1	0	0.230791	1.32199	0.38867
MD13G1231400	1	0	-0.852331	0.815237	-0.187187			MD02G1097900	1	0	0.23105	0.921174	0.720522
MD02G1026800	1	0	-1.06797	0.620495	-0.412898			MD14G1170300	1	0	-0.251034	0.684948	0.577438
MD02G1181000	1	0	-1.1862	0.233305	-0.734543			MD07G1097000	1	0	0.528471	1.0432	0.701845
MD13G1241400	1	0	-1.04627	0.54994	-0.859138			MD15G1373200	1	0	-0.433832	0.416717	-0.0197325
MD00G1119400	1	0	-0.805231	0.231189	-0.375486			MD10G1004700	1	0	0.573909	0.221643	0.152528
MD02G1068500	1	0	-0.183571	-0.0650529	-0.759405			MD14G1008700	1	0	0.291204	0.501936	0.46312
MD06G1209400	1	0	-0.640865	0.150648	-0.631868			MD02G1081200	1	0	0.508742	0.456394	0.675979
MD05G1203500	1	0	-0.248473	0.171077	-0.757913			MD16G1038000	1	0	0.491768	0.432142	0.829054
MD05G1132300	1	0	-1.55462	0.889184	-0.336723			MD01G1177200	1	0	-0.324869	1.36392	-0.358952
MD12G1129100	1	0	-1.07199	-0.148997	-0.042378			MD05G1256200	1	0	0.523033	0.891454	-0.0312844
MD01G1028700	1	0	-0.859917	-0.259667	-0.0805966			MD02G1084700	1	0	0.0882278	0.695425	-0.090952
MD15G1212700	1	0	-1.21574	0.593432	0.0669251			MD04G1227500	1	0	-0.00426474	0.489248	0.24763
MD13G1109600	1	0	-0.973782	0.247144	-0.473599			MD08G1052900	1	0	0.146753	0.512946	0.188981
MD13G1129000	1	0	-0.87838	0.384553	-0.016713			MD05G1126300	1	0	0.337876	0.589175	0.0375546
MD01G1128000	1	0	-0.890438	0.164741	-0.7692			MD08G1219200	1	0	-0.00500826	0.964185	0.840058
MD15G1317500	1	0	-0.795374	0.706786	-0.598058			MD11G1173800	1	0	0.697112	1.22003	0.318474
MD04G1182200	1	0	-0.560929	0.100036	-0.472453			MD07G1259300	1	0	0.229418	1.22196	0.547149
MD08G1073000	1	0	-0.975887	0.00837856	-0.018518			MD02G1109800	1	0	-0.160513	0.344471	0.00924898
MD08G1093800	1	0	-0.815751	0.199818	-0.601164			MD07G1243500	1	0	-0.0550209	0.551937	0.220459
MD16G1118900	1	0	-0.639249	-0.220687	-0.318567			MD01G1105800	1	0	0.46923	0.984881	0.49563
MD06G1058600	1	0	-1.28511	-0.21564	-0.421168			MD16G1161100	1	0	0.0419022	1.47105	-0.0842513
MD08G1076400	1	0	-1.1464	0.371989	-0.286587			MD06G1084400	1	0	0.51688	0.77872	0.0338261
MD09G1190900	1	0	-0.670473	-0.193688	-0.591085			MD07G1082700	1	0	0.28572	1.00765	0.403751
MD06G1174200	1	0	-0.581079	0.128333	-0.825876			MD00G1021700	1	0	0.598956	0.939186	0.478695
MD16G1206000	1	0	-1.01332	0.333015	-0.548104			MD16G1050200	1	0	-0.901291	1.07642	0.360029
MD09G1209300	1	0	-0.509058	0.687004	-1.32251			MD07G1080200	1	0	0.541812	0.309295	0.0250342
MD04G1008900	1	0	-1.27557	0.0641441	0.0911617			MD01G1226600	1	0	-0.161982	0.618924	0.314635
MD12G1237500	1	0	-0.551581	-0.0075905	-0.318382			MD15G1421600	1	0	0.25998	0.643629	0.11898
MD17G1274300	1	0	-1.92311	-0.173966	-0.279132			MD06G1222800	1	0	0.804047	0.770241	0.555215
MD16G1102200	1	0	-1.6766	0.0434132	-0.536833			MD03G1170700	1	0	0.454247	1.0751	0.614498
MD11G1082500	1	0	-0.88159	0.360693	-0.641401			MD02G1070200	1	0	-0.0276967	0.654259	0.251786
MD15G1223600	1	0	-0.743973	-0.236933	-0.440906			MD14G1195800	1	0	0.309338	0.959152	0.0671059
MD16G1230700	1	0	-1.03003	0.55283	-0.220872			MD02G1112800	1	0	0.220495	0.625877	0.555189
MD08G1162000	1	0	-1.36941	-0.153638	-0.485714			MD08G1045100	1	0	0.386723	0.916694	-0.0476968
MD03G1295400	1	0	-0.493239	0.527277	-0.541879			MD16G1141600	1	0	0.65004	0.454211	1.75222
MD14G1039900	1	0	-0.621567	0.799362	-0.629972			MD06G1039200	1	0	-0.213409	1.18278	0.530346
MD12G1204700	1	0	-0.957284	0.0903014	-0.348425			MD11G1227600	1	0	0.490424	0.296663	1.64041
MD13G1099500	1	0	-0.841721	0.161973	-0.262345			MD13G1161600	1	0	0.415967	1.54044	0.592166
MD12G1093800	1	0	-0.860046	0.0215783	-0.778077			MD14G1125900	1	0	0.106453	1.13987	0.43096
MD15G1439900	1	0	-1.20709	0.58146	-0.848399			MD15G1427000	1	0	0.0794142	1.07274	0.363399
MD07G1142700	1	0	-1.13364	0.230037	-0.618703			MD06G1198600	1	0	0.285104	0.907351	0.267894
MD03G1212900	1	0	-0.798635	0.264707	-0.648418			MD02G1001900	1	0	0.827396	1.26486	0.35954
MD16G1285900	1	0	-1.0956	0.439883	-0.0955385			MD10G1187800	1	0	0.166424	0.625194	0.307061
MD09G1250900	1	0	-1.47265	-1.07345	-0.116872			MD13G1160900	1	0	-0.014196	1.8249	0.149696
MD16G1265300	1	0	-1.42596	-0.162743	-0.485145			MD03G1160600	1	0	0.939212	1.1256	0.871169
MD12G1262300	1	0	-0.80911	0.583897	-0.50844			MD15G1048800	1	0	0.516523	1.05766	0.0901976
MD13G1244500	1	0	-0.571705	-0.0658555	-0.518571			MD10G1073900	1	0	0.314079	0.657361	0.176759
MD14G1170300	1	0	-1.08891	0.248489	0.253208			MD11G1085000	1	0	0.612278	1.17391	0.404945
MD10G1004700	1	0	-0.581271	0.570727	-0.260936			MD15G1439800	1	0	0.776117	0.328826	2.0234
MD03G1098100	1	0	-0.71898	-0.222714	-1.23592			MD01G1154500	1	0	0.37273	0.513442	1.3841
MD09G1075500	1	0	-0.925294	0.314827	-0.578037			MD06G1094500	1	0	0.787442	0.75916	0.103123
MD10G1089900	1	0	-1.01619	0.217032	-0.608589			MD05G1169300	1	0	0.439162	0.928227	0.731645
MD15G1113600	1	0	-2.07886	0.0457071	-0.580347			MD09G1097300	1	0	0.513836	0.317089	0.367159
MD12G1155100	1	0	-0.314086	0.334859	-0.68848			MD05G1229500	1	0	0.332709	1.11006	0.539768
MD06G1240300	1	0	-1.09361	0.232513	-0.97486			MD15G1269500	1	0	-0.445278	0.478983	0.0640994
MD02G1081200	1	0	-0.708547	0.835848	-0.263903			MD01G1228100	1	0	0.487778	1.13189	0.319207
MD09G1113700	1	0	-0.993269	0.0938629	-0.132604			MD09G1271200	1	0	0.591463	0.0812983	0.724609
MD00G1020300	1	0	-1.52259	0.0274842	0.364121			MD10G1150600	1	0	-0.132878	0.349337	0.243372
MD04G1235700	1	0	-1.7064	0.0907572	-0.361281			MD02G1319500	1	0	0.554397	-0.117661	0.492299
MD14G1057700	1	0	-0.695342	0.0375482	-0.39226			MD06G1204700	1	0	0.142457	0.707408	0.341212
MD00G1023000	1	0	-1.14859	0.390383	-0.290602			MD01G1238700	1	0	-0.300478	1.71394	0.791797
MD09G1112100	1	0	-1.02936	0.0287376	-0.780962			MD10G1058000	1	0	0.875007	0.424468	0.938289
MD14G1195300	1	0	-0.604681	0.336664	-0.582546			MD07G1053200	1	0	0.474599	0.798808	0.44122
MD02G1119100	1	0	-1.15735	0.122391	-0.689954			MD06G1209100	1	0	0.605132	0.448789	0.612479
MD05G1126300	1	0	-0.681346	0.644991	-0.413985			MD05G1013200	1	0	0.314737	0.823111	-0.0869063
MD02G1048700	1	0	-1.33787	-0.0607036	-0.0953802			MD10G1014800	1	0	-0.322068	0.460096	0.683924
MD15G1302900	1	0	-0.363697	-1.16702	-1.84841			MD02G1082200	1	0	0.692991	0.647758	0.265295
MD06G1073500	1	0	-0.998055	0.288267	-0.299069			MD07G1295700	1	0	0.474627	0.673043	0.40737
MD03G1205300	1	0	-0.385395	0.401189	-0.516949			MD16G1057500	1	0	0.651635	1.32203	0.166184
MD08G1185800	1	0	-0.860077	0.475094	-0.295497			MD15G1326800	1	0	0.170544	1.02741	0.17173
MD15G1205300	1	0	-1.8093	-0.470188	0.0529305			MD10G1214300	1	0	-0.196852	0.86323	0.0737025
MD15G1068200	1	0	-0.944403	0.525206	-0.618329			MD10G1310500	1	0	0.669093	0.981493	-0.0577193
MD03G1166800	1	0	-1.31837	0.342879	-0.51265			MD16G1164800	1	0	0.757392	0.393833	0.460053
MD04G1060200	1	0	0.0734135	-0.0218799	-1.37291			MD13G1217400	1	0	0.248361	1.09935	0.0407019
MD14G1239500	1	0	-0.747604	-0.0661346	-1.29303			MD10G1304100	1	0	0.416164	0.770418	0.148928
MD08G1037600	1	0	-0.810318	1.11772	-1.08507			MD15G1049400	1	0	0.60841	1.19248	0.439232
MD11G1116300	1	0	-0.455397	0.398131	-0.120074			MD09G1109300	1	0	0.110042	0.3573	0.0330314
MD10G1076500	1	0	-0.0691226	-0.0604517	-1.21487			MD05G1210700	1	0	0.520056	0.816416	-0.170014
MD09G1099500	1	0	-1.25826	0.290494	-0.802919			MD09G1042800	1	0	0.444919	0.51304	0.576594
MD16G1225200	1	0	-0.905094	0.381215	-1.28493			MD02G1199000	1	0	0.580033	1.38666	-0.110862
MD02G1202000	1	0	-0.745213	-0.00833835	-1.6669			MD02G1199100	1	0	0.465588	1.37299	0.255614
MD00G1142400	1	0	-0.698348	0.0731446	-0.715819			MD07G1133800	1	0	0.358269	1.20553	0.50119
MD06G1191500	1	0	-1.24951	0.200232	-0.635607			MD09G1016600	1	0	0.395399	1.49062	0.23368
MD03G1264600	1	0	-1.19434	0.366579	0.208915			MD14G1038200	1	0	0.419601	0.447065	0.735798
MD12G1017400	1	0	-1.68715	-0.06914	-0.501711			MD17G1127700	1	0	-0.15976	1.06665	0.188271
MD03G1277000	1	0	-0.810383	-0.0688657	-0.484776			MD00G1010000	1	0	0.29995	0.555041	0.413741
MD06G1222800	1	0	-0.682466	0.839685	-0.235115			MD14G1170200	1	0	0.0408958	0.589961	0.212155
MD16G1240500	1	0	-0.853769	0.126155	-0.538771			MD16G1097600	1	0	-0.163993	0.677825	0.613215
MD09G1133200	1	0	-1.60584	0.183904	-0.337274			MD03G1071300	1	0	-0.119666	0.402291	0.117513
MD13G1191200	1	0	-0.613595	-0.189916	-0.602018			MD09G1270800	1	0	-0.3647	0.662337	-0.260851
MD05G1112300	1	0	-0.579701	-0.0350917	-0.430646			MD15G1317700	1	0	1.02211	0.0675876	-0.00558941
MD15G1157500	1	0	-1.11986	0.356764	-0.823644			MD14G1219500	1	0	0.285825	0.633316	0.218836
MD02G1256500	1	0	-1.291	0.0280855	-0.164175			MD15G1073600	1	0	0.102738	0.834556	0.533633
MD07G1145800	1	0	-0.886198	0.296095	-0.405717			MD11G1306500	1	0	1.05686	0.810423	-0.393988
MD02G1185900	1	0	-0.549983	0.552446	-0.727916			MD03G1111000	1	0	0.638306	0.943663	0.0322473
MD16G1141800	1	0	-0.942496	0.0645624	-0.769079			MD10G1044900	1	0	0.506644	-0.0433519	0.537052
MD13G1140600	1	0	-0.686665	0.340339	-0.51107			MD02G1274000	1	0	0.396481	0.896633	0.608978
MD05G1334300	1	0	-1.48423	0.562452	-0.572043			MD15G1164000	1	0	0.653212	0.852752	0.664324
MD05G1134100	1	0	-1.16969	0.0355094	-0.45229			MD12G1148500	1	0	0.80423	0.351865	1.14281
MD05G1241900	1	0	-0.513573	0.0840533	-0.43608			MD13G1010700	1	0	0.3518	0.512315	0.397685
MD09G1091000	1	0	-0.609066	0.227701	-0.377225			MD14G1115500	1	0	0.345816	0.316215	1.14024
MD12G1057900	1	0	-0.987171	0.149488	-0.802413			MD13G1023400	1	0	0.145995	0.589986	0.00647961
MD08G1126200	1	0	-0.698079	0.5414	-1.04334			MD15G1039300	1	0	0.696493	1.35958	0.510394
MD16G1254000	1	0	-0.538433	0.220699	-1.04632			MD05G1028900	1	0	-0.308968	0.972565	0.38222
MD17G1018600	1	0	-0.549378	-0.232315	-0.454264			MD09G1222600	1	0	0.137384	0.555514	-0.119599
MD07G1009400	1	0	-0.587828	0.290046	-0.408402			MD13G1019300	1	0	0.599207	0.15618	-0.162523
MD09G1097300	1	0	-1.06296	0.465007	-0.0570672			MD12G1157200	1	0	0.306514	0.743246	0.883431
MD14G1084400	1	0	-1.13622	0.223172	-0.69259			MD17G1240300	1	0	0.697553	0.358065	0.754715
MD03G1081200	1	0	-0.772047	0.20688	-1.45659			MD07G1251300	1	0	-0.0662498	0.353528	0.245605
MD06G1086100	1	0	-1.48956	0.00358904	0.0965166			MD02G1132400	1	0	0.461436	0.847323	0.69957
MD12G1026900	1	0	-0.76932	0.36063	-0.163429			MD09G1080200	1	0	0.103586	0.827329	0.593371
MD15G1310000	1	0	0.0639292	0.187529	-0.86644			MD03G1208300	1	0	0.0642632	0.563128	0.193854
MD05G1186700	1	0	-0.67622	0.243	-0.332809			MD15G1070300	1	0	-0.314726	0.292907	0.378284
MD06G1209100	1	0	-0.718281	0.964342	-0.0890563			MD00G1166700	1	0	-0.130282	0.313413	0.0606271
MD08G1178000	1	0	-1.12211	1.0051	-0.875218			MD08G1052300	1	0	0.316751	0.74732	0.564075
MD13G1121900	1	0	-0.979255	0.36574	-0.494675			MD13G1039200	1	0	0.49814	0.891188	0.616016
MD07G1219100	1	0	-0.924154	0.0631264	-0.467149			MD01G1213700	1	0	0.264702	1.40517	0.267735
MD08G1222300	1	0	-0.564127	0.0978006	-0.696551			MD13G1134100	1	0	0.833047	0.185694	-0.120749
MD02G1254900	1	0	-1.08518	0.712239	-0.697257			MD14G1214100	1	0	0.121312	0.642622	0.222742
MD09G1090700	1	0	-1.44639	0.542164	-0.336212			MD15G1363500	1	0	0.495663	0.48828	0.377962
MD15G1077800	1	0	-0.89211	0.294275	-0.494628			MD16G1031000	1	0	-0.339989	0.596821	-0.339648
MD15G1179700	1	0	-1.59564	-0.128901	-0.186917			MD05G1337700	1	0	0.466145	0.66401	0.407195
MD03G1292600	1	0	-0.716587	0.22446	-0.704186			MD02G1278900	1	0	-0.0258531	0.58722	0.0131444
MD01G1208300	1	0	-1.04371	-0.106799	-0.430354			MD00G1104700	1	0	-0.697662	1.22779	0.29455
MD16G1164800	1	0	-0.875856	1.06836	-0.0806839			MD05G1349800	1	0	0.550046	0.0681189	0.391224
MD08G1093300	1	0	-0.742663	-0.225082	-1.1768			MD04G1111700	1	0	-0.216827	0.526021	0.172527
MD11G1309400	1	0	-0.886027	0.115518	-0.475398			MD10G1062200	1	0	0.251939	0.858265	0.210466
MD13G1072100	1	0	-1.45226	0.307219	-0.457606			MD02G1318100	1	0	0.364039	0.478002	0.616323
MD08G1104000	1	0	-1.42017	0.59215	-0.681733			MD07G1051300	1	0	0.68539	1.44674	0.0754331
MD03G1214000	1	0	-0.184286	-0.166361	-0.563682			MD00G1129500	1	0	0.13025	0.956415	0.218602
MD07G1135000	1	0	-1.12677	-0.206152	-0.52928			MD10G1284100	1	0	0.138126	1.15986	0.147795
MD06G1010900	1	0	-1.75882	0.388312	-0.249195			MD12G1057600	1	0	1.21795	1.23524	0.695664
MD08G1081300	1	0	-1.3346	0.19245	-0.27554			MD00G1021800	1	0	0.173867	0.848806	0.329069
MD15G1407200	1	0	-1.52593	0.226683	-0.493321			MD09G1184600	1	0	-0.00274167	0.962208	0.228942
MD10G1063500	1	0	-1.75001	0.0786914	-0.689928			MD04G1222400	1	0	0.17195	1.4967	0.283755
MD16G1020900	1	0	-0.765796	0.264674	-0.521642			MD13G1118300	1	0	0.714161	1.10746	0.293737
MD11G1084800	1	0	-0.427215	0.107267	-1.53897			MD06G1090100	1	0	0.429449	0.970959	0.702657
MD16G1173100	1	0	-0.620049	0.752841	-0.396947			MD05G1100200	1	0	0.510827	0.971144	0.389238
MD13G1047200	1	0	-0.745788	0.160588	-0.753219			MD06G1014100	1	0	0.542061	0.437051	0.203204
MD14G1036000	1	0	-0.686572	0.00521038	-1.00587			MD05G1082600	1	0	0.757642	0.977371	0.808027
MD17G1001400	1	0	-1.54118	0.405882	-0.289854			MD05G1063300	1	0	0.114756	0.723599	0.373896
MD00G1053300	1	0	-0.450104	0.537522	-0.212687			MD13G1050100	1	0	0.295761	0.356465	1.31224
MD06G1143700	1	0	-1.7676	-0.091643	-0.572773			MD00G1021500	1	0	0.197339	0.731038	0.34804
MD05G1238500	1	0	-0.69596	0.000757337	-0.756151			MD04G1244300	1	0	0.174204	0.162961	1.56262
MD11G1003100	1	0	-0.87853	0.195519	-0.667789			MD07G1167100	1	0	0.543278	0.319434	-0.162374
MD00G1085100	1	0	-0.579566	0.541518	-0.187442			MD09G1153800	1	0	0.420237	0.710305	0.386725
MD07G1084500	1	0	-1.31213	0.605092	-0.462032			MD16G1218600	1	0	-0.263824	0.375102	0.069111
MD01G1077000	1	0	-1.12177	0.216438	-0.835202			MD15G1265500	1	0	0.213186	0.941458	0.290326
MD09G1014800	1	0	-0.365027	-0.29664	-0.326896			MD12G1158800	1	0	0.500751	1.19082	0.194811
MD17G1258100	1	0	-1.73382	-0.360515	-0.222439			MD14G1197600	1	0	-0.523562	0.580346	1.21138
MD10G1049000	1	0	-0.528033	-0.127821	-1.21093			MD12G1030500	1	0	0.85401	0.76612	0.324284
MD15G1025900	1	0	-1.13023	0.301184	-0.20102			MD07G1056000	1	0	0.0616558	0.447747	0.223079
MD06G1185600	1	0	-1.01894	0.479886	-0.635532			MD12G1241500	1	0	0.328338	0.644502	0.559989
MD04G1039600	1	0	-1.93013	-0.0998485	-0.411337			MD17G1017500	1	0	0.300623	0.769368	-0.0134328
MD13G1148300	1	0	-1.5363	0.493821	0.074263			MD11G1275900	1	0	0.600689	0.736285	0.586987
MD02G1039600	1	0	-1.55942	0.77412	-0.149892			MD13G1019100	1	0	0.141797	0.640277	-0.138347
MD03G1111000	1	0	-0.500225	0.810169	-0.212646			MD07G1244700	1	0	0.188084	0.708216	0.374938
MD09G1207000	1	0	-0.605195	0.410266	-0.312777			MD15G1296800	1	0	-0.275095	0.277378	0.508245
MD14G1097800	1	0	-0.845836	0.173123	-0.537875			MD11G1213700	1	0	0.767143	1.10459	0.516644
MD11G1108700	1	0	-1.55833	0.404985	-0.947334			MD03G1060100	1	0	0.709625	0.719789	0.7661
MD09G1193500	1	0	-0.878158	0.0747364	-0.32618			MD16G1255400	1	0	0.326795	0.479283	0.364826
MD05G1263800	1	0	-0.997216	-0.176035	-0.652833			MD03G1086800	1	0	0.397707	0.713832	0.245188
MD09G1110500	1	0	-0.68746	0.488577	-0.587623			MD04G1098900	1	0	-0.13952	0.724114	0.0102126
MD10G1044900	1	0	-0.538065	0.604157	-0.353948			MD15G1426900	1	0	-0.257892	0.577208	0.299406
MD05G1309400	1	0	-1.48942	0.521488	-0.511025			MD14G1008300	1	0	0.321652	0.673162	0.483542
MD03G1141800	1	0	-0.93696	0.245002	-0.137304			MD02G1249500	1	0	-0.0371199	0.74013	0.309598
MD11G1080300	1	0	-1.01626	0.802987	-0.276645			MD09G1236700	1	0	0.462679	1.47022	0.479821
MD12G1148500	1	0	-0.965632	1.13902	0.011816			MD02G1065600	1	0	0.440664	0.397685	0.581818
MD03G1111500	1	0	-0.496408	-0.0612938	-1.1493			MD12G1150700	1	0	-0.0437178	0.801959	0.301848
MD15G1036800	1	0	-1.34436	0.552727	-0.834379			MD03G1190300	1	0	-0.284072	0.494227	0.145427
MD05G1060000	1	0	-0.578284	0.0698306	-0.456157			MD01G1106200	1	0	0.5202	0.338735	0.392772
MD01G1092900	1	0	-1.19102	0.316401	-1.38455			MD15G1278600	1	0	1.05598	1.2752	-0.403471
MD04G1000500	1	0	-1.07925	0.439499	-1.14265			MD08G1229600	1	0	-0.0130864	0.901541	0.609052
MD10G1021000	1	0	-1.59775	-0.263308	0.332376			MD03G1185400	1	0	0.333884	0.90157	0.449848
MD05G1288800	1	0	-1.39456	-0.298154	-0.310235			MD11G1030900	1	0	0.0860264	0.415299	0.129632
MD10G1320600	1	0	-1.37977	-0.197201	-0.517196			MD02G1046400	1	0	-0.132418	0.518777	-0.0622948
MD07G1256200	1	0	-0.569675	-0.125331	-0.261401			MD12G1264000	1	0	0.25365	0.724947	0.458876
MD12G1252700	1	0	-0.929891	0.439158	-0.125985			MD10G1307500	1	0	0.0830585	0.611492	0.350503
MD02G1043500	1	0	-0.439268	0.42856	-0.475922			MD09G1017500	1	0	0.0702074	0.741678	0.239671
MD16G1241800	1	0	-1.17857	0.483234	-0.983343			MD09G1248700	1	0	0.19583	0.74387	0.549604
MD17G1275000	1	0	-1.2244	-0.345136	0.109578			MD02G1045800	1	0	0.530307	0.370635	0.487297
MD02G1260100	1	0	-1.2562	0.0769904	0.00532335			MD08G1235100	1	0	0.366208	1.06457	0.553224
MD06G1122100	1	0	-1.21941	0.141802	0.209534			MD12G1163400	1	0	0.17509	0.79249	-0.117388
MD15G1016500	1	0	-1.3343	0.39179	-0.445038			MD17G1173100	1	0	-0.0121345	0.662833	0.148186
MD16G1110200	1	0	-0.593567	0.111682	-0.757363			MD06G1012500	1	0	0.710167	0.253911	0.296696
MD04G1167200	1	0	-1.19091	0.0903378	0.0644054			MD08G1219800	1	0	0.31543	0.660076	0.801351
MD13G1109700	1	0	-0.780275	0.205891	-0.730329			MD11G1079900	1	0	0.146946	0.784904	0.293065
MD01G1037500	1	0	-1.38836	0.192491	-0.679174			MD02G1266500	1	0	0.536565	0.259058	-0.103855
MD15G1363500	1	0	-1.03924	1.10019	-0.297605			MD04G1228800	1	0	0.02398	0.613016	0.0147672
MD13G1096700	1	0	-0.991298	0.55523	-0.969134			MD11G1056100	1	0	0.260008	0.715672	0.247125
MD14G1186000	1	0	-0.948443	0.221564	-0.392639			MD06G1199000	1	0	0.143945	0.399268	0.175327
MD13G1091800	1	0	-0.708307	-0.0305279	-0.322246			MD00G1019900	1	0	0.194569	0.417909	0.164346
MD03G1296900	1	0	-1.54432	0.343654	-0.553879			MD01G1027700	1	0	0.0304646	0.452301	0.235369
MD03G1258700	1	0	-0.362579	0.294857	-0.538667			MD12G1131500	1	0	-0.190723	0.395975	0.121897
MD08G1163100	1	0	-1.09213	0.127976	-0.258649			MD14G1137200	1	0	0.889023	1.34294	0.470353
MD08G1230300	1	0	-1.60959	-0.294956	-0.267991			MD15G1323700	1	0	0.0166594	0.758409	0.124785
MD01G1187600	1	0	-1.04741	0.0948799	-0.104397			MD12G1251000	1	0	0.13764	0.673476	-0.0555088
MD11G1139700	1	0	-1.24253	0.0852455	-0.440636			MD09G1146600	1	0	0.485917	0.305735	0.489755
MD00G1200300	1	0	-0.689812	0.332386	-0.843184			MD00G1080200	1	0	0.0201051	0.670983	0.125404
MD07G1235500	1	0	-0.777852	0.918055	-0.330742			MD06G1100300	1	0	0.138812	0.699545	0.0431931
MD17G1242500	1	0	-1.69134	-0.378882	-0.0811602			MD09G1169300	1	0	0.0294589	0.657913	0.660779
MD17G1135600	1	0	-1.47856	0.8738	-0.797028			MD00G1190900	1	0	0.181733	0.46434	0.0684029
MD15G1109200	1	0	-0.981119	0.494768	-0.776565			MD04G1067800	1	0	0.624891	0.193791	1.13088
MD07G1103700	1	0	-0.809713	0.0476847	-0.77585			MD03G1149700	1	0	0.178989	0.537853	-0.105183
MD02G1009300	1	0	-1.50407	0.136867	-0.660059			MD05G1242300	1	0	-0.732435	0.785329	0.346225
MD10G1248900	1	0	-1.55188	-0.239709	0.425178			MD05G1242100	1	0	0.102606	0.94014	0.354618
MD03G1161000	1	0	-0.67735	0.00410606	-0.76338			MD05G1287000	1	0	0.647249	0.127901	-0.158704
MD10G1208800	1	0	-1.45514	0.0605418	0.198546			MD12G1150100	1	0	0.489914	0.960191	0.413054
MD09G1042500	1	0	-1.14807	-0.107484	-0.465513			MD03G1277600	1	0	0.382375	0.613692	-0.202272
MD11G1296900	1	0	-1.02732	0.29181	-0.517966			MD03G1166500	1	0	-0.0319817	0.749476	0.10563
MD04G1130500	1	0	-0.88103	0.165285	-0.349391			MD09G1236600	1	0	0.0703166	0.715139	0.759339
MD01G1064800	1	0	-0.630823	0.124988	-0.319448			MD12G1099700	1	0	-0.0319441	0.577684	0.0107959
MD03G1205900	1	0	-1.91316	0.225261	-0.313837			MD02G1250000	1	0	0.554979	0.729743	-0.0630183
MD16G1008100	1	0	-1.08035	0.109523	-1.31533			MD10G1255300	1	0	0.44788	0.385637	-0.156008
MD12G1146600	1	0	-0.65012	0.268571	-0.556435			MD13G1045900	1	0	0.619958	1.33161	0.548664
MD10G1313800	1	0	-0.570787	0.39616	-0.237745			MD04G1022000	1	0	0.500332	1.06744	0.429368
MD06G1102600	1	0	-0.509146	0.112817	-0.472159			MD01G1191700	1	0	0.714665	0.817635	-0.0218734
MD05G1324500	1	0	-1.20313	0.117696	-0.298221			MD07G1097300	1	0	0.740329	1.09439	0.660233
MD13G1280800	1	0	-0.963361	0.0486669	-0.716035			MD03G1281500	1	0	0.00206101	0.850739	0.00881466
MD17G1000600	1	0	-0.68779	-0.0561173	-0.456333			MD05G1039500	1	0	0.463268	0.196541	0.68034
MD03G1044400	1	0	-0.80222	0.508728	-0.205503			MD03G1103100	1	0	0.630577	0.331975	0.632965
MD09G1132600	1	0	-1.13058	-0.100503	-0.247378			MD12G1158600	1	0	-0.0761012	0.476083	0.347539
MD09G1274500	1	0	-1.33112	-0.378185	-0.0446487			MD08G1131100	1	0	0.384698	0.914498	0.13501
MD16G1011500	1	0	-1.16317	-0.153917	-0.601459			MD10G1326000	1	0	0.158417	0.830949	0.169972
MD17G1230800	1	0	-0.813517	0.088337	-0.629815			MD17G1249500	1	0	0.190194	0.674133	0.473178
MD01G1060900	1	0	-0.664539	0.471762	-0.397975			MD07G1242400	1	0	-0.492867	0.457575	-0.0449658
MD06G1095200	1	0	-0.616746	0.210368	-0.458155			MD05G1041000	1	0	0.427294	0.629613	0.824201
MD10G1153800	1	0	-0.793718	0.990674	-0.650947			MD00G1130900	1	0	-0.575499	0.672118	0.228357
MD02G1114900	1	0	-1.32382	0.23667	-0.352627			MD12G1066700	1	0	0.319837	0.724919	0.301891
MD00G1105700	1	0	-1.94415	0.53062	-0.206634			MD07G1051100	1	0	-0.853258	0.648696	0.586964
MD05G1364100	1	0	-1.03084	-0.045246	-0.619876			MD10G1279600	1	0	-0.206344	0.622315	-0.0453765
MD11G1068000	1	0	-0.433812	0.00345503	-1.02013			MD07G1270900	1	0	-0.179813	0.681341	0.035421
MD05G1260400	1	0	-1.57438	-0.085292	-0.0281006			MD00G1180200	1	0	-0.0288096	0.749689	0.0739778
MD08G1117200	1	0	-0.631134	-0.23316	-1.27305			MD16G1069500	1	0	-0.531579	1.25715	0.803812
MD15G1024300	1	0	-0.879401	0.129927	-0.399906			MD17G1086200	1	0	0.389232	1.54003	0.440306
MD05G1188700	1	0	-0.609638	-0.0322097	-0.53217			MD10G1278700	1	0	0.504148	0.526169	1.29106
MD04G1203200	1	0	-0.488166	0.253972	-0.532444			MD17G1070400	1	0	-0.0183881	0.681805	0.580405
MD16G1248400	1	0	-0.740901	0.264996	-0.644932			MD13G1082500	1	0	0.407855	0.432031	-0.164396
MD12G1241500	1	0	-1.68423	0.27962	0.456667			MD12G1028500	1	0	-0.285283	0.753775	0.485746
MD10G1320700	1	0	-1.29238	-0.195122	-0.385927			MD13G1082200	1	0	0.501505	0.876919	0.164179
MD14G1008000	1	0	-0.889028	0.124976	-0.66109			MD01G1079600	1	0	0.492586	0.0211879	0.538657
MD07G1233200	1	0	-0.0406972	-0.113862	-0.863971			MD07G1057100	1	0	0.2894	0.710674	0.538067
MD15G1312200	1	0	-1.19415	0.195387	-0.560429			MD17G1082000	1	0	-0.217801	0.317633	0.452177
MD12G1260600	1	0	-0.858609	0.119275	-0.513685			MD04G1176100	1	0	0.396192	0.95297	0.27327
MD17G1285300	1	0	-0.902519	0.105813	-0.525265			MD17G1087200	1	0	0.541941	0.72129	1.08133
MD10G1295000	1	0	-1.00221	0.248233	-1.26092			MD00G1054500	1	0	0.347642	0.710912	0.273514
MD02G1174100	1	0	-1.00527	0.58562	-0.453895			MD04G1224400	1	0	-0.274451	1.5309	0.737826
MD08G1013300	1	0	-0.492205	0.31306	-0.639884			MD12G1021000	1	0	0.114437	0.334791	1.04194
MD05G1101500	1	0	-0.865987	-0.125696	-0.607557			MD08G1045800	1	0	-0.194272	0.828407	0.178698
MD05G1067900	1	0	-0.167582	0.226019	-0.987273			MD02G1253700	1	0	0.566605	0.861292	0.277866
MD09G1069900	1	0	-0.826542	0.430694	-0.990382			MD14G1141200	1	0	0.258539	0.718663	-0.00571149
MD03G1060100	1	0	-1.3527	0.60553	0.441542			MD07G1138200	1	0	0.669813	0.656244	0.461233
MD07G1233300	1	0	-1.315	0.742811	-0.901299			MD07G1259100	1	0	-0.21778	0.98534	0.29646
MD11G1009500	1	0	0.0152816	-0.400838	-1.16298			MD11G1216600	1	0	-0.031228	0.859269	0.0742304
MD17G1087800	1	0	-1.25012	0.610263	-0.176212			MD13G1016800	1	0	0.917201	0.912587	0.805068
MD02G1270800	1	0	-1.2169	0.229449	-0.841586			MD05G1256800	1	0	0.570921	0.362913	0.21714
MD16G1255400	1	0	-1.06055	0.33235	0.058758			MD05G1250600	1	0	0.233325	0.47727	-0.309406
MD13G1154800	1	0	-0.540301	0.227766	-1.65241			MD05G1268400	1	0	0.0167953	0.849953	0.502137
MD17G1105900	1	0	-1.24027	0.586074	-0.215871			MD13G1253300	1	0	0.692908	0.236413	0.440555
MD01G1233900	1	0	-0.843664	0.149455	-0.729954			MD17G1219000	1	0	-0.217422	0.500783	0.167796
MD14G1008300	1	0	-1.6427	0.0136805	0.637357			MD05G1230600	1	0	0.612148	0.96328	0.39005
MD02G1249500	1	0	-1.3883	-0.185544	0.532162			MD05G1281200	1	0	0.335778	1.15863	0.61769
MD00G1070000	1	0	-0.0870648	-1.09782	-2.1417			MD05G1351300	1	0	0.126808	0.703961	0.0901058
MD04G1150300	1	0	-0.410333	0.496548	-0.125529			MD02G1218900	1	0	0.922496	0.721267	0.638719
MD15G1057000	1	0	-1.58021	0.201063	-0.547065			MD01G1042800	1	0	1.64859	0.618505	-0.701028
MD02G1065600	1	0	-1.45047	0.457233	-0.0819914			MD14G1074300	1	0	0.551189	0.756292	0.938881
MD06G1216700	1	0	-1.78135	-0.182408	0.10216			MD14G1203000	1	0	-0.293735	0.353627	0.187544
MD03G1190300	1	0	-1.55248	0.610596	-0.70832			MD09G1187900	1	0	0.479983	0.832883	-0.0371395
MD01G1106200	1	0	-0.829725	1.08242	-0.75607			MD16G1140100	1	0	0.698395	1.08849	0.559321
MD16G1082500	1	0	-1.34138	0.205055	0.463142			MD07G1242500	1	0	-0.0921484	0.818428	0.215363
MD01G1076000	1	0	-0.783328	0.247017	-0.588587			MD09G1173400	1	0	0.225717	0.359009	0.173025
MD17G1129800	1	0	-0.744751	-0.0473889	-0.231777			MD15G1263200	1	0	0.481133	0.793344	0.116187
MD17G1044000	1	0	-2.19676	-0.00576059	-0.406047			MD01G1109300	1	0	0.0278081	0.690675	0.5714
MD15G1286300	1	0	-0.70199	0.30862	-1.02895			MD07G1258400	1	0	0.501948	1.42414	0.601085
MD15G1288000	1	0	-1.7718	0.247869	-0.18996			MD02G1249400	1	0	0.666821	0.215846	0.270763
MD11G1196000	1	0	-1.34534	0.377052	-0.240689			MD16G1107800	1	0	-0.0827239	0.58315	0.0885696
MD01G1073200	1	0	-0.640559	0.524875	-0.635352			MD06G1200300	1	0	0.456867	0.645122	0.108437
MD10G1242600	1	0	-0.13378	-0.332394	-2.0984			MD02G1003300	1	0	-0.44591	1.35139	-0.507638
MD03G1092200	1	0	-0.350616	0.371659	-0.813761			MD04G1177500	1	0	-0.0590798	0.683385	-0.151957
MD17G1221800	1	0	-0.863643	0.249485	-1.30892			MD11G1173600	1	0	1.00508	0.662593	0.607662
MD02G1107100	1	0	-0.210533	-0.103003	-0.764364			MD00G1180100	1	0	0.2602	1.23718	0.0451482
MD03G1093800	1	0	-0.970623	0.641396	-1.22641			MD15G1356900	1	0	0.7842	0.558146	0.349407
MD08G1219800	1	0	-1.38404	0.338143	0.511392			MD17G1257100	1	0	0.317085	0.540637	0.108325
MD10G1319300	1	0	-0.928457	-0.0110647	-0.392439			MD02G1188600	1	0	0.0745693	0.364943	0.0081931
MD13G1155000	1	0	-0.444863	0.38065	-0.387513			MD14G1183700	1	0	-0.183474	0.492551	0.640913
MD15G1143600	1	0	-0.895053	-0.0399706	-0.64014			MD16G1117200	1	0	0.414545	0.563334	0.336971
MD15G1379100	1	0	-1.28532	-0.0725185	-0.417594			MD10G1098800	1	0	0.643615	1.27869	0.0522655
MD11G1298900	1	0	-0.87591	0.393507	-1.29045			MD15G1396500	1	0	0.745656	0.645111	1.04176
MD05G1242400	1	0	-0.955631	0.663107	-0.831266			MD05G1264400	1	0	-0.0182389	0.922683	0.487247
MD04G1040400	1	0	-0.832653	0.154989	-0.355666			MD12G1194600	1	0	0.0527146	0.690817	0.178843
MD05G1119000	1	0	-1.13922	0.314535	-0.708715			MD07G1019400	1	0	-0.707433	0.706332	-0.126878
MD02G1266500	1	0	-0.708799	0.720086	-0.461506			MD10G1123700	1	0	0.619988	0.572006	0.442356
MD01G1092800	1	0	-1.17263	0.327463	-0.859117			MD02G1026000	1	0	0.146555	0.380622	-0.0237555
MD17G1247400	1	0	-0.907671	0.218504	-0.518612			MD16G1151400	1	0	0.618312	0.757337	-0.0539988
MD00G1182200	1	0	-0.757168	0.529242	-0.729981			MD08G1031400	1	0	0.159106	0.987314	0.438853
MD07G1190000	1	0	-1.20951	0.469738	-0.347831			MD07G1159100	1	0	0.343546	0.773236	0.552436
MD09G1250300	1	0	-0.4627	0.140493	-0.574049			MD11G1244600	1	0	0.206926	0.608696	-0.0453922
MD15G1421400	1	0	-2.08849	0.113342	-0.391997			MD04G1019600	1	0	0.384088	0.354622	0.648848
MD01G1188800	1	0	-0.848629	1.0719	-0.623637			MD02G1147400	1	0	0.113372	0.638221	-0.230898
MD02G1166000	1	0	-1.47333	-0.460487	-0.315563			MD05G1219200	1	0	0.882237	0.825945	0.753947
MD01G1186200	1	0	-0.203863	0.091375	-0.590527			MD10G1133400	1	0	1.14095	0.063601	0.497512
MD14G1122100	1	0	-0.476741	0.628252	-0.2915			MD04G1174500	1	0	0.0839193	0.563936	-0.0704337
MD10G1234100	1	0	-0.967512	-0.0716631	-0.206241			MD07G1307400	1	0	-0.0104518	0.980954	-0.00913594
MD05G1304900	1	0	-0.839714	0.699581	-1.08431			MD04G1188800	1	0	0.281755	0.823663	0.276061
MD10G1121200	1	0	0.0575985	-1.72442	-1.95982			MD11G1078500	1	0	0.408588	0.826645	0.686251
MD16G1118100	1	0	-1.2964	0.207688	-0.382628			MD16G1044700	1	0	0.417417	0.51282	0.550935
MD17G1206600	1	0	-0.760262	0.445117	-0.767363			MD10G1124700	1	0	0.752671	0.88135	0.772845
MD09G1169300	1	0	-1.22907	0.557756	0.156986			MD02G1173000	1	0	1.05078	0.187247	0.24199
MD08G1127600	1	0	-0.782613	0.68055	-0.101556			MD02G1163700	1	0	0.940125	0.985898	0.21244
MD14G1159000	1	0	-0.951938	0.135828	-0.685382			MD13G1144300	1	0	0.443624	0.416413	0.401924
MD16G1128700	1	0	-0.783627	0.396881	-0.133897			MD06G1038900	1	0	0.229069	1.23187	0.48516
MD04G1104300	1	0	-1.56349	0.315096	-0.667752			MD09G1008300	1	0	0.248698	0.60698	0.31477
MD16G1073600	1	0	-0.360343	0.290602	-1.00581			MD13G1071500	1	0	0.81323	0.704466	1.38152
MD01G1210800	1	0	-0.770463	0.0804899	-1.06425			MD01G1233600	1	0	0.0467907	0.585008	-0.0484719
MD11G1215200	1	0	-1.52667	0.13106	-0.0614137			MD05G1263100	1	0	0.663247	0.264349	0.22219
MD14G1188500	1	0	-0.811179	0.0753693	-0.64108			MD04G1187700	1	0	0.707297	1.20506	0.17099
MD17G1077100	1	0	-0.300316	-0.347129	-1.9376			MD12G1176700	1	0	0.598151	0.708298	1.00036
MD08G1095500	1	0	-1.07438	0.462474	-0.845414			MD04G1172400	1	0	0.46249	0.89798	0.371977
MD12G1220900	1	0	-1.50893	0.331504	-0.0925326			MD01G1080800	1	0	0.169346	0.453397	0.216616
MD02G1128300	1	0	-1.29363	-0.0142656	-0.273664			MD07G1178300	1	0	0.441392	0.499149	0.185577
MD02G1180800	1	0	-1.63796	0.41464	-0.551864			MD00G1203600	1	0	0.487146	0.895401	0.749462
MD06G1235400	1	0	-0.749932	0.518908	-0.742587			MD17G1146100	1	0	1.16368	1.26032	-0.209156
MD12G1083400	1	0	-0.806618	0.206588	-0.218696			MD00G1172000	1	0	0.0179128	0.723193	0.515797
MD13G1048300	1	0	-0.695815	0.146323	-0.938258			MD09G1088500	1	0	-0.0976253	0.679696	0.0646432
MD10G1303000	1	0	-0.46569	0.0956464	-0.617766			MD11G1296100	1	0	0.0403589	0.771571	0.181686
MD02G1012400	1	0	-1.79039	0.447559	0.527945			MD14G1239400	1	0	-0.595591	1.60308	0.104632
MD03G1185900	1	0	-1.26243	0.0944865	-0.341968			MD04G1061400	1	0	0.0895485	0.589269	0.14688
MD00G1060400	1	0	-0.245348	0.595087	-0.629408			MD14G1113800	1	0	1.06376	0.947108	0.26201
MD12G1091000	1	0	-0.832824	-0.0575042	-1.34394			MD14G1049100	1	0	0.15318	0.566905	-0.204114
MD02G1314600	1	0	-1.5226	0.074388	-0.408364			MD00G1078100	1	0	0.385287	0.889801	0.539168
MD05G1117500	1	0	-1.3056	0.734987	-0.813458			MD10G1025000	1	0	0.482839	0.61624	0.209835
MD02G1247200	1	0	-1.03193	0.743099	-0.632242			MD05G1227200	1	0	0.222445	0.932846	0.429505
MD05G1349900	1	0	-0.490561	0.284011	-0.595303			MD13G1078600	1	0	0.293138	0.626668	0.0691508
MD15G1247400	1	0	-0.434905	-0.784712	-1.30811			MD17G1212000	1	0	0.536374	0.652846	0.170747
MD16G1148300	1	0	-0.58496	0.516924	-0.824031			MD02G1024300	1	0	-0.43943	0.779059	0.728653
MD14G1029600	1	0	-0.491753	0.815269	-0.518986			MD04G1163200	1	0	0.473803	0.43969	0.409897
MD05G1097600	1	0	-0.781198	0.158498	-0.979416			MD05G1301900	1	0	-0.15401	0.628764	0.0971914
MD02G1115100	1	0	-0.669466	0.43491	-0.367729			MD08G1015600	1	0	0.288162	0.561481	-0.159125
MD17G1061000	1	0	-0.673899	0.255692	-0.54984			MD05G1235900	1	0	0.145293	0.751169	0.119898
MD03G1103100	1	0	-1.39472	0.416985	-0.0303111			MD09G1161000	1	0	0.184551	0.947264	0.560812
MD02G1217100	1	0	-0.588668	-0.0379307	-0.470554			MD01G1101300	1	0	0.248161	0.615333	0.0625755
MD02G1169100	1	0	-0.908866	0.135039	-0.703274			MD13G1007800	1	0	0.554029	0.796869	0.595717
MD15G1231200	1	0	-1.56262	-0.605573	0.00326325			MD16G1133100	1	0	0.274429	1.19057	0.261107
MD03G1182200	1	0	-1.19992	-0.0616686	-0.202585			MD11G1281300	1	0	0.0429802	0.728515	0.184236
MD15G1059000	1	0	-1.71388	-0.0604948	-0.322735			MD09G1194700	1	0	-0.115173	0.998799	0.597626
MD01G1197600	1	0	-0.361634	-0.170984	-1.0047			MD08G1185000	1	0	0.69237	0.759674	0.921889
MD01G1155600	1	0	-0.841116	-0.0456737	-0.435208			MD02G1113200	1	0	0.133449	0.647083	-0.147078
MD04G1129500	1	0	-0.895689	0.326288	-1.35002			MD02G1112400	1	0	0.303123	0.704914	0.521976
MD02G1298200	1	0	-0.99117	0.483332	-0.579851			MD16G1017500	1	0	1.28473	0.861898	-0.0474363
MD01G1051300	1	0	-0.751179	0.373874	-0.538079			MD05G1034200	1	0	0.518572	1.3726	0.643579
MD16G1113000	1	0	-0.674764	0.58481	-0.479938			MD14G1075400	1	0	-0.557977	0.948522	0.421447
MD14G1053100	1	0	-1.08354	0.207642	-0.826262			MD07G1223100	1	0	0.969283	0.699985	0.744836
MD03G1268800	1	0	-0.35858	-0.110612	-0.681168			MD04G1067700	1	0	1.1679	1.14512	0.623567
MD06G1218300	1	0	-1.23293	0.124797	-0.164578			MD04G1197400	1	0	0.634258	0.675615	1.30443
MD11G1148500	1	0	-0.684882	0.529843	-0.299151			MD14G1157000	1	0	-0.200175	0.715883	0.363799
MD07G1270900	1	0	-0.797911	-0.4533	-0.246925			MD10G1184100	1	0	0.458368	0.412552	-0.132887
MD17G1279600	1	0	-1.1897	-0.428232	-0.154528			MD14G1092700	1	0	0.386237	0.896205	0.320314
MD15G1110400	1	0	-1.27997	0.0754206	0.340703			MD14G1135400	1	0	0.178847	0.725946	0.0277703
MD07G1086200	1	0	-1.19845	0.149057	-0.429833			MD12G1121200	1	0	0.00230218	0.748156	0.214592
MD03G1037400	1	0	-0.747841	0.366998	-0.551228			MD15G1178200	1	0	0.573893	0.113973	-0.0543961
MD05G1311400	1	0	-1.14667	-0.00666365	-0.254439			MD00G1203700	1	0	0.155442	0.696334	0.574781
MD13G1030600	1	0	-0.904513	-0.0354187	-0.395876			MD00G1165400	1	0	0.309416	0.668775	0.70727
MD17G1070400	1	0	-1.01861	0.258255	-0.26293			MD03G1291200	1	0	1.16384	-0.0723473	-0.175309
MD15G1083300	1	0	-1.0508	0.405735	-0.5521			MD01G1062500	1	0	0.145876	0.660503	1.27064
MD06G1178300	1	0	-1.24636	0.428322	-0.89622			MD10G1273200	1	0	0.129045	0.749655	0.160435
MD01G1079600	1	0	-1.17197	0.579307	-0.24121			MD03G1034800	1	0	0.254615	0.602052	1.29214
MD17G1082000	1	0	-1.45291	1.02537	-0.536372			MD06G1004000	1	0	0.0692228	0.913593	0.0674588
MD01G1235800	1	0	-0.724944	-0.388847	-1.21531			MD13G1036100	1	0	0.680373	0.318279	0.0543417
MD04G1208700	1	0	-0.23697	-1.42756	-2.35599			MD03G1240300	1	0	0.427869	0.034667	0.963824
MD13G1216300	1	0	-1.07311	0.0912805	-0.566756			MD06G1187400	1	0	0.6955	1.02593	0.296179
MD06G1088600	1	0	-0.620312	0.937013	-0.499805			MD14G1235500	1	0	-0.281289	0.337532	0.16719
MD12G1021000	1	0	-0.713102	0.974236	-0.0771289			MD02G1294400	1	0	-0.163548	0.751437	0.133332
MD17G1261500	1	0	0.212977	-0.096831	-1.02602			MD07G1103200	1	0	0.401685	0.753725	0.192867
MD02G1253700	1	0	-1.41131	-0.276668	0.483243			MD16G1071800	1	0	0.582803	1.27124	0.0302501
MD07G1041300	1	0	-0.694839	-0.213662	-0.385067			MD05G1323400	1	0	0.60512	0.438423	0.289853
MD15G1325000	1	0	-1.90234	0.0441815	0.0666344			MD16G1001100	1	0	0.767206	1.29605	0.692545
MD16G1213200	1	0	-0.361964	0.491684	-0.377938			MD07G1245600	1	0	0.338928	0.838993	0.490235
MD05G1256800	1	0	-1.25999	0.959588	-0.317109			MD15G1269400	1	0	-0.445295	0.408271	0.145881
MD08G1076500	1	0	-0.988582	-0.604685	-0.410326			MD14G1185500	1	0	0.191993	0.694688	0.381019
MD11G1284600	1	0	-1.85134	-0.0221577	-0.727766			MD10G1006900	1	0	0.429409	0.0937756	0.533897
MD03G1230900	1	0	-1.31289	0.0342958	-0.384122			MD06G1130900	1	0	-0.0718802	0.324318	0.102349
MD05G1268400	1	0	-1.19998	0.555706	-0.312621			MD17G1237900	1	0	0.485296	1.12738	0.452313
MD16G1203100	1	0	-0.461936	-0.0903253	-1.39337			MD15G1145900	1	0	0.334609	0.284537	0.0701952
MD08G1002300	1	0	-1.96838	0.0560814	-0.439099			MD03G1005600	1	0	1.047	0.450571	0.0136201
MD05G1247800	1	0	-1.40577	0.180115	-0.693243			MD11G1288500	1	0	0.0771353	1.14969	0.0428158
MD04G1035100	1	0	-1.7028	-0.936698	0.289748			MD16G1112000	1	0	-0.201627	0.328935	0.123931
MD06G1033900	1	0	-0.955117	0.389191	-0.822823			MD15G1081900	1	0	0.975927	1.22832	0.105363
MD06G1037400	1	0	-0.858961	0.452115	-0.48772			MD06G1047600	1	0	-0.0534171	0.638443	0.541442
MD07G1108800	1	0	-0.831232	0.346677	-0.630519			MD17G1128400	1	0	0.283034	0.94855	0.434882
MD01G1192100	1	0	-0.618652	-0.160029	-0.700523			MD02G1125300	1	0	0.863197	0.358953	1.79908
MD05G1211500	1	0	-0.73136	-0.252727	-0.442919			MD05G1256300	1	0	0.780566	1.26409	0.408375
MD16G1128800	1	0	-0.957006	0.209287	-0.176852			MD17G1002500	1	0	0.0256721	0.451517	0.283886
MD04G1166300	1	0	-1.49076	-0.24333	-0.0214628			MD17G1179500	1	0	0.353438	1.20674	0.627554
MD15G1285800	1	0	-1.02522	0.0577763	-0.660056			MD17G1052300	1	0	0.512221	0.445102	0.775721
MD13G1088200	1	0	-1.71246	0.00535616	-0.205847			MD08G1048800	1	0	0.623397	0.627117	1.15351
MD08G1037500	1	0	-0.391598	1.20325	-0.849839			MD16G1022600	1	0	-0.189958	0.361358	0.237665
MD02G1210200	1	0	-0.143859	0.0402699	-0.829151			MD09G1210000	1	0	0.124281	1.08172	0.197919
MD12G1072600	1	0	-1.70675	0.418553	-0.503521			MD02G1314200	1	0	0.517368	1.06158	0.521474
MD14G1229600	1	0	-1.07632	0.320688	-0.407729			MD16G1019800	1	0	0.165516	0.738811	0.322722
MD00G1052000	1	0	-1.28389	-0.166006	-0.2323			MD07G1277400	1	0	0.545019	0.179757	0.383517
MD11G1063500	1	0	-0.915073	0.224892	-0.884858			MD07G1242200	1	0	-0.134298	0.456501	0.170246
MD01G1188500	1	0	-0.170255	0.129953	-0.732446			MD00G1185600	1	0	0.693278	0.68767	0.555688
MD05G1087300	1	0	-1.45884	0.281047	-0.717136			MD00G1005600	1	0	1.13695	0.467763	0.462563
MD07G1252800	1	0	-0.738949	-0.0869952	-0.36427			MD01G1214100	1	0	0.510011	0.70927	0.475876
MD00G1022100	1	0	-0.578011	-0.0696733	-0.603144			MD01G1009700	1	0	-0.0585075	0.396871	0.196977
MD12G1016000	1	0	-1.18214	-0.447681	0.0244795			MD15G1420800	1	0	0.498915	1.2265	0.58856
MD08G1069700	1	0	-1.10725	-0.166008	-0.567993			MD13G1161500	1	0	-0.0852818	1.02419	0.675405
MD04G1247300	1	0	-0.742078	1.33579	-0.557285			MD07G1007400	1	0	0.582795	1.31825	0.0918515
MD16G1288300	1	0	-1.1407	0.0450115	-0.112688			MD07G1223400	1	0	0.431786	0.250328	0.136813
MD16G1119900	1	0	-0.369842	0.610311	-0.353251			MD06G1166000	1	0	0.444554	1.1569	0.640968
MD14G1185400	1	0	-0.954785	0.294603	-0.437168			MD06G1069500	1	0	0.289393	0.910585	0.466144
MD08G1242200	1	0	-1.22331	0.316001	-0.127448			MD07G1195500	1	0	0.479583	1.11865	0.179922
MD07G1204800	1	0	-0.35365	0.197144	-0.682772			MD05G1316300	1	0	0.653797	1.31133	0.674205
MD07G1229700	1	0	-0.77215	0.0695023	-0.467169			MD07G1200600	1	0	0.276633	0.467601	-0.32676
MD03G1294700	1	0	-1.22847	0.332578	-0.744866			MD13G1231000	1	0	0.655514	0.176394	-0.0262292
MD09G1104000	1	0	-0.713638	-0.517453	-0.591727			MD07G1174000	1	0	0.582237	0.343266	0.818395
MD12G1162400	1	0	-0.54289	0.37102	-0.265498			MD02G1085200	1	0	-0.083106	0.5234	-0.103042
MD08G1075000	1	0	-1.45088	0.33299	-0.767676			MD07G1295200	1	0	0.467714	0.518511	0.577401
MD12G1041700	1	0	-1.29702	0.380671	-0.338195			MD00G1005300	1	0	0.384569	1.50051	0.43942
MD04G1129600	1	0	-0.755342	0.455166	-0.516551			MD05G1019100	1	0	-0.245272	0.79915	0.0339644
MD02G1079400	1	0	-0.614519	0.147241	-0.823082			MD04G1196300	1	0	0.298316	0.966649	0.288694
MD02G1146200	1	0	-1.45792	0.0778013	0.19755			MD07G1254500	1	0	0.77122	0.193232	0.75544
MD13G1174300	1	0	-0.595723	1.14204	-0.584667			MD01G1124000	1	0	0.0683617	0.797166	0.336048
MD07G1176300	1	0	-0.979202	0.424966	-0.36626			MD05G1129900	1	0	0.219974	1.56041	0.190171
MD17G1241600	1	0	-0.992749	0.574882	-0.910075			MD08G1186800	1	0	0.606328	0.688719	0.287243
MD02G1045900	1	0	-1.67047	-0.552006	0.11415			MD12G1188100	1	0	0.712197	0.964375	0.165461
MD14G1028400	1	0	-0.866395	-0.189767	-0.442902			MD08G1232200	1	0	-1.12601	0.839166	0.454145
MD12G1208300	1	0	-1.35236	-0.248068	-0.156576			MD16G1109400	1	0	0.100971	0.968983	0.304247
MD10G1124300	1	0	-0.643341	0.109657	-0.503244			MD11G1246100	1	0	0.312304	0.989661	0.436899
MD07G1150800	1	0	-0.96393	0.0293995	-0.344782			MD09G1055000	1	0	-0.169796	1.12391	-0.0543364
MD16G1191500	1	0	-1.62495	-0.0373139	0.268446			MD10G1053000	1	0	0.217168	0.88103	0.123677
MD03G1054600	1	0	-1.02226	-0.456983	-0.135304			MD07G1182300	1	0	0.726303	0.705242	0.0425798
MD05G1363400	1	0	-0.743076	0.809701	-0.63777			MD15G1318400	1	0	0.675083	0.871499	0.746562
MD10G1327300	1	0	-0.672022	0.0381111	-0.877455			MD07G1082000	1	0	0.861583	0.391347	0.73241
MD08G1010800	1	0	-0.580504	-0.0913752	-0.365203			MD07G1164300	1	0	0.349054	0.481634	0.139518
MD00G1034600	1	0	-0.823012	0.0578818	-0.850441			MD03G1067800	1	0	0.181306	0.985697	0.485098
MD07G1257900	1	0	-0.54066	-0.0477789	-0.708911			MD03G1076700	1	0	0.773133	0.767612	0.349477
MD12G1165700	1	0	-1.40516	0.00330808	-0.146332			MD08G1103700	1	0	-0.311851	0.426157	0.239451
MD15G1368100	1	0	-1.18203	0.239792	-0.892557			MD10G1283600	1	0	-0.765547	0.521927	-0.207193
MD15G1404400	1	0	-0.56362	-0.0767312	-0.380326			MD06G1089200	1	0	-1.33311	0.941336	-0.3772
MD11G1174600	1	0	-0.886462	0.325632	-0.346037			MD03G1107000	1	0	-0.256753	0.461119	0.110862
MD07G1153000	1	0	-0.638694	-0.155388	-0.653619			MD02G1094800	1	0	0.428375	0.359348	0.48101
MD02G1107600	1	0	-1.04903	0.00508575	-0.455307			MD05G1190200	1	0	0.510945	0.535893	-0.0461824
MD02G1152800	1	0	-0.940452	0.123211	-0.554515			MD05G1337500	1	0	0.851119	1.04466	0.496176
MD16G1123000	1	0	-0.209188	0.0588582	-1.00196			MD16G1201100	1	0	0.596715	0.185519	0.476675
MD03G1215700	1	0	-1.22243	-0.0405814	-0.5786			MD10G1020100	1	0	-0.246463	0.606621	0.398398
MD08G1123900	1	0	-0.702936	0.00204545	-0.716679			MD06G1023200	1	0	-0.189618	0.352789	0.148891
MD00G1129800	1	0	-0.534912	0.0544938	-0.997266			MD15G1233500	1	0	0.102363	0.56241	0.104406
MD02G1173000	1	0	-1.44391	0.515798	0.0973219			MD15G1361400	1	0	0.680684	0.601533	0.195963
MD04G1226400	1	0	-1.01731	0.757404	-0.146659			MD10G1220200	1	0	0.290895	0.726975	0.195401
MD00G1125400	1	0	-0.793901	0.749486	-0.867831			MD15G1298200	1	0	0.376658	0.504367	0.403721
MD04G1199900	1	0	-0.705347	0.289493	-0.798073			MD11G1203300	1	0	0.731511	0.959138	0.843929
MD11G1195800	1	0	-1.06078	0.882414	-0.962347			MD15G1379500	1	0	0.00156325	0.673594	0.306089
MD04G1092800	1	0	-0.432817	0.222267	-1.08591			MD09G1111700	1	0	-0.0785647	0.731274	0.309361
MD02G1155100	1	0	-1.31314	0.163078	-0.663263			MD02G1184400	1	0	0.236758	0.559747	0.482336
MD04G1187700	1	0	-0.692107	1.02943	-0.528392			MD17G1138100	1	0	-0.46212	1.26544	0.125728
MD13G1168000	1	0	-0.725205	0.463976	-0.316494			MD15G1170700	1	0	-0.134818	0.425717	0.157358
MD00G1037100	1	0	-0.688044	0.97729	-1.07014			MD00G1006100	1	0	1.11137	0.00994327	1.46942
MD07G1233900	1	0	-1.67509	0.3468	0.219844			MD03G1250600	1	0	0.337005	1.03146	0.410228
MD10G1197600	1	0	-0.690058	0.352328	-1.01673			MD14G1075200	1	0	-0.385354	1.11266	0.653252
MD04G1011400	1	0	-0.792152	-0.242197	-0.0473464			MD10G1109800	1	0	-0.125498	0.556491	0.244036
MD13G1017200	1	0	-0.742353	0.00983862	-0.296516			MD08G1242800	1	0	-0.0472957	1.56613	0.841412
MD02G1246600	1	0	-1.03515	0.578027	-0.107884			MD06G1142900	1	0	0.525378	0.870401	0.410711
MD05G1132600	1	0	-1.27293	0.313128	-0.858277			MD13G1183000	1	0	0.314998	0.803265	0.361655
MD02G1252000	1	0	-0.628408	0.257079	-0.583293			MD06G1060200	1	0	-0.054162	0.527179	0.557867
MD15G1403000	1	0	-0.978993	0.225536	-0.189259			MD03G1243600	1	0	0.801206	1.36624	0.56214
MD00G1007200	1	0	-1.54245	0.131322	0.184634			MD03G1197600	1	0	-1.06296	0.691173	-0.503685
MD00G1058000	1	0	-0.509793	0.0684211	-0.458671			MD03G1124300	1	0	0.345749	0.83915	0.490984
MD02G1313400	1	0	-0.400044	0.323621	-0.813482			MD13G1037900	1	0	0.980197	0.78226	0.716608
MD10G1283900	1	0	-0.807318	0.840813	-0.667561			MD06G1204100	1	0	0.489894	0.053256	0.876902
MD08G1039300	1	0	-1.17011	0.311514	-1.20412			MD04G1093300	1	0	-0.227307	1.32769	0.399815
MD11G1271200	1	0	-0.920504	0.413611	-0.718342			MD16G1002700	1	0	0.202248	1.16001	0.304034
MD04G1165800	1	0	-1.84775	-0.439631	-0.194889			MD09G1247700	1	0	0.270533	0.928807	0.265137
MD02G1251000	1	0	-0.821781	0.136091	-0.649468			MD03G1189600	1	0	-0.12498	0.625295	0.119562
MD10G1076100	1	0	-1.09947	-0.125361	-0.54785			MD09G1033000	1	0	0.311079	0.790165	0.65392
MD15G1184000	1	0	-1.5408	0.371113	-0.60664			MD16G1188700	1	0	0.503835	0.389081	0.651781
MD02G1035000	1	0	-1.34446	0.633456	-0.15584			MD17G1207500	1	0	-0.741389	1.63177	-0.38526
MD09G1085300	1	0	-1.02433	0.315689	-1.00205			MD07G1234600	1	0	0.682703	1.30676	0.732007
MD04G1174900	1	0	-0.945943	0.524177	-0.574057			MD10G1128600	1	0	0.011046	0.734704	0.0194362
MD05G1312300	1	0	-1.24314	-0.0309963	-0.634605			MD01G1108100	1	0	0.0442018	0.463033	0.317685
MD04G1187300	1	0	-0.658354	-0.0992328	-0.319279			MD12G1016200	1	0	0.372934	0.781381	0.424877
MD02G1011900	1	0	-1.08845	0.654269	-1.08626			MD03G1266200	1	0	0.259527	0.546914	-0.0613764
MD09G1242900	1	0	-0.84528	0.00989234	-0.557644			MD05G1171900	1	0	0.205888	0.972869	0.822303
MD08G1246200	1	0	-1.04559	-0.274883	-0.302833			MD13G1051100	1	0	0.404161	0.786615	-0.118489
MD12G1262800	1	0	-0.965756	0.576673	-0.659002			MD11G1047400	1	0	-0.148107	0.638663	0.586763
MD16G1092600	1	0	-0.745115	0.186336	-0.912922			MD16G1140800	1	0	-0.0532269	1.16336	0.368366
MD09G1005600	1	0	-1.4743	0.25248	-0.687002			MD10G1157900	1	0	0.878008	1.42505	0.178248
MD06G1241000	1	0	-0.96668	0.592555	-0.875752			MD13G1174100	1	0	-0.00818698	0.734465	0.282885
MD06G1015900	1	0	-1.06996	-0.344599	-0.341353			MD08G1126500	1	0	0.212004	0.62556	-0.277075
MD15G1385300	1	0	-0.973242	-0.125604	-0.382158			MD14G1208900	1	0	0.125766	0.620795	0.148141
MD08G1188100	1	0	-1.46649	0.577994	-0.907874			MD02G1162900	1	0	-0.427781	0.683494	0.460024
MD07G1200700	1	0	-1.27422	-0.316022	-0.270543			MD07G1046200	1	0	-0.0351182	0.518181	-0.00853932
MD03G1077800	1	0	-0.856096	-0.0277246	-0.466434			MD07G1203300	1	0	-0.415242	0.722866	0.138475
MD06G1078600	1	0	-0.120341	0.528841	-0.868114			MD15G1031100	1	0	0.226435	0.686732	0.264195
MD05G1300100	1	0	-0.756784	0.54712	-1.13954			MD14G1062500	1	0	0.0438162	0.947422	0.511632
MD10G1228000	1	0	-1.48075	0.00481072	0.285304			MD10G1259600	1	0	0.0964237	0.609961	0.282852
MD11G1012800	1	0	-1.28562	0.458878	-0.808362			MD03G1067700	1	0	0.197327	1.01421	0.385679
MD17G1057000	1	0	-1.04422	0.159796	-0.597792			MD07G1242600	1	0	0.31406	0.935076	0.881229
MD10G1258400	1	0	-0.822148	-0.242279	-1.40955			MD07G1146100	1	0	0.805968	0.619786	0.467541
MD02G1110700	1	0	-1.15221	0.452149	-1.17478			MD05G1121300	1	0	0.270718	1.1211	0.440035
MD04G1031000	1	0	-1.11984	0.337134	-0.452529			MD16G1211300	1	0	-0.441144	1.02365	0.544402
MD02G1062500	1	0	-0.806998	-0.348719	-0.458945			MD07G1227100	1	0	-0.0992876	1.37592	0.329378
MD10G1244400	1	0	-1.73949	0.0765099	-0.289828			MD17G1087300	1	0	-0.129444	0.373903	0.247502
MD14G1187100	1	0	-0.698022	0.00721318	-0.702711			MD06G1199700	1	0	0.673922	0.0876873	0.52188
MD08G1046500	1	0	-0.943755	0.188893	-0.897002			MD13G1092800	1	0	0.167006	0.606826	0.0279744
MD11G1261100	1	0	-0.687721	0.127788	-0.367231			MD11G1082600	1	0	1.23487	0.842744	-0.523878
MD16G1120900	1	0	-0.470762	0.243387	-1.40067			MD12G1155300	1	0	0.272629	0.230136	0.916341
MD15G1105900	1	0	-0.729252	0.161316	-1.18335			MD00G1142500	1	0	0.562306	0.278901	0.141207
MD17G1214300	1	0	-1.0896	0.228635	-0.565227			MD08G1152900	1	0	-0.203517	0.472728	0.217125
MD15G1178200	1	0	-1.4446	0.11932	0.164439			MD01G1210600	1	0	0.426244	0.99555	0.209875
MD13G1186100	1	0	-0.90324	0.233247	-0.76417			MD01G1202600	1	0	0.48599	1.40101	0.621929
MD03G1291200	1	0	-1.24545	1.21782	-0.648119			MD15G1085800	1	0	0.575557	0.350862	0.558651
MD15G1081300	1	0	-0.322854	-1.76901	-1.38305			MD15G1233200	1	0	0.721841	1.15146	0.465579
MD04G1166000	1	0	-1.49994	-0.409108	-0.432746			MD09G1118000	1	0	0.898145	0.899757	-0.0960785
MD13G1185600	1	0	-0.30153	0.284955	-0.692893			MD12G1030200	1	0	1.21491	0.952657	0.604624
MD03G1062600	1	0	-1.46152	0.580143	-0.211197			MD14G1172900	1	0	0.630573	0.658376	0.21698
MD07G1222400	1	0	-0.246125	-0.617749	-1.35247			MD06G1226600	1	0	0.473006	0.774334	0.474808
MD13G1036100	1	0	-0.697604	0.843547	-0.53596			MD12G1174600	1	0	0.64309	0.862786	0.436021
MD03G1240300	1	0	-0.621831	0.885552	-0.252084			MD15G1377600	1	0	0.718229	1.02211	0.321999
MD10G1153100	1	0	-0.534638	-0.192438	-1.14619			MD01G1112500	1	0	0.254856	0.411548	-0.0100536
MD12G1246800	1	0	-0.812263	-0.223237	-2.16442			MD16G1091900	1	0	0.0693065	0.772722	0.213274
MD11G1298800	1	0	-1.19943	-0.10593	-0.150747			MD14G1017200	1	0	0.60189	0.802115	0.900098
MD01G1024100	1	0	-1.01624	0.421853	-0.760495			MD11G1158300	1	0	0.437869	0.739971	-0.0985121
MD05G1124400	1	0	-1.08835	0.214469	-1.04082			MD07G1061500	1	0	0.226718	0.750234	0.202154
MD11G1126100	1	0	-0.732879	0.470681	-0.898364			MD09G1076600	1	0	0.305567	0.719692	0.322715
MD00G1022200	1	0	-1.22688	0.279143	-1.35638			MD16G1145200	1	0	0.845046	0.964263	0.763573
MD17G1072100	1	0	-0.666718	0.0781014	-0.456279			MD13G1194400	1	0	-0.201754	0.491857	0.189841
MD08G1066400	1	0	-0.950795	-0.190242	-0.589848			MD15G1381700	1	0	0.345974	1.35289	0.63656
MD14G1185500	1	0	-1.02351	0.216559	-0.0498553			MD06G1105900	1	0	0.347001	0.326412	0.191042
MD10G1006900	1	0	-1.13924	0.67877	-0.380012			MD03G1003400	1	0	0.2363	0.733009	0.337561
MD17G1239900	1	0	-0.884874	0.0340907	-0.686931			MD03G1262100	1	0	-0.287658	0.394856	0.168147
MD15G1145900	1	0	-1.2241	0.205725	-0.277848			MD07G1295900	1	0	0.262771	0.6745	-0.155075
MD04G1085600	1	0	-1.70991	-0.212626	0.234244			MD05G1299300	1	0	0.0644125	0.996984	0.889647
MD12G1225300	1	0	-0.922644	0.227053	-0.255336			MD08G1188600	1	0	0.307883	0.608661	0.24316
MD03G1072800	1	0	-1.78296	0.115247	-0.590059			MD07G1004800	1	0	0.625016	0.490321	0.120152
MD15G1381900	1	0	-0.966651	-0.0826605	-0.916046			MD02G1030300	1	0	-0.495496	0.921637	0.0335759
MD07G1154700	1	0	-0.984245	0.331585	-0.624153			MD02G1288600	1	0	0.464828	0.80404	1.13555
MD04G1233100	1	0	-1.90638	-0.0710639	-0.278298			MD16G1165000	1	0	0.0315439	0.411245	0.745724
MD05G1254700	1	0	-1.2226	0.11165	-0.52916			MD07G1018000	1	0	0.595342	0.175579	0.538423
MD15G1247000	1	0	-1.53407	0.2233	0.182485			MD00G1026700	1	0	0.232988	0.523906	-0.0315763
MD14G1132200	1	0	-1.42653	0.581279	-0.640138			MD08G1191400	1	0	0.126968	0.601073	0.111386
MD17G1286800	1	0	-0.560857	0.915537	-1.1407			MD12G1222100	1	0	-1.06024	1.68972	-0.538172
MD09G1263700	1	0	-0.690076	-0.320571	-0.465254			MD02G1291300	1	0	-0.0837589	0.577993	0.746647
MD11G1079800	1	0	-0.863488	0.271665	-1.27562			MD16G1245600	1	0	0.149327	0.74463	0.138522
MD15G1199400	1	0	-0.955882	0.029549	-0.788223			MD10G1175300	1	0	0.741919	1.30454	0.542331
MD04G1018500	1	0	-1.29007	-0.108198	-0.360121			MD12G1194400	1	0	-0.0671888	0.822577	0.895172
MD06G1120900	1	0	-0.303183	0.322217	-0.627378			MD17G1039800	1	0	0.192897	0.248729	0.941148
MD13G1236900	1	0	-0.470037	0.253137	-0.61468			MD05G1298400	1	0	0.314563	0.920451	0.0440363
MD14G1165900	1	0	-0.712206	0.260355	-0.803194			MD09G1152600	1	0	0.519845	-0.02659	0.574842
MD12G1020600	1	0	-1.33392	0.0798203	-0.230884			MD15G1331900	1	0	-0.439009	0.473633	-0.00929752
MD09G1279300	1	0	-0.850622	0.681599	-0.724625			MD15G1364800	1	0	0.582496	1.25667	0.487818
MD04G1083900	1	0	-1.12781	-0.215454	-0.0992472			MD11G1278500	1	0	0.32163	0.883573	0.533759
MD16G1236000	1	0	-0.646234	0.313506	-1.05943			MD09G1032700	1	0	0.503654	0.717562	0.774807
MD17G1180300	1	0	-1.53992	0.0969388	-0.364558			MD03G1224800	1	0	-0.310027	0.774059	0.488808
MD12G1245000	1	0	-0.978682	0.298618	-0.705906			MD15G1161300	1	0	-0.632388	1.46144	-1.18691
MD12G1046200	1	0	-0.783624	-0.113513	-0.672809			MD15G1048900	1	0	0.578525	1.4111	0.643266
MD17G1110100	1	0	-0.742913	-0.343509	-0.0556502			MD02G1169600	1	0	0.0122394	0.721206	0.416381
MD07G1277400	1	0	-1.40262	0.13021	0.460596			MD02G1113000	1	0	0.244362	0.806335	0.258871
MD16G1254200	1	0	-0.798508	0.891056	-0.478523			MD15G1057200	1	0	0.305813	0.443729	0.719495
MD12G1217400	1	0	-0.950255	0.400045	-0.624189			MD03G1067500	1	0	-0.0516122	0.878836	0.421774
MD16G1144700	1	0	-0.747711	0.805019	-0.827332			MD12G1022700	1	0	1.32724	0.927895	0.618282
MD11G1273700	1	0	-1.5804	-0.576588	-0.445219			MD01G1035100	1	0	0.66669	0.730878	0.649918
MD10G1176300	1	0	-0.401903	-0.247465	-0.386371			MD16G1091200	1	0	0.537543	0.330501	-0.122293
MD15G1184500	1	0	-1.36535	-0.418749	-0.382152			MD06G1224000	1	0	0.205766	0.794231	0.193856
MD07G1306200	1	0	-0.919639	-0.19459	-0.56336			MD11G1280200	1	0	0.113591	0.900912	0.517111
MD12G1156700	1	0	-0.696938	-0.406585	-1.33938			MD15G1344600	1	0	-0.336619	1.649	0.725064
MD03G1016400	1	0	-0.362714	-0.0994322	-0.970167			MD07G1193600	1	0	-0.220835	0.589501	0.235647
MD12G1223900	1	0	-0.980168	0.53015	-0.411723			MD07G1163800	1	0	0.73243	0.901732	0.303721
MD07G1309500	1	0	-0.921734	0.175861	-0.0704124			MD02G1228800	1	0	-0.239569	1.32933	0.525578
MD03G1031200	1	0	-1.53972	-0.00265948	0.0384			MD03G1299000	1	0	0.242392	0.815695	0.44689
MD05G1011000	1	0	-1.41691	0.58733	-0.220419			MD03G1217300	1	0	0.640292	0.479187	0.595302
MD15G1412500	1	0	-1.05996	0.14204	-0.322901			MD07G1063400	1	0	0.415211	0.758811	0.407821
MD01G1061600	1	0	-1.25759	-0.198357	-0.42206			MD00G1081300	1	0	0.503071	0.437621	0.595951
MD15G1115900	1	0	-1.4144	-0.219277	-0.534232			MD00G1158600	1	0	-0.0146871	0.616035	0.506577
MD15G1243100	1	0	-1.11237	-0.140172	-0.507641			MD10G1062500	1	0	0.610323	0.0827833	0.527482
MD07G1223400	1	0	-0.410553	0.48388	-0.203096			MD00G1023600	1	0	0.0531792	0.526651	-0.244517
MD17G1184100	1	0	-1.47556	0.163541	-0.0420141			MD05G1140300	1	0	0.670395	0.686297	0.65607
MD06G1206400	1	0	-0.952113	-0.157215	-0.283795			MD17G1179700	1	0	0.225251	1.0372	0.524272
MD06G1069500	1	0	-1.47708	0.430434	0.153726			MD08G1045900	1	0	-0.128151	0.928086	0.29039
MD06G1057700	1	0	-0.404659	0.324299	-0.678046			MD09G1127900	1	0	0.0306857	0.728961	0.830539
MD13G1118700	1	0	-0.826407	-0.493843	-0.345029			MD15G1336300	1	0	-0.0238282	0.5912	-0.0246865
MD06G1182800	1	0	-0.335247	0.176281	-0.789236			MD08G1046300	1	0	0.156469	0.517156	0.248265
MD13G1197900	1	0	-1.02294	0.103694	-1.53898			MD14G1030100	1	0	-0.19795	0.57478	0.0582472
MD02G1150700	1	0	-0.954244	-0.241905	-0.216942			MD12G1078600	1	0	0.172861	0.619251	0.323755
MD11G1046800	1	0	-1.39653	-0.686197	-0.349695			MD02G1087700	1	0	0.385295	1.26306	0.218191
MD13G1038300	1	0	-0.801286	0.0056004	-0.999905			MD15G1036900	1	0	0.0749375	0.525508	-0.25406
MD15G1106600	1	0	-1.22081	0.154264	-0.376958			MD05G1190000	1	0	0.300489	0.720153	0.390076
MD13G1231000	1	0	-0.578068	0.758401	-0.322104			MD01G1214300	1	0	0.535066	0.831751	0.126654
MD07G1174000	1	0	-1.51654	0.529598	0.204982			MD05G1264300	1	0	0.453101	0.98204	0.616604
MD05G1243000	1	0	-1.00578	0.0259536	-1.4475			MD15G1419400	1	0	0.287679	0.607613	0.28347
MD15G1066100	1	0	0.431102	-0.238292	-1.09373			MD11G1042600	1	0	0.146902	0.767013	0.0109865
MD03G1116100	1	0	-1.09243	-0.0710307	-0.370092			MD08G1085200	1	0	0.518616	0.458663	0.42747
MD15G1064500	1	0	-1.35094	0.267464	-0.50826			MD06G1108600	1	0	0.0110324	0.656172	0.592836
MD02G1201700	1	0	-0.91726	0.314902	-0.601135			MD05G1207000	1	0	0.96356	1.04429	1.06476
MD13G1105100	1	0	-0.666807	-0.158831	-0.903378			MD02G1041700	1	0	0.12376	0.931942	0.43758
MD17G1106100	1	0	-0.190625	0.203186	-0.705709			MD12G1246100	1	0	0.299482	0.440606	-0.0555573
MD15G1251100	1	0	-0.679338	0.38667	-0.934871			MD16G1074800	1	0	-0.334665	1.0851	0.824132
MD06G1225500	1	0	-1.26913	0.270701	-0.87476			MD04G1017700	1	0	0.746769	0.458909	0.997804
MD03G1134700	1	0	-0.899329	0.324004	-1.12122			MD07G1120700	1	0	0.326377	0.723685	-0.246532
MD13G1034100	1	0	-0.461027	-0.23697	-0.471328			MD05G1274700	1	0	-0.376071	1.11239	0.155804
MD11G1214000	1	0	-1.1229	-0.0868488	-0.374946			MD15G1143100	1	0	0.60772	0.388128	0.329234
MD09G1240300	1	0	-0.701299	0.00835253	-0.794545			MD17G1087000	1	0	-0.228075	0.316668	0.487223
MD02G1264900	1	0	-1.60056	0.26661	0.223951			MD08G1083200	1	0	-0.150666	0.400917	0.0511821
MD17G1084900	1	0	0.633881	-2.01219	-2.15211			MD16G1161400	1	0	-0.128113	0.927486	0.402366
MD04G1207200	1	0	-1.04267	0.503156	-0.269051			MD09G1280400	1	0	0.284156	0.298031	0.032704
MD11G1130000	1	0	-1.46883	-0.393805	-0.368425			MD08G1016600	1	0	-1.642	0.846391	0.000215865
MD11G1251800	1	0	-1.03694	-0.0577663	-0.580453			MD02G1264800	1	0	0.416176	0.49377	0.601226
MD06G1183200	1	0	-0.804052	0.0269735	-0.632566			MD17G1263100	1	0	-0.194267	0.47157	0.133561
MD16G1275100	1	0	-1.18147	0.29181	-0.199756			MD14G1064600	1	0	0.499509	1.16324	0.253818
MD10G1227800	1	0	-0.739542	0.115155	-0.583504			MD10G1175500	1	0	0.768844	0.324619	0.358519
MD02G1027300	1	0	-0.962725	-0.0274933	-0.286063			MD04G1161400	1	0	-0.65589	0.317069	0.602106
MD05G1325400	1	0	-1.29135	0.178492	-0.130256			MD05G1163300	1	0	0.413048	1.38488	0.733837
MD06G1089200	1	0	-0.663715	-0.186856	-0.732514			MD11G1277100	1	0	0.44889	0.88082	0.389896
MD04G1034900	1	0	-1.77557	-0.217572	0.0898989			MD11G1311300	1	0	0.424647	0.558931	0.0456477
MD13G1038000	1	0	-1.53154	0.664637	-0.0442893			MD16G1010900	1	0	0.200595	1.2731	-0.185463
MD00G1003600	1	0	-0.755227	0.0597883	-0.704774			MD10G1176600	1	0	0.174276	0.997921	0.257866
MD01G1161000	1	0	-0.990332	0.432534	0.0453084			MD11G1230900	1	0	0.24502	0.967781	0.544851
MD04G1244100	1	0	-1.11002	-0.0184898	-0.35056			MD15G1365300	1	0	-0.128711	0.568033	0.142415
MD01G1182300	1	0	-0.701926	0.00217767	-0.350237			MD05G1128800	1	0	0.962532	0.618855	0.584864
MD14G1008100	1	0	-1.12755	-0.251261	-0.509057			MD08G1043700	1	0	0.167655	0.677491	0.405532
MD15G1066700	1	0	-0.688555	0.376587	-1.3662			MD16G1201800	1	0	0.818879	0.33754	0.564483
MD17G1017100	1	0	-1.04436	0.44959	-0.951167			MD13G1222600	1	0	0.632732	1.16053	0.348993
MD12G1083000	1	0	-0.790823	-0.211371	-0.613258			MD11G1156200	1	0	0.687321	0.854626	0.243272
MD08G1169500	1	0	-0.0787227	-0.061828	-0.67366			MD09G1146100	1	0	0.112459	0.768373	0.721807
MD02G1036800	1	0	-1.8853	-0.113783	0.408033			MD12G1256800	1	0	0.40516	0.873332	0.249633
MD16G1201100	1	0	-0.569721	0.428581	-0.184094			MD15G1049100	1	0	0.255949	0.459399	0.160582
MD09G1224300	1	0	-0.734608	0.24011	-0.490736			MD16G1157400	1	0	0.334748	0.494925	0.523355
MD15G1029200	1	0	-1.09633	0.125755	-0.649897			MD12G1226100	1	0	0.350931	0.546339	-0.245467
MD08G1010300	1	0	-1.87061	0.0235741	0.00579175			MD12G1190700	1	0	0.459511	-0.000431308	0.694045
MD07G1024500	1	0	-0.940705	0.353577	-0.659506			MD02G1233100	1	0	0.559731	0.885043	0.424168
MD06G1207500	1	0	-1.01363	0.0997647	-0.622599			MD02G1063800	1	0	-0.403133	0.50658	-0.05886
MD12G1099800	1	0	-1.55231	0.291809	-0.679342			MD14G1114700	1	0	0.482702	0.994432	0.0535027
MD06G1096200	1	0	-0.924692	-0.0418849	-0.550394			MD11G1244500	1	0	0.519093	0.984004	0.371831
MD15G1344500	1	0	-0.814378	0.426648	-0.670017			MD06G1020600	1	0	0.281948	0.902184	0.399719
MD10G1000300	1	0	-0.156858	0.086548	-0.541347			MD02G1174500	1	0	0.432097	0.356703	0.0757229
MD12G1037000	1	0	-1.46272	-0.50907	-0.218837			MD17G1269000	1	0	0.470572	1.15868	-0.0536648
MD15G1368000	1	0	-1.0569	-0.0349395	-0.134911			MD13G1096800	1	0	0.415652	0.424478	0.532035
MD01G1057600	1	0	-1.06279	0.0838887	-1.33441			MD11G1049600	1	0	1.29367	1.5071	-0.121358
MD06G1054800	1	0	-0.960463	-0.148029	-1.9134			MD16G1050100	1	0	0.126057	1.53172	0.153928
MD05G1310400	1	0	-1.07425	0.139687	-0.0217986			MD05G1280900	1	0	0.297896	0.581643	-0.146504
MD02G1172900	1	0	-0.996601	-0.305191	-0.0872653			MD06G1028600	1	0	1.09976	1.0704	0.179153
MD14G1076000	1	0	-0.719188	-0.355733	-0.507803			MD06G1125900	1	0	0.48272	0.533778	0.560415
MD15G1260900	1	0	-0.671465	-0.121257	-0.784459			MD10G1043300	1	0	0.726995	0.484163	0.418705
MD16G1227100	1	0	-0.701767	-0.0803088	-0.616714			MD16G1130800	1	0	0.372613	1.41193	0.578914
MD15G1347600	1	0	-0.886852	0.587621	-1.42771			MD13G1106200	1	0	0.314922	0.796645	-0.121887
MD07G1305800	1	0	-0.665919	-0.201501	-0.515497			MD10G1296800	1	0	0.494408	1.20735	0.462138
MD05G1075300	1	0	-0.993934	0.324797	-0.84786			MD03G1217700	1	0	0.434948	0.33073	1.40914
MD01G1185800	1	0	-0.537365	-0.0399014	-0.204724			MD03G1046700	1	0	-0.525651	0.617751	0.21546
MD06G1162400	1	0	-1.11839	-0.210949	-0.45914			MD11G1061600	1	0	0.181697	0.7276	0.153144
MD15G1233100	1	0	-0.844128	-0.340782	-0.546862			MD13G1090000	1	0	0.782377	0.537892	-0.0306998
MD02G1132500	1	0	-1.27042	0.274563	-0.724038			MD05G1247600	1	0	0.662855	0.527634	1.22924
MD15G1298900	1	0	-0.603347	0.177555	-1.43279			MD09G1026100	1	0	0.663506	0.789939	0.169469
MD15G1379500	1	0	-0.939195	0.404899	-0.205926			MD14G1146900	1	0	0.519184	-0.110704	0.677897
MD08G1217500	1	0	-0.929853	0.569974	-0.584701			MD10G1085500	1	0	-0.741655	0.341195	-0.0251207
MD14G1138500	1	0	-0.494824	-0.251516	-0.360546			MD09G1045100	1	0	0.472436	0.721625	0.555937
MD14G1001600	1	0	-0.936789	-0.077681	-0.716697			MD11G1307500	1	0	0.622139	0.161002	0.971481
MD15G1226700	1	0	-0.912998	0.101115	-0.791019			MD06G1210500	1	0	-0.245641	1.12893	-0.229828
MD11G1027600	1	0	-0.960606	-0.0828063	-0.940577			MD00G1026200	1	0	0.0109348	0.521428	0.0383679
MD04G1131200	1	0	-0.892141	-0.166494	-0.617652			MD13G1050400	1	0	0.835729	-0.140629	0.393728
MD16G1106400	1	0	-0.0448227	-0.38031	-2.12925			MD17G1194800	1	0	0.663295	1.33582	0.529202
MD13G1174600	1	0	-0.583349	0.0844975	-0.442445			MD04G1180100	1	0	0.615338	0.571384	-0.0162172
MD04G1009500	1	0	-0.565452	0.239737	-0.384565			MD05G1332300	1	0	0.0834283	0.940374	0.424172
MD15G1052300	1	0	-0.699811	0.00482966	-0.543463			MD16G1247600	1	0	0.486514	0.750948	0.95876
MD12G1003600	1	0	-0.997677	0.652535	-0.460932			MD11G1067400	1	0	0.458361	0.317049	1.15156
MD14G1236900	1	0	-1.59845	0.319002	-0.243963			MD08G1019100	1	0	-0.0149704	0.715986	0.0759576
MD01G1074700	1	0	-1.97278	-0.303825	0.0250096			MD13G1173500	1	0	-0.871518	0.848666	0.997702
MD09G1121200	1	0	-0.671455	-0.0988187	-0.655529			MD10G1119200	1	0	0.11743	0.383424	0.112592
MD04G1116200	1	0	-0.647916	0.179056	-0.583653			MD16G1056600	1	0	0.095909	0.635957	0
MD09G1253400	1	0	-0.375382	-0.141358	-1.13843			MD09G1218700	1	0	-0.0878463	0.337473	0.0675217
MD09G1207800	1	0	-0.783301	0.0205223	-0.657685			MD03G1206700	1	0	0.263369	0.690487	0.0996534
MD17G1034400	1	0	-0.641399	-0.0271084	-0.56982			MD17G1119100	1	0	-0.385132	0.445467	0.207036
MD03G1003700	1	0	-1.13431	-0.0545761	-0.546475			MD10G1165300	1	0	0.095253	0.575288	-0.0387719
MD03G1074000	1	0	-1.37795	0.639937	-0.432251			MD15G1430600	1	0	0.450076	1.39246	0.164646
MD04G1096200	1	0	-0.860299	1.03745	-1.40549			MD15G1212100	1	0	0.488798	0.858299	0.187848
MD14G1189100	1	0	-0.849385	0.114405	-0.496515			MD10G1274100	1	0	-0.252138	0.44999	0.110618
MD17G1133400	1	0	-0.894231	0.423838	-1.51856			MD03G1001700	1	0	0.736937	0.776071	0.134899
MD00G1092500	1	0	-0.481094	1.18873	-0.863669			MD00G1034500	1	0	0.67999	0.541097	0.669435
MD05G1345300	1	0	-0.848768	0.18826	-0.793835			MD07G1289400	1	0	0.078708	0.798198	0.430592
MD17G1044600	1	0	-1.3145	-0.175867	-0.424127			MD15G1343400	1	0	0.783037	0.580758	1.21395
MD11G1209500	1	0	-0.972493	0.358739	-0.632964			MD11G1034400	1	0	0.0932013	0.70539	0.0961978
MD09G1042200	1	0	-0.98608	0.480555	-0.918272			MD14G1127700	1	0	0.135306	0.528263	0.730709
MD02G1246100	1	0	-1.58864	0.690629	-0.388048			MD01G1083500	1	0	0.108878	1.46583	0.420132
MD08G1234400	1	0	0.0137134	-0.40595	-1.45942			MD01G1123300	1	0	-0.707136	0.913643	0.416872
MD10G1118600	1	0	-1.25272	0.101308	-0.410461			MD08G1144800	1	0	-0.145608	0.620324	0.227414
MD02G1258600	1	0	-0.749672	0.506063	-0.744289			MD02G1194900	1	0	0.590737	0.879684	0.737443
MD15G1105700	1	0	-0.644268	0.336869	-0.652871			MD08G1166700	1	0	0.482266	1.04619	0.580906
MD10G1340700	1	0	-1.58103	-0.373796	-0.286247			MD10G1234000	1	0	0.220321	0.708797	0.358956
MD00G1084600	1	0	-0.915119	-0.354845	-0.510715			MD04G1239000	1	0	0.159207	0.870949	0.202948
MD13G1119000	1	0	-1.05708	0.60907	-0.390128			MD09G1002700	1	0	0.606709	1.34507	0.759399
MD09G1243900	1	0	-0.704863	0.15547	-0.448387			MD10G1145900	1	0	-0.0274842	0.637154	0.00320547
MD05G1348800	1	0	-1.1339	0.0256293	-0.475206			MD07G1303000	1	0	0.0777471	0.497068	0.0104665
MD15G1439700	1	0	-0.903351	-0.233475	-0.713754			MD03G1224600	1	0	0.33256	0.57896	0.787702
MD00G1181600	1	0	-1.44503	0.230906	-0.143904			MD14G1051400	1	0	0.218761	0.569786	0.0646607
MD06G1111700	1	0	-0.707708	-0.19611	-0.383262			MD04G1035200	1	0	0.426933	1.14043	0.649854
MD02G1058400	1	0	-1.29901	0.0742586	-0.60942			MD15G1214500	1	0	0.271556	0.908	-0.0455006
MD15G1266800	1	0	-1.31455	-0.247043	-0.45048			MD08G1211500	1	0	0.25876	0.949099	0.0989407
MD01G1195400	1	0	-0.763693	0.789963	-1.33295			MD17G1132400	1	0	0.176745	1.53164	0.547376
MD00G1013300	1	0	-0.863816	-0.346313	-0.529344			MD14G1088300	1	0	0.502507	1.37007	0.698005
MD10G1183200	1	0	-0.427482	0.545373	-0.313637			MD05G1121400	1	0	0.082699	1.03062	0.37693
MD16G1113400	1	0	-1.03532	0.379924	-0.643137			MD12G1129700	1	0	0.34047	0.680698	1.13108
MD07G1267100	1	0	-1.17074	0.716299	-1.05339			MD09G1156900	1	0	0.478037	0.54158	0.164326
MD02G1034300	1	0	-1.02754	0.756585	-0.9776			MD07G1233600	1	0	0.779156	-0.166317	0.561024
MD09G1250100	1	0	-0.856622	0.424591	-0.797973			MD11G1219900	1	0	-0.031793	0.956162	0.868347
MD08G1078700	1	0	-0.773462	-0.120683	-0.357428			MD07G1266700	1	0	0.345915	0.825084	0.588019
MD10G1088400	1	0	-0.834149	-0.133584	-0.401033			MD02G1068900	1	0	-0.42822	0.584212	0.205625
MD13G1038100	1	0	-0.278991	0.0848943	-0.754131			MD15G1076300	1	0	0.184611	0.686521	0.149096
MD16G1039300	1	0	-0.311902	0.186155	-0.600468			MD04G1155400	1	0	1.009	1.19247	0.838673
MD08G1035200	1	0	-0.565605	0.347407	-0.553066			MD04G1227900	1	0	0.647309	0.845672	0.80859
MD10G1342500	1	0	-0.836105	-0.0903402	-0.555536			MD00G1130600	1	0	0.331269	0.693223	0.964837
MD14G1229400	1	0	-0.674887	0.169002	-0.38104			MD14G1133200	1	0	0.166273	0.461207	0.183945
MD15G1190300	1	0	-0.916464	-0.17713	-0.677468			MD05G1340900	1	0	-0.116572	0.449327	0.127901
MD05G1341500	1	0	-0.611666	-0.168452	-1.2431			MD05G1338200	1	0	-0.0200404	0.390952	0.09822
MD16G1176800	1	0	-1.05855	-0.0336495	-0.582219			MD15G1364900	1	0	0.406063	0.352452	0.155534
MD02G1216800	1	0	-0.490505	-0.173664	-0.925705			MD05G1296600	1	0	0.746009	0.257954	1.57215
MD06G1094100	1	0	-0.912424	1.08181	-0.866618			MD06G1120700	1	0	0.472854	1.38632	0.249376
MD08G1021000	1	0	-0.756564	-0.00390073	-1.1337			MD10G1263000	1	0	0.205293	0.397555	0.134736
MD00G1140500	1	0	-0.921751	0.21241	-0.589534			MD10G1097200	1	0	0.367824	1.1685	0.0698425
MD15G1289500	1	0	-0.566589	0.503626	-1.10737			MD06G1166600	1	0	-0.0848271	0.91501	0.485935
MD13G1197800	1	0	-1.03999	0.120432	-0.641103			MD05G1143500	1	0	0.51844	0.239199	0.440456
MD06G1094600	1	0	-0.766469	0.652613	-0.527515			MD04G1177400	1	0	0.16085	0.874282	0.121341
MD05G1210400	1	0	-0.731259	0.0925464	-0.296258			MD15G1411200	1	0	-0.124912	0.969974	0.503684
MD12G1110900	1	0	-0.340028	0.378822	-0.845344			MD03G1067300	1	0	-0.120559	0.904138	0.19455
MD05G1086300	1	0	-0.343613	0.57979	-0.717247			MD08G1169700	1	0	0.240432	0.553851	-0.157384
MD04G1124500	1	0	-0.964702	-0.179443	-0.528661			MD15G1207800	1	0	0.611997	0.755891	0.686274
MD06G1199700	1	0	-0.75302	0.716403	-0.131021			MD01G1110900	1	0	0.875045	0.561331	0.571305
MD11G1082600	1	0	0.0323269	0.646001	-0.786345			MD02G1032700	1	0	0.550038	0.914377	0.282115
MD05G1336300	1	0	-0.880231	0.0854379	-0.407418			MD12G1190400	1	0	0.547744	0.881651	0.0666359
MD11G1154700	1	0	-1.01029	0.460622	-0.610979			MD12G1132900	1	0	0.659949	1.25874	0.539169
MD12G1160100	1	0	-0.994653	0.309341	-1.09412			MD11G1081100	1	0	0.161621	0.56411	0.0244064
MD00G1142500	1	0	-1.56968	-0.315992	0.172279			MD16G1050700	1	0	0.0853988	1.10335	-0.0433344
MD13G1220400	1	0	-1.02801	0.163695	0.178131			MD04G1126800	1	0	0.63336	1.06219	0.545449
MD12G1089300	1	0	-1.26117	0.0409644	-0.241588			MD14G1001000	1	0	-0.53847	1.11853	-0.0842511
MD06G1230500	1	0	-0.739939	0.0397879	-0.427747			MD11G1095900	1	0	0.569401	0.989681	0.285033
MD10G1269300	1	0	-0.598998	0.141291	-1.08871			MD14G1223700	1	0	0.130242	0.599202	0.26133
MD08G1061500	1	0	-0.538744	0.35663	-0.68795			MD15G1275400	1	0	0.293392	0.368153	-0.0986527
MD07G1044900	1	0	-1.21164	-0.376244	-0.178945			MD11G1172800	1	0	-0.0672735	0.686105	0.132213
MD00G1045300	1	0	-0.884078	0.0807835	0.0382252			MD02G1187800	1	0	0.324448	0.621277	0.0176061
MD14G1046200	1	0	-0.797871	-0.225146	-0.25136			MD00G1200100	1	0	-0.582687	0.862201	-0.303957
MD07G1224900	1	0	-1.78174	0.0341748	-0.232336			MD03G1102500	1	0	0.335917	0.331309	1.02033
MD16G1259200	1	0	-1.34019	0.384701	-0.165638			MD06G1027300	1	0	-0.991822	0.595836	0.346632
MD14G1017600	1	0	-0.393552	0.482719	-1.13514			MD08G1098800	1	0	0.217416	0.572974	0.54145
MD08G1226900	1	0	-0.989303	-0.177135	-0.483464			MD12G1209800	1	0	0.343618	0.72954	0.153112
MD01G1082200	1	0	-0.664116	0.263646	-0.4932			MD16G1132600	1	0	-0.468378	0.572571	0.187393
MD17G1017000	1	0	-1.21747	0.440891	-0.30768			MD04G1154300	1	0	0.163633	1.32635	0.547906
MD01G1143600	1	0	-0.621195	1.02212	-0.437366			MD08G1017000	1	0	-0.130388	0.622045	0.0317779
MD15G1160100	1	0	-0.909771	-0.021244	-0.569224			MD03G1226000	1	0	0.0152635	0.663474	0.349052
MD04G1014100	1	0	-0.814932	-0.135533	-0.725913			MD04G1165400	1	0	0.368543	0.488599	-0.360728
MD15G1087800	1	0	-1.19532	0.234333	-0.556458			MD10G1304000	1	0	0.1002	0.628492	0.226797
MD15G1180000	1	0	-1.79939	-0.647586	0.0293529			MD05G1055800	1	0	0.578519	0.345547	1.39209
MD02G1137700	1	0	-0.536392	-0.0940286	-0.429123			MD01G1078900	1	0	-0.437814	0.592294	-0.305042
MD03G1083600	1	0	-1.10518	0.16202	-0.727852			MD01G1194600	1	0	0.794295	-0.259521	0.346055
MD02G1165300	1	0	-1.66372	0.241069	-0.629937			MD09G1063000	1	0	-0.0914517	0.287351	0.123295
MD08G1227800	1	0	-0.811529	-0.180757	-0.862241			MD15G1021100	1	0	0.472098	0.684986	0.845516
MD12G1117700	1	0	-2.16966	-0.22222	-0.236479			MD13G1237300	1	0	0.599425	0.897739	0.254568
MD16G1145200	1	0	-1.55077	0.349344	0.365616			MD09G1180900	1	0	0.77874	0.381871	0.56944
MD08G1221300	1	0	-0.634516	0.567423	-0.71683			MD08G1004200	1	0	0.71046	0.849845	0.465842
MD15G1372900	1	0	-1.16666	0.271167	-0.368537			MD01G1185500	1	0	-0.168358	0.633596	0.737408
MD05G1283700	1	0	-1.21317	-0.0294682	-0.469391			MD03G1219300	1	0	0.0430842	0.73145	0.0458319
MD06G1211700	1	0	0.133704	-0.130421	-1.39183			MD13G1082000	1	0	0.231727	0.655288	0.0307567
MD06G1105900	1	0	-0.846795	0.769341	-0.368278			MD03G1259000	1	0	-0.195981	1.07711	-0.160339
MD02G1088900	1	0	-1.53341	-0.278662	0.366451			MD10G1132000	1	0	0.691259	0.351554	0.669218
MD09G1016700	1	0	-0.732556	-0.0426139	-1.13847			MD16G1040400	1	0	0.898261	0.852919	0.808622
MD15G1096800	1	0	-1.14208	0.0509284	-0.639789			MD15G1156100	1	0	-0.0518613	0.770272	0.371967
MD16G1252700	1	0	-0.722117	-0.134669	-0.498825			MD16G1015100	1	0	0.486345	1.19462	0.172463
MD08G1155300	1	0	-1.01537	0.500956	-0.235743			MD13G1092000	1	0	0.866656	0.523703	0.59101
MD12G1093900	1	0	-1.51488	0.0659602	-0.0767612			MD01G1049600	1	0	0.314705	0.444477	0.259716
MD14G1021600	1	0	-0.970972	0.0665451	-0.446423			MD15G1384100	1	0	-0.0804585	0.436056	0.311225
MD09G1054400	1	0	-0.948021	0.439431	-1.06907			MD01G1190900	1	0	-0.111923	0.470673	0.220026
MD03G1023300	1	0	-0.677499	-0.0287252	-1.2034			MD11G1313800	1	0	0.541586	0.364125	1.00812
MD14G1190700	1	0	-1.74595	0.0444647	0.224605			MD04G1095100	1	0	0.211277	0.693844	0.436571
MD05G1238600	1	0	-1.14863	0.0927396	-0.786912			MD10G1153400	1	0	0.119704	0.792773	-0.0477889
MD04G1065500	1	0	-1.3718	0.211758	-0.130933			MD07G1140300	1	0	0.50998	0.470238	0.153657
MD06G1089500	1	0	-1.61857	0.089652	-0.377325			MD09G1261900	1	0	0.479721	1.09169	0.110073
MD07G1209500	1	0	-0.7037	-0.102753	-0.441915			MD08G1124700	1	0	0.775868	0.886777	0.917072
MD05G1264200	1	0	-0.618007	-0.132417	-0.441682			MD16G1010800	1	0	0.242282	0.784149	-0.0866282
MD07G1004800	1	0	-0.763577	0.725563	-0.0234895			MD01G1032800	1	0	0.355423	1.50945	0.386658
MD07G1077800	1	0	-0.826626	0.0214356	-0.477658			MD15G1247100	1	0	0.476327	0.159183	0.174638
MD07G1018000	1	0	-1.96608	0.491927	-0.246131			MD01G1056600	1	0	0.409256	0.938061	0.275207
MD08G1196600	1	0	-0.903091	-0.0916733	-0.73362			MD00G1047400	1	0	0.0899634	0.483128	0.0457158
MD11G1273800	1	0	-1.11488	0.553921	-1.33266			MD11G1249800	1	0	-0.0636917	0.813466	0.323828
MD08G1081400	1	0	-1.28764	-0.0928046	-0.450827			MD15G1089000	1	0	0.126707	0.657345	0.56453
MD13G1265500	1	0	-1.38416	0.345499	-0.460542			MD17G1019100	1	0	0.212106	0.592781	0.0492585
MD04G1117200	1	0	-1.27438	0.283088	-0.952605			MD04G1224700	1	0	0.531991	0.212202	0.390626
MD11G1028500	1	0	-1.14135	0.233073	-0.598177			MD15G1095000	1	0	-0.136448	0.924215	-0.215293
MD13G1146600	1	0	-0.599281	-0.0433012	-0.312169			MD16G1000500	1	0	0.543499	0.5439	0.478765
MD02G1317900	1	0	-0.856757	0.255313	-0.202517			MD01G1108900	1	0	0.627049	1.00748	0.0492455
MD17G1039800	1	0	-2.05633	0.0823647	0.012947			MD14G1035500	1	0	0.56174	0.533184	0.229448
MD10G1324400	1	0	-1.06937	-0.139371	-0.00265931			MD10G1036100	1	0	0.36712	0.524061	0.157344
MD13G1052900	1	0	-0.671725	0.517094	-0.768611			MD17G1230100	1	0	0.771669	0.986163	1.01041
MD01G1049300	1	0	-0.0664407	0.40439	-1.87774			MD11G1033600	1	0	-0.161215	0.65712	0.142058
MD03G1230600	1	0	-0.843579	-0.035263	-0.847742			MD15G1063500	1	0	0.242416	0.329121	-0.102085
MD10G1212300	1	0	-0.76397	-0.0362711	-0.385223			MD03G1224200	1	0	0.382933	0.599615	1.44475
MD06G1026200	1	0	-0.337163	0.534405	-0.669211			MD14G1010600	1	0	0.427323	1.01989	0.263415
MD05G1348500	1	0	-0.434018	0.451434	-0.490335			MD17G1086700	1	0	0.90697	0.621135	0.318392
MD03G1251300	1	0	-0.713147	0.350849	-0.660442			MD02G1122800	1	0	0.102427	0.738667	0.0492175
MD10G1275900	1	0	-0.746408	0.768143	-0.538886			MD16G1246100	1	0	0.20151	0.770992	0.267972
MD07G1005600	1	0	-1.3676	-0.156165	-0.377436			MD11G1123600	1	0	0.32056	1.24909	-0.0947154
MD15G1061800	1	0	-1.93666	0.193546	-0.230567			MD02G1246200	1	0	0.234371	0.325643	0.105449
MD06G1169600	1	0	-0.777725	0.248707	-0.276506			MD14G1082800	1	0	0.372421	0.473438	-0.355416
MD06G1134600	1	0	-1.17892	0.718057	-1.34944			MD04G1154900	1	0	0.812278	0.563466	0.727477
MD15G1057200	1	0	-1.81656	0.35071	0.188567			MD16G1285000	1	0	0.432114	1.53453	0.553428
MD01G1110700	1	0	-1.13595	0.192929	-0.642978			MD04G1097800	1	0	-0.290743	0.380997	1.21035
MD09G1049000	1	0	-0.758196	-0.165914	-1.14369			MD08G1096700	1	0	0.139484	0.728308	0.203379
MD05G1056900	1	0	-1.51643	0.0449266	-0.136811			MD07G1278400	1	0	0.39697	0.550736	0.00726312
MD14G1177900	1	0	-0.969826	0.10398	-0.782378			MD03G1288600	1	0	0.405394	1.05275	0.241949
MD15G1154700	1	0	-0.802673	0.322196	-1.18582			MD02G1247300	1	0	0.330906	0.520667	0.418615
MD10G1043200	1	0	-0.872111	-0.214735	-2.00517			MD03G1120000	1	0	0.829328	0.620213	1.46105
MD03G1105800	1	0	-0.948658	-0.104662	-0.328829			MD02G1315100	1	0	0.484848	0.324488	0.439398
MD07G1152100	1	0	-2.05219	0.113143	-0.663338			MD10G1142000	1	0	0.413042	1.1542	0.49363
MD02G1315200	1	0	-0.183943	0.0559902	-1.63731			MD15G1085600	1	0	0.0578901	0.726035	0.758694
MD15G1215500	1	0	-0.885208	0.000970051	-0.770187			MD10G1035800	1	0	-0.2536	1.91317	0.761956
MD08G1089900	1	0	-1.22342	0.486666	-1.40451			MD13G1214600	1	0	-0.0662586	0.589065	-0.00265875
MD05G1015400	1	0	-1.82745	-0.146825	-0.388353			MD11G1002300	1	0	1.24437	1.01776	0.0431525
MD03G1297100	1	0	-0.625222	0.176905	-1.08567			MD03G1144700	1	0	0.0864437	0.932171	0.404955
MD16G1067100	1	0	-1.17824	0.678638	-0.701957			MD03G1129900	1	0	0.246769	0.575379	0.581603
MD07G1181200	1	0	-0.729154	0.325433	-0.651456			MD07G1141400	1	0	0.493437	0.484386	-0.0255251
MD01G1087300	1	0	-1.34758	-0.737065	-0.0780523			MD06G1052700	1	0	1.0652	1.0458	-0.0663952
MD04G1055700	1	0	-0.973687	0.670223	-0.247061			MD04G1062600	1	0	0.342927	0.811143	0.0540938
MD00G1083700	1	0	-0.997808	-0.205119	-0.537342			MD07G1162400	1	0	0.20547	0.975837	0.634943
MD04G1165900	1	0	-1.29929	-0.305635	-0.12689			MD11G1124400	1	0	0.231373	1.14104	-0.15486
MD03G1217300	1	0	-0.790327	1.06725	-0.336418			MD10G1062300	1	0	-0.552441	0.658995	-0.276897
MD17G1010500	1	0	-0.131428	-0.0518684	-0.799402			MD02G1189000	1	0	-0.41055	0.56328	0.286555
MD01G1002400	1	0	-0.673324	0.0628927	-0.640269			MD08G1022900	1	0	0.202369	0.57593	-0.214596
MD10G1062500	1	0	-1.27842	0.427891	-0.544098			MD14G1115400	1	0	0.135466	0.480575	1.14566
MD00G1025200	1	0	-0.779376	0.477909	-0.433839			MD15G1014200	1	0	-0.0825812	1.25726	0.44188
MD04G1098100	1	0	-1.55231	-0.0941736	-0.376273			MD15G1294900	1	0	0.421542	0.836685	0.374453
MD11G1051800	1	0	-0.540618	0.159857	-0.763084			MD02G1028000	1	0	0.111639	0.439785	0.0991618
MD07G1294700	1	0	-0.880112	0.296383	-0.498992			MD17G1154800	1	0	0.00841411	0.578427	0.307064
MD01G1088900	1	0	-0.39247	0.414963	-0.934248			MD17G1098300	1	0	0.609425	0.800485	0.159663
MD15G1414200	1	0	-0.945375	1.05443	-0.324426			MD10G1011000	1	0	-0.209861	0.770869	0.455706
MD04G1208600	1	0	-1.00861	1.02736	-0.188237			MD17G1283400	1	0	0.452543	0.729406	0.38839
MD12G1119900	1	0	-0.763055	0.129129	-0.750986			MD09G1137100	1	0	0.44124	0.853324	-0.100187
MD05G1271800	1	0	-1.07904	0.374052	-0.67287			MD17G1237100	1	0	0.819403	0.727007	1.57995
MD09G1194900	1	0	-0.547604	0.609689	-1.19414			MD10G1309000	1	0	0.069633	0.738119	0.562211
MD15G1197500	1	0	-0.568331	0.194847	-0.51157			MD04G1060300	1	0	0.474012	0.9227	0.597101
MD08G1046300	1	0	-1.55711	0.0130638	0.126792			MD16G1075100	1	0	0.22844	0.75688	0.162869
MD11G1095300	1	0	-1.55725	0.395714	-0.862381			MD11G1067000	1	0	0.115729	0.639089	0.251006
MD12G1254900	1	0	-0.35018	0.485259	-0.754259			MD15G1316600	1	0	0.123962	0.572974	0.191771
MD06G1236500	1	0	-0.928203	-0.0862749	-0.135065			MD11G1171900	1	0	0.172315	1.3789	0.445936
MD06G1185000	1	0	-0.495166	0.681829	-1.28949			MD12G1056600	1	0	0.0111382	0.971017	0.141238
MD06G1135200	1	0	-0.985072	-0.103727	-0.609935			MD03G1089300	1	0	0.617431	0.948511	0.917473
MD12G1099400	1	0	-1.03115	0.049319	-0.396953			MD01G1085700	1	0	0.326336	0.315334	0.0505327
MD14G1202700	1	0	-0.811423	0.436735	-0.638222			MD03G1269700	1	0	0.634684	1.36513	0.557951
MD12G1205600	1	0	-1.03583	0.230756	-0.497617			MD05G1211000	1	0	0.507216	1.43635	0.219604
MD01G1083900	1	0	-0.710473	0.547919	-0.375068			MD08G1213100	1	0	0.148318	0.423163	-0.00391774
MD15G1403900	1	0	-0.955772	0.436856	-0.189377			MD00G1012300	1	0	-0.145858	0.433596	0.186228
MD11G1027000	1	0	-0.809911	0.0294969	-0.794309			MD16G1095000	1	0	0.940804	0.522678	1.52426
MD07G1085900	1	0	-0.60983	0.0719398	-0.499408			MD02G1264400	1	0	0.0992331	0.984613	-0.13087
MD16G1274700	1	0	-1.00757	0.0499298	-0.428071			MD08G1096000	1	0	-0.373538	0.424797	0.711948
MD10G1068900	1	0	-0.714349	0.189131	-0.636611			MD02G1000600	1	0	-0.232597	0.631413	-0.0630096
MD16G1107400	1	0	-1.20009	0.100944	-0.311537			MD05G1037300	1	0	0.4693	0.33521	-0.068157
MD17G1030900	1	0	-1.21172	0.427454	-0.544246			MD09G1271400	1	0	0.819368	0.726716	0.971438
MD10G1240800	1	0	-0.734497	0.0628688	-0.991402			MD04G1142600	1	0	0.6242	1.29678	0.665974
MD14G1008200	1	0	-1.65053	-0.104524	0.550164			MD13G1141400	1	0	0.416753	0.141797	0.355887
MD05G1322800	1	0	-1.18319	0.15269	0.181501			MD06G1218600	1	0	0.705652	0.799019	0.766653
MD13G1168400	1	0	-0.945594	-0.0308321	-0.263988			MD15G1061700	1	0	0.720269	0.423905	0.628216
MD02G1065500	1	0	-1.19469	0.161428	-0.704976			MD04G1123300	1	0	-0.0454561	0.467771	0.305526
MD03G1185500	1	0	-1.18122	0.115667	-0.0844767			MD13G1020700	1	0	0.474813	0.444109	0.226539
MD02G1264800	1	0	-1.66501	0.60719	0.194529			MD17G1226500	1	0	0.205922	0.582078	0.537251
MD13G1201500	1	0	-1.4301	0.468533	-0.733752			MD10G1241200	1	0	0.213	0.714149	0.184299
MD05G1064700	1	0	-1.03585	-0.00682943	-0.651925			MD06G1044400	1	0	0.708302	1.39647	0.710393
MD01G1194700	1	0	-0.767218	0.335675	-0.971392			MD12G1168300	1	0	0.617688	1.11463	0.446812
MD16G1000600	1	0	-1.22318	0.0866644	-0.460629			MD10G1324500	1	0	0.640854	1.42484	0.610585
MD17G1235500	1	0	-0.624119	0.494785	-0.846055			MD07G1049200	1	0	0.0591813	0.775345	0.3754
MD11G1316800	1	0	-0.603537	0.0759164	-0.446428			MD13G1036200	1	0	0.524612	0.254943	0.141831
MD05G1337300	1	0	-0.871621	0.242762	-0.680438			MD15G1375600	1	0	-0.242304	0.461404	0.0564101
MD10G1256600	1	0	-0.342596	0.574648	-0.218541			MD05G1032300	1	0	0.101184	0.999996	0.132446
MD17G1259800	1	0	-0.71516	-0.16513	-0.49406			MD17G1149100	1	0	0.680283	0.725393	1.41758
MD04G1226600	1	0	-0.312604	-0.144991	-0.897665			MD01G1108800	1	0	0.68976	0.693869	0.164433
MD03G1120900	1	0	-1.19027	0.308723	-0.478797			MD02G1141600	1	0	0.32332	0.882124	0.27876
MD12G1196800	1	0	-1.36778	0.349058	-0.3661			MD13G1255400	1	0	0.306787	0.508642	0.0800348
MD09G1011500	1	0	-0.617762	0.246497	-0.429101			MD15G1373300	1	0	0.599098	0.410557	-0.0940763
MD11G1283800	1	0	-0.953456	0.253565	-0.831967			MD02G1119800	1	0	-0.57526	0.580896	-0.175054
MD07G1060900	1	0	-0.924441	0.0173576	-0.403241			MD09G1045200	1	0	0.665293	1.31128	0.577939
MD14G1212400	1	0	-1.04026	0.460991	-0.967641			MD02G1113300	1	0	0.29124	0.962188	0.0117653
MD03G1195300	1	0	-1.9125	-0.357324	-0.338322			MD03G1209200	1	0	-0.092146	1.69124	0.621869
MD07G1259500	1	0	-1.22578	0.669126	-0.33976			MD10G1085800	1	0	-0.688572	0.763081	0.0210886
MD11G1317900	1	0	-1.14507	-0.109563	-0.172283			MD10G1194100	1	0	0.87424	0.543265	0.475784
MD03G1105500	1	0	-0.850566	0.24823	-1.13927			MD08G1022700	1	0	0.119715	0.470681	-0.265615
MD12G1202600	1	0	-1.27395	0.254593	-0.653783			MD08G1181400	1	0	0.381488	0.860447	0.289896
MD08G1165500	1	0	-0.922696	0.256752	-0.910832			MD16G1202100	1	0	0.786617	0.65365	0.338939
MD14G1099400	1	0	-0.255129	0.33293	-0.95592			MD13G1050200	1	0	0.741928	0.497751	1.3079
MD00G1116400	1	0	-0.700915	0.552376	-0.687727			MD08G1084900	1	0	0.230023	0.571753	0.523844
MD09G1035900	1	0	-1.43664	0.476068	-0.899229			MD16G1111100	1	0	0.432938	0.335257	-0.182608
MD07G1246400	1	0	-1.26797	-0.132487	-0.61906			MD06G1091200	1	0	0.366622	1.61755	0.0333075
MD11G1308400	1	0	-1.20101	-0.122607	0.0262818			MD08G1196300	1	0	0.173417	0.85885	0.513974
MD12G1190700	1	0	-1.20899	0.0851467	0.355344			MD12G1162000	1	0	-0.278308	0.437861	0.288398
MD10G1323700	1	0	-1.20775	0.29751	-0.629094			MD07G1022700	1	0	0.608132	0.0779684	0.409932
MD15G1121200	1	0	-0.640624	0.297648	-0.421852			MD10G1284500	1	0	0.313458	0.698821	1.06223
MD15G1189200	1	0	-1.67914	0.142076	-0.64769			MD15G1048500	1	0	-0.487399	0.739418	-0.228659
MD06G1219700	1	0	-0.767831	0.328424	-0.446733			MD13G1207700	1	0	0.96998	0.642455	1.45994
MD05G1322700	1	0	-0.653428	0.00945044	-0.347662			MD16G1257600	1	0	0.641212	-0.0477671	0.498712
MD11G1090500	1	0	-0.719628	-0.108916	-0.854267			MD16G1093600	1	0	0.385232	0.900739	0.264401
MD01G1021600	1	0	-0.39743	-0.196379	-0.729192			MD15G1446000	1	0	0.0312651	0.614896	0.137947
MD02G1166700	1	0	-1.45371	-0.788769	0.011602			MD15G1175300	1	0	0.738784	1.06306	0.532564
MD13G1096800	1	0	-0.911362	0.892558	-0.152969			MD08G1163300	1	0	0.19857	0.628657	0.164917
MD17G1235800	1	0	-0.797922	-0.011396	-0.521063			MD06G1178200	1	0	0.290982	0.873171	0.360728
MD04G1144100	1	0	-0.912164	0.38706	-0.953934			MD14G1069300	1	0	0.613634	0.518326	0.386817
MD09G1261500	1	0	-1.22475	0.367543	0.162673			MD03G1006300	1	0	0.425278	0.460629	0.00673743
MD10G1093900	1	0	-0.750648	0.76562	-0.18558			MD11G1275800	1	0	0.375673	0.835983	0.39998
MD06G1125900	1	0	-1.12298	0.404679	0.0845459			MD01G1061400	1	0	0.456313	0.581788	0.705023
MD13G1097000	1	0	-1.46124	0.384052	-0.415288			MD10G1098900	1	0	0.36228	0.661429	0.649292
MD09G1098400	1	0	-0.408688	0.222872	-0.647286			MD06G1147900	1	0	0.577556	0.358444	0.638812
MD10G1311800	1	0	-1.18487	0.0804366	-0.605648			MD16G1283300	1	0	0.0157396	1.29471	0.53316
MD00G1065300	1	0	-0.610836	0.760161	-0.763939			MD15G1436600	1	0	-0.00101	0.710189	1.3456
MD09G1158600	1	0	-0.656097	0.436006	-0.991975			MD01G1228200	1	0	0.247477	0.690059	-0.0653626
MD03G1288300	1	0	-1.42397	0.120921	0.399447			MD14G1049700	1	0	-0.591024	0.572148	0.635515
MD10G1201800	1	0	-0.916878	0.89813	-0.343099			MD16G1138000	1	0	0.489261	0.549659	0.260894
MD06G1207200	1	0	-0.65567	0.0161153	-0.39638			MD04G1033500	1	0	0.471428	0.637417	0.336345
MD02G1073300	1	0	-0.649659	-0.249082	-1.14427			MD16G1127800	1	0	0.141503	0.529505	0.180231
MD10G1129700	1	0	-0.737104	-0.0501093	-0.258726			MD01G1072100	1	0	-0.464901	0.452315	0.288481
MD11G1176900	1	0	-0.637046	0.374673	-0.539774			MD05G1115400	1	0	0.121555	0.655674	-0.00371423
MD13G1164900	1	0	-0.825862	0.209828	-0.423672			MD06G1069300	1	0	0.402143	0.926436	0.684594
MD07G1248200	1	0	-0.952668	-0.565532	-0.407406			MD09G1004000	1	0	0.331662	0.82031	0.389629
MD12G1079400	1	0	-1.05837	0.0931366	-0.0977924			MD00G1143700	1	0	0.549458	0.517034	0.38962
MD13G1090000	1	0	-0.963961	0.317513	-0.124327			MD09G1037000	1	0	0.453076	1.38496	0.441352
MD14G1146900	1	0	-1.207	0.553876	-0.39806			MD06G1103400	1	0	0.460256	0.448308	0.737628
MD08G1091200	1	0	-0.968929	-0.14416	-0.814708			MD10G1022000	1	0	-0.26346	0.897046	0.225008
MD12G1196300	1	0	-0.564359	-0.242228	-0.762388			MD02G1113800	1	0	0.494834	1.316	0.669532
MD01G1100100	1	0	-0.940821	0.27116	-0.350803			MD06G1178100	1	0	0.155586	0.824747	0.143112
MD09G1110800	1	0	-1.13741	0.401807	-0.72828			MD09G1284000	1	0	0.321084	0.495607	0.0106351
MD15G1110200	1	0	-0.709816	0.435409	-0.81875			MD01G1236600	1	0	0.987538	0.789316	0.950116
MD13G1050400	1	0	-1.43075	1.04242	-0.822482			MD00G1038300	1	0	-0.0690618	1.32318	0.350735
MD07G1277100	1	0	-0.557653	0.252502	-0.714192			MD15G1010100	1	0	0.244882	1.19832	0.270306
MD09G1005700	1	0	-2.02154	0.112915	-0.0870194			MD01G1204000	1	0	0.849785	0.630671	0.570262
MD01G1028300	1	0	-1.60817	0.0623467	-0.428296			MD00G1025800	1	0	0.5874	0.938408	0.0663409
MD08G1153600	1	0	-0.542529	-0.0155575	-1.41706			MD12G1171500	1	0	0.92665	0.561213	1.47822
MD05G1047200	1	0	-1.23154	-0.386177	-0.152116			MD12G1006100	1	0	0.465561	1.0868	0.336873
MD15G1339400	1	0	-0.396907	0.317404	-0.833373			MD05G1042900	1	0	0.396885	1.28994	0.65689
MD11G1067400	1	0	-0.620338	0.75042	-0.118629			MD15G1137800	1	0	-0.0348772	0.378182	0.0196516
MD14G1014500	1	0	-0.50276	0.972504	-0.758932			MD10G1079900	1	0	0.328966	0.781974	0.480909
MD04G1234400	1	0	-1.59072	-0.106366	-0.0609537			MD15G1284800	1	0	0.9255	0.696607	1.04679
MD13G1205000	1	0	-0.940271	-0.40406	-1.44538			MD02G1048900	1	0	0.498299	0.976726	0.352606
MD03G1048900	1	0	0.221564	0.100313	-0.962847			MD06G1041000	1	0	0.331373	1.02989	0.639413
MD13G1095600	1	0	-1.21823	0.315329	-0.337245			MD15G1164900	1	0	0.415904	0.69056	0.726041
MD13G1010900	1	0	-0.918998	-0.484816	-1.44637			MD03G1152000	1	0	0.214045	0.344953	0.906864
MD00G1034500	1	0	-1.64687	0.922966	0.284154			MD13G1133000	1	0	0.920795	1.1951	0.480502
MD16G1122000	1	0	-1.4557	0.589052	-0.711547			MD06G1046300	1	0	0.405262	0.330031	0.193532
MD15G1052100	1	0	-0.914265	0.420333	-1.15323			MD12G1253100	1	0	0.395408	1.09594	0.701342
MD06G1035600	1	0	-0.231483	0.40703	-0.507767			MD10G1268900	1	0	0.77804	0.324952	0.601181
MD10G1296300	1	0	-1.58286	-0.314908	0.408082			MD10G1198500	1	0	0.0338136	0.890767	0.392506
MD10G1067800	1	0	-0.641973	0.103362	-0.442097			MD03G1191400	1	0	0.478499	1.41138	0.0557503
MD12G1223000	1	0	-0.403093	-1.05601	-2.16667			MD08G1176000	1	0	0.40053	0.974463	0.537383
MD02G1134100	1	0	-0.844037	0.2481	-0.450146			MD04G1004800	1	0	0.597124	1.30791	0.725022
MD03G1162200	1	0	-0.843529	0.22276	-0.386772			MD05G1264500	1	0	-0.0916014	0.834533	0.346638
MD04G1079100	1	0	-0.573673	-0.52344	-1.50447			MD13G1046900	1	0	-0.310192	0.709241	-0.207065
MD16G1027000	1	0	-0.836928	0.0401316	-0.469633			MD12G1163000	1	0	0.196675	1.26573	0.13729
MD14G1182200	1	0	-0.682268	-0.0195759	-1.1657			MD13G1034700	1	0	0.419895	0.595765	0.0493595
MD06G1163300	1	0	-0.670973	-0.346879	-1.29661			MD11G1072100	1	0	0.363851	0.851823	0.473314
MD09G1213800	1	0	-0.692105	-0.141913	-0.61925			MD03G1092100	1	0	0.251067	0.916268	0.347559
MD04G1169800	1	0	-0.949213	0.216973	0.020135			MD07G1156200	1	0	0.272673	0.792972	0.77312
MD10G1240900	1	0	-0.795966	-0.291766	-0.129763			MD14G1205500	1	0	0.539282	0.595615	1.55992
MD15G1429000	1	0	-1.1812	-0.548605	-0.188632			MD09G1006400	1	0	0.649536	0.788474	0.955912
MD09G1286100	1	0	-1.14871	0.425693	0.0616954			MD15G1444500	1	0	0.339897	0.633541	0.805882
MD10G1002300	1	0	-0.664311	0.0354356	-0.492469			MD05G1203100	1	0	0.415748	0.629686	0.442983
MD17G1210000	1	0	-0.839162	0.0333858	-0.608152			MD06G1054100	1	0	-0.0737274	0.529015	0.181401
MD01G1170100	1	0	-0.986878	-0.175194	-0.517858			MD14G1055500	1	0	0.0549803	0.575074	0.120389
MD05G1006800	1	0	-0.863104	0.0059464	-0.166783			MD12G1112400	1	0	0.340587	0.679504	0.326357
MD02G1165900	1	0	-2.05273	-0.129236	-0.101906			MD01G1162900	1	0	-0.180391	0.607965	0.100051
MD11G1308200	1	0	-1.13166	0.718279	-1.27526			MD16G1054700	1	0	0.0953925	0.587221	0.134956
MD04G1031500	1	0	-0.605098	0.206284	-0.581138			MD10G1128700	1	0	0.409321	0.979903	0.355798
MD15G1147000	1	0	-0.0797593	0.29883	-0.862047			MD09G1072700	1	0	0.669361	1.37838	0.79115
MD12G1221800	1	0	-2.04029	-0.50802	-0.394826			MD11G1311400	1	0	0.328672	0.610002	0.195407
MD11G1173000	1	0	-1.89954	0.626939	-0.459605			MD12G1199200	1	0	-0.130452	1.04944	0.226251
MD15G1046700	1	0	-0.701813	-0.130281	-0.892199			MD15G1275300	1	0	0.351109	0.537763	0.524035
MD04G1076300	1	0	-0.0988619	0.226595	-0.528861			MD06G1215300	1	0	0.447735	0.421328	-0.154073
MD10G1198400	1	0	-0.0666952	0.212477	-0.575166			MD08G1057500	1	0	0.0869214	0.754296	0.352586
MD09G1266400	1	0	-1.52444	0.845481	-0.124019			MD06G1093600	1	0	0.913666	1.00848	0.175158
MD14G1110400	1	0	-0.827383	-0.146466	-0.60021			MD08G1213600	1	0	0.398105	0.447776	0.555482
MD08G1029900	1	0	-1.55073	0.123824	-0.386097			MD10G1147700	1	0	0.3779	1.15459	0.441743
MD09G1115300	1	0	-1.2182	0.437648	-0.829142			MD09G1032900	1	0	0.242694	0.527781	0.228213
MD17G1156400	1	0	0.0879831	0.231947	-0.602545			MD13G1082100	1	0	0.420676	0.900719	-0.00798233
MD17G1227000	1	0	-0.839185	0.0264797	-0.534187			MD15G1394100	1	0	0.241657	0.611544	0.581512
MD04G1058200	1	0	-1.07058	0.40191	-0.906736			MD11G1316100	1	0	0.114828	0.55143	0.838379
MD16G1256300	1	0	-0.982377	-0.310712	-0.386833			MD12G1256200	1	0	0.505939	0.752294	0.37935
MD16G1139300	1	0	-0.679873	0.00575118	-0.371264			MD13G1163500	1	0	0.145404	0.781285	0.277006
MD12G1048600	1	0	-1.01425	-0.0629934	-0.52781			MD10G1069900	1	0	-0.0403921	0.614889	0.355196
MD04G1227900	1	0	-0.817491	1.15279	-0.361396			MD10G1105600	1	0	0.12679	0.530412	0.286474
MD12G1224200	1	0	-0.517655	-0.0824051	-1.33134			MD05G1226800	1	0	0.45537	0.756345	0.372774
MD06G1163800	1	0	-0.988578	0.771544	-0.700944			MD10G1133200	1	0	0.596309	0.243668	0.241236
MD17G1010000	1	0	-0.743912	0.123964	-0.954351			MD14G1158700	1	0	0.976705	-0.167607	0.390091
MD17G1156200	1	0	-0.663703	0.275406	-0.310508			MD05G1255900	1	0	0.479808	0.330563	0.594282
MD14G1133200	1	0	-1.9356	-0.196672	0.558045			MD16G1082400	1	0	0.535188	0.770762	0.900091
MD09G1232700	1	0	-1.01173	0.191642	-0.606244			MD14G1080900	1	0	0.141906	1.18285	0.426728
MD12G1133800	1	0	0.0176228	-0.298137	-0.982258			MD02G1014800	1	0	0.150735	0.892041	0.857681
MD08G1046400	1	0	-1.02094	-0.0397234	-0.170057			MD01G1059700	1	0	0.319067	0.301667	-0.093345
MD15G1364900	1	0	-1.10302	0.215339	0.176207			MD15G1018600	1	0	0.00496164	0.632583	0.261564
MD17G1039000	1	0	-0.975805	-0.167492	-0.778915			MD17G1167100	1	0	0.645145	-0.0635808	0.578826
MD15G1130200	1	0	-1.57947	-0.145515	0.0222597			MD03G1246700	1	0	0.214076	0.542983	0.414877
MD07G1145100	1	0	-0.827381	0.10483	-0.769536			MD01G1121900	1	0	0.582747	0.62843	0.697276
MD05G1296600	1	0	-0.717662	1.25596	-0.580396			MD15G1070400	1	0	0.452398	0.505648	0.200704
MD14G1128100	1	0	-1.03085	0.22326	-0.0559475			MD16G1192800	1	0	0.39249	0.0933201	1.45206
MD06G1125700	1	0	0.0429821	0.137424	-0.84094			MD00G1061600	1	0	0.472192	0.607508	-0.00189484
MD10G1263000	1	0	-1.65995	0.600497	0.10735			MD01G1196300	1	0	0.827256	0.569747	0.0630031
MD04G1006800	1	0	-0.895528	0.0258709	-0.155836			MD11G1204900	1	0	0.705064	1.296	0.230172
MD05G1143500	1	0	-0.599336	0.564671	-0.235837			MD03G1171500	1	0	0.682146	1.1867	0.0704058
MD16G1130300	1	0	-0.615899	-0.16062	-0.248677			MD00G1152300	1	0	0.40871	0.630657	0.541071
MD08G1078300	1	0	-0.537412	-0.242861	-0.736883			MD01G1076500	1	0	0.249348	0.441805	-0.0912775
MD15G1133100	1	0	-0.870544	0.164029	-0.689524			MD15G1071300	1	0	0.575404	0.919755	0.154175
MD11G1097600	1	0	-0.644811	0.605795	-0.571482			MD04G1008800	1	0	0.00368547	0.501258	0.934303
MD09G1201800	1	0	-0.790781	-0.0618234	-0.437325			MD02G1112100	1	0	0.378798	0.884337	0.225883
MD07G1057700	1	0	-0.567983	0.115846	-0.829792			MD00G1008000	1	0	0.400999	0.389764	1.10261
MD16G1091300	1	0	-1.87702	-0.309911	-0.428832			MD15G1096600	1	0	0.0281071	0.515715	0.238501
MD09G1209000	1	0	-0.907477	-0.081885	-0.668954			MD17G1051600	1	0	-0.399726	0.994739	0.686824
MD08G1169200	1	0	-0.414127	0.473065	-0.440032			MD02G1141300	1	0	0.098304	0.861328	-0.288997
MD07G1157600	1	0	-1.33485	0.512363	0.103091			MD11G1169600	1	0	0.222914	0.141743	1.78683
MD13G1155300	1	0	-0.330638	-0.306208	-0.553964			MD15G1348800	1	0	-0.202887	0.728028	0.998788
MD04G1214700	1	0	-0.779793	0.374053	-1.46583			MD13G1239700	1	0	0.706987	0.68928	0.331608
MD17G1274000	1	0	-0.937001	0.392361	-0.90085			MD02G1291200	1	0	0.0896047	0.833599	0.789435
MD01G1144100	1	0	-0.652237	0.472529	-0.891421			MD05G1363600	1	0	0.333224	0.795202	1.15582
MD05G1205600	1	0	-0.0229967	0.282905	-0.513598			MD01G1225700	1	0	0.224714	1.53507	0.37812
MD17G1266300	1	0	-0.597462	-0.200333	-0.751165			MD10G1052200	1	0	0.499341	0.372918	-0.335412
MD11G1022800	1	0	-1.30791	0.161082	-0.709302			MD16G1000300	1	0	0.800242	0.696464	0.500335
MD05G1266000	1	0	-0.750712	-0.0489287	-0.721194			MD05G1006700	1	0	0.324221	0.596504	0.0725613
MD13G1015800	1	0	-1.35179	0.503844	-0.122424			MD04G1100000	1	0	0.915856	0.357276	1.77938
MD07G1311500	1	0	-1.07854	0.228793	-1.19356			MD13G1163600	1	0	0.138275	1.06083	0.252573
MD11G1269900	1	0	-0.543022	-0.131474	-0.340184			MD07G1056400	1	0	0.0445353	0.628954	0.319969
MD12G1080200	1	0	-1.52398	0.27543	-0.50769			MD02G1034600	1	0	0.0522966	0.662799	0.23072
MD07G1247000	1	0	-0.667894	-0.0635345	-0.761879			MD15G1063600	1	0	0.485677	0.670205	0.235219
MD11G1294000	1	0	-0.575247	0.543808	-0.367548			MD09G1240700	1	0	-0.0155169	0.699357	0.399405
MD12G1139800	1	0	-0.229903	-0.628633	-1.22196			MD16G1017600	1	0	0.946502	0.766885	-0.130731
MD14G1129200	1	0	-1.15862	-0.0369692	-0.169698			MD03G1130600	1	0	0.499861	0.164067	0.0755481
MD10G1033200	1	0	-1.62492	0.0520784	-0.20786			MD05G1254500	1	0	-0.255864	0.530536	-0.195067
MD15G1348000	1	0	-1.63352	0.574365	-0.413077			MD02G1118100	1	0	-0.0619066	0.486588	0.53589
MD05G1170600	1	0	-0.734803	0.157546	-0.528446			MD11G1215600	1	0	-0.0909747	0.406429	0.241961
MD00G1053700	1	0	-2.05645	-0.0998906	-0.127811			MD06G1003700	1	0	0.203261	1.32917	0.706857
MD13G1008300	1	0	-1.29053	0.0937014	-0.454202			MD10G1132600	1	0	0.300229	0.813757	1.09859
MD11G1114800	1	0	-0.800135	0.437358	-0.32145			MD05G1257600	1	0	0.399797	0.767091	0.364859
MD03G1102500	1	0	-0.599573	1.22487	-0.289268			MD16G1170100	1	0	0.311216	0.595353	0.676145
MD03G1161800	1	0	-1.2638	0.705655	-0.507617			MD10G1278000	1	0	0.304925	1.1922	0.391495
MD14G1244900	1	0	-0.717965	0.578886	-0.694104			MD02G1060200	1	0	0.965539	0.221056	0.207631
MD12G1141700	1	0	-0.70355	-0.0371736	-0.494428			MD16G1263200	1	0	-0.205536	0.570653	0.103166
MD08G1016000	1	0	-0.694054	0.206388	-0.733951			MD13G1090800	1	0	0.574631	0.650694	0.129675
MD17G1157700	1	0	-1.14444	0.441023	-0.910768			MD07G1097700	1	0	0.0909635	0.827627	-0.151683
MD07G1198000	1	0	-0.965441	0.133806	-0.309427			MD08G1061700	1	0	0.306828	0.937297	-0.208994
MD16G1087700	1	0	-1.28038	-0.269111	-0.481185			MD09G1184700	1	0	0.0590679	0.751181	-0.122516
MD10G1018200	1	0	-1.13347	0.445391	-0.56377			MD05G1113000	1	0	0.416985	0.599031	0.190576
MD07G1239000	1	0	-1.41619	0.448872	-0.796621			MD06G1112400	1	0	-0.176808	0.41771	0.0803639
MD12G1136800	1	0	-0.898423	0.071403	-0.315731			MD10G1190400	1	0	1.53524	1.26069	-0.207203
MD07G1156800	1	0	-0.951941	0.0924557	-0.478753			MD13G1172200	1	0	-0.0634261	1.09469	0.0320269
MD10G1252900	1	0	-0.928703	-0.264686	-0.793171			MD04G1236900	1	0	0.0452117	1.07794	0.225167
MD01G1194600	1	0	-1.05736	1.01527	-0.559474			MD05G1133300	1	0	0.923157	0.250239	1.19905
MD15G1129700	1	0	-1.56611	0.307431	-0.549648			MD01G1218800	1	0	0.843322	1.14795	0.396877
MD03G1110000	1	0	-1.74232	-0.777797	-0.377657			MD17G1071700	1	0	0.136888	0.772068	0.119791
MD14G1037100	1	0	-1.24529	0.597831	-0.668135			MD04G1184700	1	0	0.285019	0.656688	0.722614
MD01G1195100	1	0	-1.11255	0.150554	-0.32469			MD02G1250200	1	0	0.694015	0.81419	0.271797
MD15G1226100	1	0	-0.540235	0.245214	-0.755556			MD01G1143100	1	0	0.0974206	0.919864	0.0120862
MD12G1205300	1	0	-0.662959	0.23397	-0.552469			MD16G1090000	1	0	0.319498	1.41031	0.616608
MD02G1313100	1	0	-0.867627	0.580781	-0.327208			MD07G1147700	1	0	-0.426669	0.721246	-0.232426
MD11G1211800	1	0	-1.63251	-0.497734	-0.3571			MD13G1030300	1	0	0.22929	1.46403	-0.462124
MD07G1150000	1	0	-1.04888	0.439817	-0.311984			MD10G1306900	1	0	-0.144737	0.61879	0.327791
MD01G1195900	1	0	-1.15349	-0.32562	-0.330267			MD15G1129400	1	0	0.274729	0.473641	-0.155758
MD02G1299700	1	0	-1.3624	0.260318	0.372907			MD06G1189300	1	0	1.22784	1.07425	-0.861432
MD11G1008900	1	0	-1.43552	0.106967	-0.50181			MD10G1037200	1	0	-0.0433414	0.542621	0.0726586
MD12G1263000	1	0	-0.751812	0.258301	-0.795279			MD03G1017300	1	0	0.107021	0.62958	0.246461
MD13G1092000	1	0	-1.02517	0.56329	0.123243			MD03G1269900	1	0	-0.437764	0.458796	-0.399172
MD08G1145800	1	0	-0.391056	0.379438	-0.263971			MD11G1207500	1	0	-0.032758	0.54237	0.729679
MD08G1023400	1	0	-0.472928	-0.346563	-1.22662			MD02G1096100	1	0	0.601281	1.19795	0.619495
MD11G1028000	1	0	-0.469124	-0.0272935	-0.421804			MD09G1079500	1	0	0.821799	1.32096	0.544734
MD14G1165700	1	0	-1.0211	0.196535	-1.0112			MD09G1065700	1	0	0.587884	0.90072	-0.141907
MD01G1092400	1	0	-0.868351	1.1384	-0.988385			MD02G1307700	1	0	0.433707	0.699327	0.975953
MD06G1181600	1	0	-1.69355	-0.0831928	-0.651728			MD05G1351400	1	0	0.44508	0.455665	0.266113
MD02G1211500	1	0	-0.803725	0.269745	-0.144599			MD07G1106200	1	0	0.526311	0.656386	0.856828
MD03G1176600	1	0	-0.368441	0.337686	-0.48138			MD11G1178000	1	0	1.09271	0.253885	0.71642
MD14G1171200	1	0	-0.551453	0.0848299	-0.370789			MD04G1141900	1	0	0.524947	0.943714	0.312522
MD06G1135400	1	0	-1.05884	0.537171	-1.477			MD12G1041800	1	0	0.0064115	0.611716	0.2285
MD01G1198500	1	0	-1.24402	0.32912	-0.591059			MD16G1101000	1	0	0.160718	1.02468	-0.410751
MD11G1284300	1	0	-0.801092	-0.16808	-0.194774			MD16G1116500	1	0	0.461358	1.48562	0.651915
MD14G1121900	1	0	-0.963627	-0.309025	-0.41231			MD10G1068500	1	0	-0.155348	0.336546	0.590765
MD05G1149600	1	0	-0.937175	-0.0877186	-0.360194			MD10G1017800	1	0	0.587569	0.484192	1.47429
MD09G1005800	1	0	-1.06235	0.43743	-0.492527			MD02G1002600	1	0	0.780043	0.749775	0.28567
MD14G1222800	1	0	-0.357798	-0.13683	-0.736258			MD16G1041600	1	0	2.57711e-06	0.790681	0.022897
MD10G1159600	1	0	-1.55869	-0.0669826	-0.267934			MD12G1018800	1	0	0.425907	0.667859	0.0748122
MD03G1143300	1	0	-0.743585	-0.171192	-0.365542			MD05G1217700	1	0	0.236534	0.403931	0.11254
MD11G1265700	1	0	-1.41125	0.269018	-0.595966			MD14G1172300	1	0	0.411388	1.32846	0.616982
MD01G1124100	1	0	-1.42124	0.261324	-0.453388			MD15G1276700	1	0	0.76895	1.06983	0.580492
MD05G1344500	1	0	-1.27363	0.00259787	-0.165472			MD09G1018200	1	0	0.4029	0.946432	0.0170957
MD15G1345400	1	0	-1.83598	-0.183285	-0.213347			MD02G1249300	1	0	0.363104	0.632214	0.195137
MD13G1107400	1	0	-1.3914	0.587856	-0.505126			MD03G1207000	1	0	0.329485	0.375671	0.313577
MD01G1167900	1	0	-1.29914	0.192508	-0.491938			MD15G1050100	1	0	0.384273	0.738146	-0.25664
MD07G1163100	1	0	-0.652577	0.0169099	-0.707308			MD10G1213300	1	0	0.46339	1.1675	0.586245
MD08G1127900	1	0	-0.889109	0.347369	-0.515533			MD07G1308000	1	0	-0.0590658	1.54217	-0.0620749
MD04G1131500	1	0	-0.603199	0.184797	-0.738381			MD07G1223200	1	0	0.249525	0.903127	0.418214
MD04G1029200	1	0	-0.64365	0.144962	-0.972567			MD08G1245000	1	0	0.280126	0.919264	0.442055
MD11G1027400	1	0	-0.983867	-0.151292	-0.740668			MD16G1040600	1	0	0.599332	0.212661	0.324087
MD05G1334100	1	0	-0.824926	0.167892	-0.873434			MD14G1221000	1	0	0.125462	0.606112	0.301876
MD15G1064600	1	0	-1.19704	0.533416	-0.708082			MD12G1079300	1	0	0.182158	0.792232	0.0615444
MD14G1068600	1	0	-0.619467	-0.0678557	-0.462142			MD13G1093600	1	0	0.396706	1.5307	0.319937
MD06G1075800	1	0	-0.823704	0.112334	-0.852891			MD12G1008300	1	0	0.717009	0.582533	0.46013
MD05G1108800	1	0	-0.333796	-1.33481	-1.56973			MD09G1056600	1	0	0.0266216	0.983194	0.4274
MD04G1119500	1	0	-0.686838	0.196442	-0.460365			MD09G1270100	1	0	0.454206	1.05418	0.448393
MD06G1077900	1	0	-0.997497	0.0753004	-0.307914			MD10G1290000	1	0	0.0576654	0.674179	0.709021
MD01G1191400	1	0	-1.38972	0.44562	-0.577361			MD10G1273700	1	0	-0.30591	0.370017	0.363331
MD13G1166700	1	0	-1.0991	-0.237925	-0.373373			MD09G1056400	1	0	0.449004	0.299204	0.787121
MD09G1146800	1	0	-1.15717	0.235227	-1.386			MD01G1211300	1	0	0.632613	1.19925	0.166732
MD15G1405000	1	0	-0.893143	0.605889	-0.563422			MD09G1193000	1	0	0.103239	0.447519	-0.261209
MD11G1206000	1	0	-1.0011	0.00407269	-0.651426			MD16G1096600	1	0	0.3619	0.676156	0.810126
MD14G1113700	1	0	-1.40525	0.0645542	-0.244779			MD07G1230200	1	0	1.08693	0.24172	-0.129
MD15G1040000	1	0	-2.24236	-0.393268	-0.301952			MD14G1204000	1	0	-0.303187	0.398446	0.105728
MD00G1083000	1	0	-0.75715	0.152935	-0.186169			MD15G1025600	1	0	0.398512	1.46285	0.152682
MD16G1043700	1	0	-0.700939	0.28337	-0.786588			MD02G1316300	1	0	-0.057227	0.511478	0.146121
MD12G1039500	1	0	-0.711084	-0.17904	-0.0849332			MD10G1003000	1	0	0.448616	0.788376	0.427668
MD02G1137500	1	0	-1.16335	0.406781	-0.789407			MD07G1021600	1	0	0.0444557	0.515683	0.00338147
MD02G1165800	1	0	-2.01038	-0.362117	-0.153255			MD08G1203600	1	0	0.296329	0.745589	0.01359
MD15G1063500	1	0	-1.72542	-0.0520325	0.0944156			MD11G1076000	1	0	0.43894	0.887443	0.198248
MD13G1114900	1	0	-0.784041	-0.0670145	-0.583387			MD17G1129400	1	0	0.524574	0.898732	0.439844
MD02G1164300	1	0	-1.31879	0.121558	-0.282446			MD13G1155200	1	0	-0.256642	1.13328	0.487646
MD14G1075900	1	0	-0.855508	-0.0165832	-0.39085			MD02G1017500	1	0	0.451556	0.474509	-0.257113
MD13G1239300	1	0	-0.6881	-0.246779	-1.43584			MD09G1232900	1	0	-0.306918	0.508134	0.0388444
MD08G1079800	1	0	-1.02279	0.481436	-1.19429			MD03G1167500	1	0	0.660039	0.350159	-0.215534
MD05G1088500	1	0	-1.72537	0.0875171	-0.451606			MD10G1275100	1	0	0.726789	1.08421	0.924316
MD08G1191700	1	0	-1.77219	0.36158	0.0371461			MD08G1082000	1	0	-0.405482	0.835931	0.431261
MD17G1025500	1	0	-1.02186	0.308899	-0.607534			MD06G1213500	1	0	0.168169	0.410841	0.135446
MD03G1003100	1	0	-1.07867	0.233269	-0.478045			MD01G1163900	1	0	0.39566	1.20866	-0.212787
MD10G1277000	1	0	-0.989546	0.021554	-0.580934			MD17G1246800	1	0	1.1886	1.12952	0.490498
MD07G1111500	1	0	-1.25178	0.105343	-0.655195			MD15G1084200	1	0	0.692351	1.14207	0.377164
MD03G1065000	1	0	-0.647423	0.349438	-0.424654			MD17G1080400	1	0	0.0948254	0.663404	0.390764
MD03G1111400	1	0	-0.200688	0.191608	-0.625403			MD08G1185700	1	0	0.168994	0.537722	0.11965
MD16G1102900	1	0	-0.988714	0.357641	-0.885969			MD13G1007200	1	0	0.634897	0.599641	0.271165
MD15G1338600	1	0	-0.851448	0.117753	-0.371738			MD07G1216600	1	0	0.13923	0.536956	0.265164
MD02G1181900	1	0	-0.979489	-0.273308	-0.732567			MD04G1068400	1	0	0.495788	0.458281	0.311135
MD00G1035000	1	0	-1.25999	0.288773	-0.289095			MD08G1218200	1	0	0.346564	1.04262	0.668497
MD02G1247300	1	0	-1.37731	0.199443	0.0691606			MD12G1103300	1	0	0.304756	1.00027	0.380806
MD10G1036300	1	0	-1.82874	-0.219951	-0.297655			MD09G1163600	1	0	-0.186007	0.571298	0.00426846
MD13G1175800	1	0	-1.29888	-0.259412	-0.400281			MD00G1148200	1	0	0.195794	0.538233	0.447429
MD12G1111200	1	0	-0.589991	0.0345398	-0.603533			MD07G1247400	1	0	0.21854	0.493184	0.126748
MD15G1023900	1	0	-0.877086	0.256755	-1.31655			MD09G1018600	1	0	-0.43517	0.846344	0.315572
MD13G1198600	1	0	-1.51117	0.128092	-0.44183			MD02G1025600	1	0	0.732042	0.596502	0.294452
MD09G1253500	1	0	-1.33738	0.341348	-0.604706			MD06G1077500	1	0	1.05284	1.39814	-0.119226
MD16G1132200	1	0	-0.962741	0.0732763	-1.76612			MD15G1150600	1	0	0.613997	1.1609	0.668488
MD15G1013200	1	0	-0.538905	-0.253043	-1.23693			MD13G1137200	1	0	0.435619	1.26047	0.579824
MD05G1302500	1	0	-0.561624	0.140975	-0.677811			MD17G1144300	1	0	-0.0161578	0.448687	0.385419
MD01G1206800	1	0	-1.42784	0.0181819	-0.0505373			MD00G1007800	1	0	0.434509	0.156145	0.451668
MD06G1052700	1	0	-0.621322	0.584477	-0.744368			MD02G1026100	1	0	0.353004	0.58721	0.171152
MD10G1336900	1	0	-1.55751	-0.197181	-0.0852673			MD07G1001300	1	0	-0.119137	0.64643	0.962914
MD01G1198000	1	0	-1.34576	0.201454	-0.272278			MD07G1032500	1	0	0.270249	0.888529	0.68359
MD16G1049000	1	0	-0.807576	0.009499	-0.751125			MD15G1366800	1	0	0.0400504	0.490167	0.113391
MD17G1170300	1	0	-0.870423	0.164929	-0.674687			MD07G1261100	1	0	0.363632	0.539978	0.0547709
MD06G1090600	1	0	-0.537043	0.906734	-1.12472			MD05G1290300	1	0	0.571064	0.256645	0.478339
MD02G1184600	1	0	-0.233529	-0.156857	-0.406792			MD01G1218000	1	0	0.401404	1.18561	0.592592
MD15G1030400	1	0	-0.450335	0.415303	-0.407853			MD15G1414100	1	0	0.723698	0.403111	0.840376
MD12G1072700	1	0	-0.750447	0.0105434	-0.296588			MD14G1183900	1	0	0.0103482	0.664781	0.209882
MD13G1081700	1	0	-1.54603	-0.00147336	-0.480272			MD06G1184500	1	0	0.0959215	0.758452	-0.0525937
MD09G1205600	1	0	-0.0258846	0.135697	-0.468513			MD11G1156000	1	0	-0.306844	0.410382	0.17318
MD14G1170600	1	0	-0.773018	-0.0849072	-0.58908			MD17G1265700	1	0	0.495152	0.695977	0.905028
MD02G1223300	1	0	-0.683008	0.151403	-0.79153			MD14G1114600	1	0	0.44149	0.594229	0.639887
MD00G1020200	1	0	-1.40789	-0.135155	0.679598			MD16G1006700	1	0	-0.0372195	0.628645	0.112454
MD05G1340800	1	0	-0.736813	0.217075	-0.429799			MD11G1246600	1	0	0.774677	0.462068	0.260137
MD09G1165200	1	0	-0.647271	0.0668332	-0.250926			MD03G1082200	1	0	-0.746695	0.542387	0.0799227
MD00G1182300	1	0	-0.52299	0.579687	-0.793985			MD04G1165700	1	0	-0.163624	0.723823	0.295897
MD00G1156200	1	0	-1.01229	-0.079403	-0.633467			MD05G1137900	1	0	0.495468	0.857151	0.386743
MD15G1257500	1	0	-0.7676	-0.110631	-1.30613			MD02G1106700	1	0	0.404355	0.310106	0.161443
MD17G1191000	1	0	-1.11522	0.683184	-1.31328			MD01G1172800	1	0	0.324447	0.935043	-0.0319564
MD14G1099800	1	0	-0.870268	-0.0903648	-0.509722			MD14G1196300	1	0	0.910704	0.865427	-0.238868
MD16G1186300	1	0	-0.657431	0.227596	-0.56128			MD15G1394000	1	0	-0.138209	0.530705	0.343432
MD14G1162400	1	0	-1.31358	0.0857746	-0.698328			MD04G1213800	1	0	-0.417755	1.02476	-0.0685662
MD02G1245600	1	0	-0.820911	0.529686	-0.294316			MD00G1021300	1	0	0.193311	0.844887	0.536719
MD05G1305200	1	0	-0.95193	0.730244	-0.367398			MD08G1229800	1	0	0.180953	1.00651	0.812351
MD15G1263000	1	0	-0.606267	-0.132584	-1.50378			MD17G1045600	1	0	0.730002	0.141289	0.3608
MD15G1315500	1	0	-0.788131	0.466728	-0.886534			MD08G1011100	1	0	0.343408	0.233086	1.71543
MD13G1196500	1	0	-1.03314	0.373962	-0.761433			MD09G1098900	1	0	0.482077	0.669963	0.837754
MD06G1098900	1	0	-0.860388	-0.257108	-0.595167			MD10G1224200	1	0	0.82285	0.0571882	-0.0584787
MD05G1132500	1	0	-0.895514	0.540998	-0.437724			MD12G1191100	1	0	0.205294	0.365091	0.020433
MD16G1053600	1	0	-0.493423	-0.265223	-1.18685			MD05G1335200	1	0	0.539982	0.35653	0.273669
MD01G1066200	1	0	-0.231469	-0.196638	-0.776556			MD17G1179300	1	0	0.64912	0.171848	0.0598423
MD14G1085100	1	0	-0.575361	-0.015658	-0.524975			MD05G1021300	1	0	0.0593789	0.799028	0.349263
MD14G1009700	1	0	-0.64406	0.419197	-0.605216			MD12G1228800	1	0	0.357348	1.3534	0.635327
MD02G1149400	1	0	-1.30952	0.224408	-0.683819			MD09G1116700	1	0	0.207996	0.318156	0.0277892
MD05G1037300	1	0	-0.657062	0.74293	-0.761921			MD08G1177400	1	0	0.0186903	0.6433	0.0297059
MD09G1110300	1	0	-1.27873	0.770506	-0.922163			MD05G1307600	1	0	0.163374	0.817893	0.106
MD05G1191500	1	0	-0.751006	0.238409	-0.63355			MD05G1323500	1	0	0.911076	0.811038	0.570113
MD17G1219700	1	0	-1.7084	0.275396	0.143887			MD00G1026000	1	0	0.485522	0.781231	0.326039
MD13G1141400	1	0	-1.55238	0.392043	-0.564358			MD02G1245000	1	0	0.555711	0.849505	0.973251
MD11G1134800	1	0	-1.16757	0.615091	-0.7039			MD15G1042700	1	0	0.26111	0.757873	0.260208
MD06G1218600	1	0	-1.28174	-0.217869	0.856706			MD05G1298800	1	0	0.406013	1.20659	0.639994
MD15G1061700	1	0	-1.73159	0.860426	0.0647896			MD01G1117800	1	0	0.585659	0.489026	1.56294
MD11G1307600	1	0	-0.587012	-0.194068	-0.229652			MD10G1064300	1	0	0.355324	0.460361	0.833244
MD09G1164800	1	0	0.135561	0.0990401	-0.769568			MD02G1023000	1	0	-0.0908417	0.585289	-0.00221145
MD10G1074900	1	0	-0.615172	-0.114341	-0.619556			MD17G1056800	1	0	0.449386	-0.2302	0.856599
MD12G1179100	1	0	-0.756556	0.261191	-0.661844			MD02G1130400	1	0	0.497363	1.04896	0.207724
MD02G1093600	1	0	-0.778181	0.33303	-1.0875			MD09G1026200	1	0	0.840306	0.917187	0.352756
MD12G1164600	1	0	-1.30367	0.207882	-0.560842			MD07G1150500	1	0	0.428273	0.863055	0.528877
MD05G1071900	1	0	-1.0951	-0.0374228	-0.363323			MD09G1024100	1	0	0.300565	0.550365	0.0455636
MD10G1101500	1	0	-1.28237	0.235994	-0.753559			MD11G1059500	1	0	0.0287206	0.667126	0.357709
MD13G1036200	1	0	-0.736636	0.870983	-0.46436			MD14G1015900	1	0	0.56599	0.465688	-0.0602947
MD07G1030400	1	0	-0.92122	0.321241	-0.844946			MD13G1062200	1	0	0.0277084	0.541616	0.182747
MD02G1021100	1	0	-1.07349	0.641704	-0.695248			MD02G1185000	1	0	0.907631	0.722993	0.612637
MD04G1069900	1	0	-0.228615	0.327507	-0.549177			MD02G1003000	1	0	0.312346	-0.0371509	0.913494
MD09G1270700	1	0	-0.781813	-0.283147	-0.546275			MD11G1188100	1	0	0.220759	0.462269	0.123585
MD11G1094300	1	0	-1.41523	-0.101527	-0.0524186			MD04G1035300	1	0	0.0869955	1.18159	0.486193
MD02G1250400	1	0	-2.10081	0.0611423	-0.619136			MD11G1228300	1	0	0.363721	1.1913	0.488326
MD00G1214200	1	0	0.130893	0.209394	-1.20133			MD14G1056200	1	0	0.0917405	0.818552	0.442416
MD16G1258900	1	0	-0.8919	0.477099	-0.696157			MD11G1066000	1	0	0.385577	0.406253	0.68084
MD00G1024500	1	0	-1.22479	0.122172	-0.0775607			MD10G1217500	1	0	0.315037	1.07077	0.28581
MD02G1247700	1	0	-0.632923	-0.208735	-0.76883			MD05G1337800	1	0	-0.335798	0.597121	0.424344
MD02G1119800	1	0	-0.349393	-0.181225	-0.499444			MD15G1136400	1	0	0.718636	0.176702	-0.119806
MD07G1010700	1	0	-0.648947	-0.202802	-0.658286			MD12G1223100	1	0	0.293793	0.435731	-0.206428
MD05G1079700	1	0	-0.508941	0.0431776	-0.393518			MD05G1261500	1	0	0.546684	0.387918	0.123225
MD16G1076000	1	0	-0.275444	-0.839214	-1.94554			MD02G1047000	1	0	0.589163	0.196299	0.063161
MD02G1149500	1	0	-0.889339	-0.0113569	-0.818832			MD03G1062400	1	0	0.522264	0.28455	0.275875
MD13G1203200	1	0	-1.72769	-0.0360368	-0.52101			MD11G1273500	1	0	0.256536	1.12843	0.387062
MD13G1033300	1	0	-0.705886	-0.108722	-0.82067			MD07G1183100	1	0	-0.129359	0.455087	0.0664038
MD13G1214900	1	0	-1.17332	-0.159773	-0.441112			MD07G1143900	1	0	0.196763	1.00647	0.204733
MD17G1012100	1	0	-0.753907	-0.214509	-0.615078			MD10G1288100	1	0	0.580766	0.572244	0.27253
MD13G1014000	1	0	-0.902273	0.00500211	-0.619031			MD07G1231600	1	0	0.352407	0.617095	0.517961
MD02G1198100	1	0	-0.888529	0.036085	-0.462194			MD15G1067000	1	0	-0.0345314	1.64658	0.722693
MD12G1039400	1	0	-0.867185	-0.0635665	-0.383085			MD01G1032200	1	0	0.378678	1.11277	0.622461
MD14G1040300	1	0	-1.45164	0.737638	-0.392053			MD05G1121500	1	0	0.400172	0.437636	0.487912
MD13G1192500	1	0	0.421609	0.232758	-0.910649			MD15G1196700	1	0	0.215179	0.709162	0.0393737
MD17G1044700	1	0	-0.734903	0.533602	-0.631547			MD15G1213900	1	0	0.370112	0.324105	0.0281082
MD03G1119600	1	0	-0.160975	0.758663	-0.55283			MD07G1070700	1	0	0.131306	0.907505	0.338855
MD04G1131600	1	0	-0.964667	0.130183	-0.554682			MD11G1247400	1	0	-0.168259	0.826604	0.304313
MD05G1149500	1	0	-1.07916	-0.0374102	-0.386193			MD13G1125000	1	0	-0.44783	0.992197	0.507752
MD09G1274400	1	0	-1.44163	-0.296718	0.0684289			MD08G1232800	1	0	0.463333	0.403953	1.04268
MD10G1252300	1	0	-0.75489	0.672028	-0.49078			MD04G1217700	1	0	0.441163	0.775846	0.382307
MD13G1101800	1	0	-0.986131	0.0599926	-0.31974			MD09G1037400	1	0	0.591362	0.593428	0.27975
MD04G1035000	1	0	-1.57951	-0.368654	0.406468			MD07G1168000	1	0	0.0168494	1.87878	0.00253595
MD10G1114900	1	0	-0.507344	-0.116228	-0.392712			MD09G1140500	1	0	0.0903841	0.851508	0.247186
MD12G1182400	1	0	-0.903078	-0.109064	-0.451623			MD07G1263200	1	0	0.856493	1.07143	0.546768
MD08G1011400	1	0	-0.753663	-0.15138	-0.442839			MD02G1273000	1	0	0.144181	0.737406	0.174789
MD17G1154500	1	0	0.294599	-0.0759952	-1.17614			MD17G1153400	1	0	0.236083	1.13787	0.556991
MD02G1145800	1	0	-0.95472	0.10645	-0.782189			MD01G1129400	1	0	0.165106	0.52303	0.0165003
MD09G1108600	1	0	-0.975288	0.620633	-0.524994			MD10G1303300	1	0	0.262194	0.511022	0.368118
MD07G1162800	1	0	-0.563525	0.397995	-0.401042			MD06G1185900	1	0	0.710218	0.913253	0.652293
MD02G1100900	1	0	-2.07792	0.0517991	-0.72076			MD10G1097100	1	0	0.272252	1.00619	0.00695425
MD16G1257600	1	0	-1.55352	0.379763	0.251682			MD03G1084700	1	0	-0.26211	0.387651	0.112176
MD08G1098900	1	0	-0.0362273	0.111149	-0.805766			MD17G1140000	1	0	0.943319	0.41371	0.789219
MD03G1148100	1	0	-1.69763	0.111958	0.0493758			MD11G1239800	1	0	0.644973	0.303348	0.748832
MD03G1053500	1	0	-0.573425	-0.167284	-0.956297			MD10G1254000	1	0	0.491751	0.493997	-0.217925
MD02G1013300	1	0	-0.661693	0.189995	-0.482387			MD05G1222300	1	0	0.305517	0.399576	-0.0413355
MD03G1006300	1	0	-0.663236	1.10827	-0.698768			MD08G1078800	1	0	-0.00226196	0.596996	0.332629
MD12G1059000	1	0	-1.15175	0.0851214	-0.661333			MD07G1261200	1	0	0.256955	0.453689	0.0407968
MD10G1098900	1	0	-1.47149	0.398122	0.254778			MD13G1241000	1	0	0.225253	0.522028	-8.26933e-05
MD12G1244500	1	0	-1.31182	0.401397	-0.476021			MD06G1039100	1	0	0.577904	1.1053	0.595975
MD06G1206200	1	0	-0.489354	0.194441	-1.20183			MD15G1357000	1	0	0.455187	0.453009	0.358274
MD06G1147900	1	0	-1.83793	0.0600181	0.895783			MD02G1095000	1	0	0.470253	0.474136	0.507302
MD15G1407800	1	0	-0.484076	-0.177859	-1.86302			MD10G1134700	1	0	0.30506	0.854278	0.428951
MD10G1028700	1	0	-0.545257	-0.10142	-1.2633			MD17G1129500	1	0	0.729261	0.313075	0.947817
MD05G1141500	1	0	-1.58282	0.388028	-0.0486828			MD13G1225400	1	0	0.36769	0.588244	0.0911834
MD17G1017900	1	0	-0.70429	0.327674	-0.513364			MD17G1259200	1	0	0.467822	0.598821	0.723707
MD00G1178900	1	0	-0.77082	-0.0289822	-0.335331			MD02G1114500	1	0	0.563839	1.41059	0.622006
MD10G1264100	1	0	-0.438888	0.317782	-0.410616			MD16G1143100	1	0	0.580901	1.15435	0.554764
MD14G1063100	1	0	-0.695609	-0.340328	-0.347269			MD07G1178900	1	0	-0.198292	0.587736	0.480925
MD16G1127800	1	0	-1.23121	0.0986174	0.163046			MD08G1094900	1	0	0.597905	0.140183	0.70327
MD04G1007100	1	0	-1.09057	0.0296783	-0.386012			MD15G1276900	1	0	0.787472	1.00204	0.0193673
MD05G1265900	1	0	-1.83048	0.100426	-0.449272			MD12G1204300	1	0	-0.409623	0.441141	0.0739929
MD06G1103400	1	0	-0.754502	1.31968	-0.240441			MD11G1301600	1	0	-0.0451351	0.852313	0.145636
MD13G1158100	1	0	-0.857038	-0.244246	-0.663059			MD00G1158400	1	0	0.390129	0.768172	0.973849
MD03G1083300	1	0	-2.08835	0.162998	-0.425283			MD02G1093200	1	0	0.407727	1.01659	0.423118
MD15G1391900	1	0	-0.901789	-0.563076	-1.47307			MD15G1416500	1	0	0.677262	1.23858	0.613013
MD16G1012200	1	0	-0.60672	-0.0334833	-0.570461			MD16G1019900	1	0	0.0935163	0.71072	0.329789
MD11G1176500	1	0	-0.755581	-0.0083254	-0.586025			MD11G1199600	1	0	0.361318	0.779526	0.283641
MD07G1187800	1	0	-0.240749	0.709875	-0.771881			MD13G1214500	1	0	0.00240752	0.591165	0.0817638
MD17G1006800	1	0	-0.906436	0.225995	-0.60172			MD05G1297500	1	0	0.482348	1.1463	0.559269
MD16G1231900	1	0	-1.70146	0.0319118	-0.666326			MD05G1033400	1	0	0.931328	0.879285	0.0537181
MD11G1148900	1	0	-1.61997	-0.0812539	-0.27332			MD02G1140200	1	0	0.00417472	0.903298	0.982357
MD06G1160000	1	0	-0.609339	0.393815	-0.568123			MD00G1105000	1	0	0.369802	1.29525	0.504428
MD13G1042100	1	0	-1.32937	-0.522832	-0.386285			MD02G1250800	1	0	0.250938	0.415532	-0.317372
MD01G1142000	1	0	-1.09382	0.467801	-0.395023			MD15G1413300	1	0	0.190421	0.648699	0.440174
MD15G1164600	1	0	-1.70415	0.0445844	-0.197914			MD10G1267800	1	0	0.389922	0.982309	-0.132485
MD03G1294100	1	0	-1.41044	0.375631	-0.549211			MD17G1143700	1	0	0.0436701	0.660341	0.249516
MD14G1084700	1	0	-1.15764	0.18102	-0.450147			MD15G1425900	1	0	1.05878	0.931012	0.614548
MD10G1268500	1	0	-0.0381118	-2.36904	-1.76968			MD02G1139900	1	0	-0.49896	0.750137	1.01595
MD11G1256100	1	0	-1.13907	0.500165	0.0282172			MD02G1030600	1	0	0.164764	1.15865	0.353838
MD00G1039000	1	0	-1.52776	0.477556	0.228404			MD08G1242500	1	0	-0.0950862	0.316176	0.125405
MD02G1252900	1	0	-0.631083	0.00194749	-0.578224			MD15G1274800	1	0	0.174692	0.442804	0.117027
MD15G1376800	1	0	-1.16085	-0.103933	-0.464068			MD02G1294300	1	0	0.351395	0.644841	0.00957239
MD07G1236600	1	0	-1.15727	-0.0616708	-0.617047			MD13G1000200	1	0	0.517981	0.336847	0.0583078
MD15G1443500	1	0	-0.709681	0.349582	-0.483043			MD03G1148500	1	0	0.970691	0.806186	0.384125
MD10G1279900	1	0	-0.324793	0.228027	-0.905183			MD10G1335500	1	0	-0.0133483	0.60344	0.620573
MD05G1172700	1	0	-0.765237	-0.367752	-0.510988			MD15G1205100	1	0	0.409515	0.148808	0.382943
MD02G1020000	1	0	-1.28599	0.641938	-0.523885			MD16G1196500	1	0	-0.0884821	0.888101	0.415
MD06G1157600	1	0	-1.30676	0.12529	-0.725874			MD07G1258700	1	0	0.0597622	0.684585	0.557551
MD05G1201700	1	0	-1.11699	-0.11061	-0.368519			MD14G1141400	1	0	0.898717	0.334116	0.647776
MD03G1136300	1	0	-1.22575	0.844777	-0.288052			MD14G1094200	1	0	0.6959	1.00315	0.271783
MD07G1284200	1	0	-1.23833	0.691874	-0.0721778			MD05G1019200	1	0	0.364074	1.16337	0.52242
MD14G1221100	1	0	-0.0718472	0.280003	-0.542836			MD11G1076200	1	0	0.338212	1.01512	-0.324534
MD09G1062600	1	0	-1.66221	0.40779	-0.279197			MD08G1103600	1	0	-0.0345516	0.536455	0.264085
MD01G1157100	1	0	-1.51462	0.0174806	0.0278469			MD13G1068700	1	0	0.442481	1.02868	0.261982
MD13G1251500	1	0	-1.17186	0.166701	-0.863013			MD09G1247300	1	0	0.0666761	0.858988	0.365365
MD13G1260900	1	0	-0.171247	0.360618	-0.486269			MD08G1208900	1	0	0.36724	0.414845	0.330274
MD01G1142300	1	0	-1.35257	-0.0481994	-0.224034			MD13G1077300	1	0	0.388646	0.856431	0.322034
MD17G1235000	1	0	-1.21015	0.432945	-0.648254			MD01G1236500	1	0	0.947619	0.751576	0.84189
MD13G1198800	1	0	-0.656546	0.0564136	-1.23506			MD15G1140000	1	0	0.740874	1.02832	0.874234
MD05G1029500	1	0	-0.967276	-0.147334	-0.388872			MD10G1004000	1	0	0.169682	0.474756	0.116906
MD13G1095000	1	0	-1.09785	0.343643	-0.921046			MD13G1273200	1	0	0.44202	0.489178	0.766648
MD10G1243000	1	0	-0.184371	0.104662	-1.56819			MD17G1031100	1	0	0.0123855	0.588108	0.805848
MD05G1304000	1	0	-1.02686	0.223398	-0.706279			MD10G1022200	1	0	-0.444177	1.28569	0.464852
MD07G1301800	1	0	-1.93028	0.0164027	-0.672411			MD11G1059300	1	0	0.339265	0.390235	0.666363
MD08G1043600	1	0	-0.828381	0.169692	-0.777912			MD14G1149600	1	0	0.598866	1.07864	0.466131
MD12G1128800	1	0	-0.707708	0.498237	-1.25893			MD00G1021600	1	0	0.555049	0.737697	0.386043
MD15G1145400	1	0	-0.68281	-0.173321	-0.406179			MD10G1325700	1	0	0.595384	0.871026	0.247654
MD15G1444500	1	0	-1.75983	0.532961	0.160844			MD13G1108800	1	0	0.241766	0.832265	0.947551
MD11G1160800	1	0	-0.886417	0.338385	-0.280482			MD07G1244600	1	0	0.0505405	0.650435	0.32824
MD16G1014100	1	0	-1.60814	0.148095	0.72272			MD07G1019200	1	0	-0.0194782	0.724135	0.125034
MD11G1304700	1	0	-1.42392	-0.204624	0.819328			MD05G1069100	1	0	0.299128	1.22511	0.656209
MD11G1304200	1	0	-0.59523	0.509891	-0.474827			MD09G1054200	1	0	0.272614	1.12595	0.296884
MD04G1231900	1	0	-0.818543	-0.113031	-0.578572			MD07G1173500	1	0	0.202983	0.466176	1.07851
MD06G1057200	1	0	-0.0154307	0.219582	-0.923537			MD13G1096200	1	0	0.325473	0.277079	0.0861646
MD16G1228500	1	0	-0.96027	0.365354	-0.658626			MD16G1263500	1	0	0.53669	1.25641	-0.161429
MD08G1137500	1	0	-0.858344	0.303327	-0.591756			MD11G1146800	1	0	0.0258417	0.20241	1.10796
MD15G1392100	1	0	-0.647413	0.202326	-1.17886			MD07G1215600	1	0	0.421805	1.07047	0.680905
MD08G1161000	1	0	-0.900343	0.0108336	-0.641484			MD15G1296400	1	0	0.929537	-0.210373	0.344802
MD07G1053500	1	0	-1.08427	0.175066	-0.235309			MD12G1254700	1	0	1.14394	0.780914	-0.498415
MD13G1073700	1	0	-1.08887	0.148995	-0.665668			MD01G1201900	1	0	-0.746815	0.467187	-0.10562
MD15G1419800	1	0	-0.304547	-0.336877	-1.18011			MD04G1011500	1	0	0.531172	0.267894	0.220363
MD07G1297900	1	0	-0.923554	0.0014758	-0.698112			MD13G1003100	1	0	0.546928	0.409674	0.585811
MD09G1071300	1	0	-0.705605	-0.00317778	-0.465781			MD06G1004100	1	0	0.209593	1.42187	-0.33849
MD10G1140900	1	0	-1.05871	0.156051	-0.594924			MD15G1353600	1	0	0.0726675	0.457831	0.0292539
MD05G1192200	1	0	-0.553552	0.26613	-0.5664			MD14G1004100	1	0	0.0824907	0.52604	0.0208314
MD00G1072100	1	0	-0.53185	0.12262	-0.691059			MD05G1121900	1	0	0.0680704	0.877359	0.40358
MD04G1040500	1	0	-0.598448	0.236674	-0.481521			MD08G1040800	1	0	0.346021	1.54102	0.655288
MD06G1088800	1	0	0.281221	0.302316	-0.926464			MD15G1426200	1	0	0.825619	0.997706	0.779587
MD16G1048700	1	0	-0.429849	0.401752	-0.162997			MD03G1249400	1	0	0.189474	0.526108	0.136904
MD03G1011100	1	0	-1.24838	0.198242	-0.767353			MD15G1092200	1	0	0.270725	1.1025	0.478475
MD10G1274700	1	0	-0.679354	0.336967	-0.810323			MD08G1197800	1	0	0.316484	0.390102	0.0959487
MD01G1063700	1	0	-1.80588	0.396396	-0.192568			MD02G1249700	1	0	0.15421	1.09124	0.368268
MD04G1166400	1	0	-1.3038	-0.0857429	0.159947			MD11G1019000	1	0	0.162161	1.06512	0.789573
MD06G1206100	1	0	-0.548671	-0.0940703	-0.837901			MD09G1135900	1	0	-0.113399	1.49132	-0.220843
MD11G1241400	1	0	-0.381571	0.156797	-0.820596			MD11G1189000	1	0	-0.428067	1.43884	0.488571
MD14G1014300	1	0	-0.875585	0.374426	-1.49288			MD14G1188800	1	0	-0.0609442	0.641114	0.246981
MD12G1103600	1	0	-1.15184	0.00593363	-0.451167			MD09G1175900	1	0	0.211425	0.442016	-0.104458
MD17G1054500	1	0	-0.855371	0.108848	-0.53214			MD16G1158300	1	0	-0.598458	1.92439	0.587709
MD10G1278400	1	0	-0.586957	0.29304	-0.444108			MD00G1220800	1	0	0.68718	0.442416	0.39042
MD01G1059700	1	0	-1.20765	-0.141566	-0.406854			MD00G1053600	1	0	-0.0279897	0.466761	0.858099
MD02G1253800	1	0	-0.885391	0.221714	-0.529168			MD15G1223800	1	0	0.420716	1.19592	0.650181
MD03G1109500	1	0	-0.402166	-0.180768	-0.344989			MD08G1131000	1	0	0.541296	1.07707	0.390581
MD17G1167100	1	0	-1.75802	0.56315	-0.00380403			MD05G1115800	1	0	0.249435	0.631995	0.459197
MD05G1038600	1	0	-1.5535	-0.414718	-0.330821			MD02G1276600	1	0	0.913307	0.492648	0.189725
MD00G1220400	1	0	-0.0743984	-0.176605	-0.932734			MD06G1044700	1	0	0.134711	0.445539	0.0376755
MD02G1118000	1	0	-1.07108	-0.222053	-0.464777			MD13G1041200	1	0	0.67136	0.321851	-0.0511303
MD09G1145200	1	0	-0.720042	0.269602	-0.835346			MD04G1236600	1	0	0.2656	0.828344	0.234017
MD17G1141200	1	0	-1.05766	0.299407	-1.2202			MD07G1305700	1	0	-0.0446891	0.510312	0.223049
MD16G1010600	1	0	-1.64623	-0.0927762	-0.554769			MD17G1062300	1	0	0.275529	1.0049	0.722006
MD14G1175000	1	0	-0.608554	0.0551005	-0.2764			MD14G1200400	1	0	0.0166525	0.530352	0.09109
MD05G1049600	1	0	-1.0032	0.288695	-0.044355			MD17G1171300	1	0	0.572219	0.838573	0.335438
MD15G1088000	1	0	-1.11775	0.459851	-0.799588			MD13G1141100	1	0	0.445889	0.442336	1.21087
MD11G1241900	1	0	0.222998	-0.462277	-1.99108			MD06G1165000	1	0	-0.258446	0.459392	0.0800877
MD16G1168800	1	0	-0.716496	0.135671	-0.281689			MD10G1264700	1	0	0.491367	0.142898	0.0525709
MD13G1111700	1	0	-0.857193	-0.181203	-0.511976			MD17G1088900	1	0	0.953422	1.2208	0.958264
MD07G1109800	1	0	-0.78719	0.112786	-0.544511			MD03G1221300	1	0	0.919078	1.20523	0.959778
MD16G1182000	1	0	-1.33954	0.184376	-0.383965			MD01G1085900	1	0	0.675484	1.12936	0.825104
MD06G1188400	1	0	-1.68401	0.116943	0.051216			MD04G1216100	1	0	-0.404745	0.717558	0.877629
MD10G1283200	1	0	-1.46337	0.467716	-0.675807			MD13G1150700	1	0	0.536915	0.779276	0.415474
MD16G1018000	1	0	-0.67319	0.401892	-0.874862			MD15G1395200	1	0	-0.00939917	0.432793	0.0727187
MD10G1143400	1	0	-1.03601	0.591809	-0.15258			MD02G1070300	1	0	0.168373	0.678294	0.450539
MD15G1131400	1	0	-1.40559	-0.371451	-0.444768			MD15G1144900	1	0	0.593981	0.237634	0.152908
MD09G1243600	1	0	-0.828406	1.01023	-0.756004			MD02G1247400	1	0	0.264963	0.521153	0.22378
MD05G1015500	1	0	-2.06184	-0.0257845	-0.270259			MD17G1134400	1	0	0.548764	0.779418	0.666748
MD02G1209900	1	0	-0.7381	0.0923837	-0.743807			MD03G1107900	1	0	0.484327	1.53497	0.691328
MD11G1118200	1	0	-0.800521	0.300203	-1.07278			MD15G1264800	1	0	0.102797	0.447139	-0.273206
MD07G1270200	1	0	-2.0338	-0.114473	-0.295903			MD02G1140100	1	0	0.623093	0.961356	0.1652
MD04G1003000	1	0	-0.823246	1.05189	-1.05894			MD17G1038400	1	0	0.409142	0.0567068	0.575961
MD09G1183300	1	0	-1.20065	0.459823	-0.589446			MD12G1197900	1	0	-0.360182	0.714233	0.0820275
MD11G1077200	1	0	-0.966988	0.19419	-0.236768			MD12G1194200	1	0	0.304198	0.910905	0.00616529
MD17G1155800	1	0	-0.845593	0.96242	-1.51511			MD05G1092300	1	0	0.703291	1.28539	0.513537
MD09G1262800	1	0	-1.09522	0.257721	-0.780742			MD02G1301300	1	0	-0.334322	0.549651	0.171134
MD06G1164000	1	0	-0.513927	0.373822	-0.726513			MD08G1134400	1	0	0.621662	0.294558	-0.300795
MD13G1182000	1	0	-0.617444	0.603793	-0.314727			MD17G1040300	1	0	0.303237	0.47496	0.22156
MD01G1224300	1	0	-0.90334	0.205139	-0.465539			MD09G1067100	1	0	0.538009	0.57536	0.697232
MD17G1000700	1	0	-0.205751	0.205028	-0.591285			MD09G1076000	1	0	0.39975	0.332633	0.347932
MD15G1199800	1	0	-0.654251	-0.0966844	-0.877556			MD00G1104000	1	0	-0.118163	0.647851	0.138693
MD16G1187300	1	0	-0.879333	0.255785	-0.451591			MD15G1244700	1	0	0.0442181	0.992055	0.615223
MD12G1259500	1	0	-0.657129	-0.373938	-0.653203			MD15G1137400	1	0	0.581071	0.0579423	-0.186218
MD15G1049700	1	0	-0.31677	1.2368	-0.744037			MD08G1195600	1	0	-0.0219806	0.863069	-0.0238239
MD09G1019600	1	0	-0.571921	0.290527	-0.377009			MD07G1293300	1	0	-0.385106	0.472453	0.495887
MD15G1285400	1	0	-0.831068	0.453545	-0.560789			MD17G1150400	1	0	0.0844582	0.90985	0.598727
MD02G1156800	1	0	-0.597313	0.209587	-0.799634			MD02G1317700	1	0	0.406107	1.14876	-0.0813784
MD10G1052200	1	0	-1.28248	0.492208	-0.530628			MD14G1167100	1	0	0.207227	0.414729	1.04865
MD09G1062500	1	0	-0.893003	-0.0881605	-0.92151			MD00G1040600	1	0	0.156123	0.460529	0.0954903
MD03G1119500	1	0	-0.262818	0.395578	-0.724763			MD09G1232300	1	0	0.162327	0.575555	0.0339372
MD02G1146800	1	0	-0.951464	0.189011	-0.807674			MD10G1279700	1	0	-0.0825418	0.779251	0.119854
MD02G1027600	1	0	-0.586	-0.454229	-0.525392			MD07G1130000	1	0	0.705557	0.483926	0.294043
MD08G1169900	1	0	-1.35187	-0.650715	-0.294349			MD15G1238500	1	0	0.28862	0.977635	0.813389
MD14G1223600	1	0	-0.816298	-0.276505	-1.89758			MD10G1137700	1	0	0.48196	1.03484	0.336991
MD06G1127600	1	0	-0.855022	0.302889	-1.11602			MD02G1065400	1	0	0.752696	0.833024	0.342936
MD12G1115100	1	0	-0.828428	0.141821	-1.32735			MD15G1029500	1	0	0.448228	0.510777	0.333754
MD09G1023600	1	0	-0.549357	0.382753	-0.204467			MD02G1089100	1	0	0.753866	1.07501	0.825919
MD13G1041300	1	0	-0.880068	0.314432	-0.128739			MD05G1350900	1	0	0.45815	1.05069	0.565945
MD15G1063600	1	0	-1.63587	0.0752356	0.28707			MD05G1300700	1	0	0.144798	0.745523	0.298171
MD04G1031400	1	0	-0.732008	0.205051	-0.65185			MD09G1114200	1	0	-0.0430445	0.6688	0.493799
MD07G1105900	1	0	-0.584594	0.483294	-0.396392			MD01G1150700	1	0	0.147027	0.780092	0.422076
MD07G1026600	1	0	-0.597201	-0.00780333	-0.544483			MD08G1032200	1	0	-0.161939	0.380904	0.172288
MD16G1134700	1	0	-0.535609	-0.30983	-0.537472			MD15G1162800	1	0	0.582326	1.23847	0.206526
MD16G1171500	1	0	-0.557177	-0.116723	-0.66746			MD04G1178000	1	0	0.467945	0.87643	0.604554
MD17G1112200	1	0	-0.996778	0.354054	-0.553033			MD12G1249800	1	0	-0.234944	0.509626	-0.170755
MD04G1205300	1	0	-0.768944	0.194794	-0.344147			MD00G1190700	1	0	0.246123	0.35239	-0.0212686
MD00G1056000	1	0	-0.798331	0.139792	-0.564839			MD01G1228800	1	0	0.962977	1.10501	-0.803679
MD12G1219500	1	0	-0.766581	0.0184288	-0.287521			MD01G1216400	1	0	0.178884	0.557565	0.48575
MD09G1264400	1	0	-0.813862	-0.0368495	-0.32091			MD15G1205500	1	0	0.0340797	0.470051	0.0464183
MD00G1057000	1	0	-1.86281	0.303931	0.271883			MD05G1230000	1	0	0.91884	1.21341	0.990981
MD01G1092700	1	0	-1.04337	0.980652	-0.913029			MD15G1090600	1	0	0.513378	0.49607	0.388209
MD04G1126400	1	0	-0.764411	-0.293513	-0.364648			MD16G1057700	1	0	-0.237501	0.860985	0.351927
MD06G1109400	1	0	-0.650245	0.612743	-0.327391			MD01G1080600	1	0	0.227817	0.33351	1.36522
MD14G1002400	1	0	-0.593116	0.886447	-0.374202			MD00G1220900	1	0	0.701152	0.575708	0.463228
MD00G1040000	1	0	-1.97253	-0.0758162	-0.50637			MD16G1067400	1	0	0.170372	0.525551	0.132156
MD16G1158900	1	0	-0.552688	0.0177228	-0.440556			MD14G1022200	1	0	0.359875	0.726624	0.336805
MD11G1235800	1	0	-1.45984	-0.247777	-0.375222			MD09G1256000	1	0	-0.698981	0.906872	0.395764
MD10G1102100	1	0	-1.27499	0.142984	-0.106915			MD14G1226900	1	0	0.00524801	0.565691	0.504379
MD15G1415600	1	0	-0.977198	-0.105528	-0.420495			MD14G1116300	1	0	0.128547	0.621112	0.440443
MD15G1343500	1	0	-1.59032	0.0759045	-0.27562			MD11G1107700	1	0	0.199343	0.727002	0.454189
MD00G1064000	1	0	-1.11513	-0.141562	-0.498133			MD13G1124900	1	0	-0.198653	0.738357	0.466067
MD16G1128400	1	0	-0.281756	-0.43181	-1.40502			MD06G1117300	1	0	0.648679	1.18137	0.373596
MD03G1139200	1	0	-0.590939	0.360114	-0.249409			MD05G1122000	1	0	0.981128	0.937803	1.00341
MD05G1179600	1	0	-0.849856	-0.116519	-1.38276			MD13G1067300	1	0	-0.265063	0.220952	0.525441
MD10G1292200	1	0	-1.06935	0.299848	-0.831217			MD10G1060900	1	0	-0.261394	0.571253	-0.0887515
MD03G1227300	1	0	-2.04922	0.053964	-0.622282			MD15G1034500	1	0	0.415813	0.526889	0.0450943
MD13G1081900	1	0	-0.890491	0.733226	-1.37081			MD10G1007200	1	0	0.510171	0.493351	0.422136
MD00G1085600	1	0	-0.48795	0.709623	-0.421052			MD11G1084300	1	0	0.407336	0.641366	-0.319752
MD13G1007700	1	0	-0.657482	0.728603	-0.137031			MD16G1031200	1	0	-0.198916	0.620033	-0.112427
MD04G1212600	1	0	-0.91872	0.138833	-1.41087			MD08G1098100	1	0	0.745881	0.177615	-0.358528
MD08G1044400	1	0	-1.33507	0.59057	0.0142068			MD14G1030000	1	0	0.0257527	0.507253	0.212881
MD03G1105100	1	0	-0.934584	-0.207916	-0.65657			MD09G1019300	1	0	0.26889	0.550536	0.353781
MD02G1033500	1	0	-0.972918	-0.445655	-0.424862			MD01G1091400	1	0	0.176007	0.457768	0.236114
MD07G1236200	1	0	-1.12749	-0.422518	-0.339889			MD15G1123200	1	0	0.297899	0.511462	0.355841
MD15G1405900	1	0	-0.294876	0.51858	-1.24173			MD06G1069800	1	0	0.0679524	0.83129	0.247983
MD12G1207600	1	0	-1.12475	0.177195	-1.27434			MD01G1159800	1	0	-0.141814	0.650216	0.359143
MD10G1006600	1	0	-1.65541	0.804253	-0.18128			MD08G1037800	1	0	-0.206788	0.436517	0.51082
MD16G1168400	1	0	-1.62882	0.328117	-0.804907			MD15G1390200	1	0	0.619563	0.589402	0.018433
MD01G1041200	1	0	-0.538442	0.0217963	-1.18965			MD00G1206800	1	0	0.194902	0.62164	0.533744
MD13G1090300	1	0	-1.01702	1.1351	-0.427253			MD02G1314300	1	0	0.120161	0.799551	0.166108
MD02G1189500	1	0	-0.524403	0.332847	-0.609773			MD06G1022000	1	0	0.204703	0.760823	0.688474
MD17G1140800	1	0	-0.46245	0.912571	-0.419344			MD01G1047200	1	0	0.380657	1.31879	0.406153
MD08G1134200	1	0	-1.89898	0.236611	-0.00627445			MD15G1015700	1	0	-0.473743	0.814768	0.38733
MD13G1186500	1	0	-0.926229	-0.02019	-0.280059			MD06G1140600	1	0	0.244573	0.491439	0.418323
MD03G1025100	1	0	-1.38433	-0.507066	-0.00862997			MD06G1039000	1	0	0.177418	1.27713	0.422738
MD09G1251300	1	0	-1.18494	0.115378	-0.514706			MD12G1180400	1	0	0.543974	0.885945	0.392931
MD12G1205700	1	0	-0.471724	0.0534304	-0.429981			MD14G1235700	1	0	0.65655	0.895414	0.201725
MD02G1167600	1	0	-1.8776	-0.345087	-0.461483			MD05G1230100	1	0	0.688077	0.932509	0.880395
MD09G1202600	1	0	-0.928378	0.445637	-0.606933			MD14G1103700	1	0	0.417489	0.649449	0.470655
MD16G1017900	1	0	-1.36911	-0.0683065	-0.457488			MD03G1140700	2	0	1.69887	2.25246	1.41186
MD10G1198000	1	0	-1.72796	0.690746	-0.357812			MD03G1245500	2	0	0.782545	1.72679	0.729466
MD01G1037200	1	0	-1.95069	-0.154658	-0.524031			MD12G1256100	2	0	1.13516	1.59899	0.878215
MD07G1207700	1	0	-0.990273	0.52275	-0.536095			MD15G1334900	2	0	1.65127	3.01741	1.82398
MD04G1214100	1	0	-0.479352	0.243333	-0.817577			MD16G1041900	2	0	0.399288	1.54196	0.933814
MD13G1111800	1	0	-0.651538	0.263019	-0.562965			MD09G1141100	2	0	1.60656	2.40792	0.854648
MD05G1242800	1	0	-1.18764	-0.21085	-0.283755			MD04G1135900	2	0	-0.0573374	0.950074	1.62857
MD07G1173900	1	0	-1.51789	0.0845231	-0.333662			MD16G1084300	2	0	0.770861	1.19374	1.46947
MD02G1307700	1	0	-1.52773	0.852363	0.244177			MD08G1249700	2	0	0.929789	1.24897	1.20198
MD07G1049600	1	0	-1.0823	0.0872234	-0.715954			MD09G1089200	2	0	0.0176003	0.745354	2.21388
MD00G1020400	1	0	-1.41631	-0.195395	0.466968			MD03G1137000	2	0	1.11145	1.29551	1.08079
MD11G1178000	1	0	-1.00832	1.08645	-0.000311519			MD05G1130300	2	0	0.690213	1.43393	0.94108
MD17G1222100	1	0	-0.871925	0.0677127	-0.476123			MD05G1224100	2	0	0.0804665	1.71545	1.01506
MD17G1266400	1	0	-0.402468	-0.0952128	-0.768749			MD10G1195200	2	0	0.754462	2.73007	1.28385
MD02G1019700	1	0	-1.17541	0.483221	-0.142759			MD07G1182200	2	0	0.624617	1.42752	0.788129
MD02G1308600	1	0	-0.889571	-0.133742	-0.927706			MD15G1039600	2	0	1.83659	2.29112	0.351736
MD05G1151200	1	0	-1.41592	-0.0725846	-0.342475			MD11G1076800	2	0	0.995906	1.66074	-0.0275234
MD17G1271500	1	0	0.400197	-0.0963172	-0.966429			MD01G1148600	2	0	0.812543	1.43334	0.641594
MD15G1154800	1	0	-1.33258	0.204076	-0.304617			MD05G1030800	2	0	1.10442	2.47014	0.914601
MD09G1017800	1	0	-0.698364	0.24724	-0.490319			MD07G1097400	2	0	0.351508	1.01832	0.900089
MD06G1122500	1	0	-1.07433	0.355664	-1.36808			MD09G1019900	2	0	0.384892	0.871535	1.38859
MD03G1037300	1	0	-0.78712	0.282793	-0.596381			MD00G1055100	2	0	1.05946	1.37662	0.904326
MD11G1147400	1	0	-0.469927	0.0899801	-0.405534			MD07G1259200	2	0	0.455528	1.37884	1.10117
MD12G1161200	1	0	-1.13301	-0.0530494	-0.131092			MD11G1262100	2	0	0.281112	1.77678	0.797486
MD16G1046600	1	0	-0.643366	-0.0585873	-0.525568			MD10G1299400	2	0	0.553249	1.78531	0.782159
MD11G1160000	1	0	-0.934954	0.00996004	-0.0374126			MD13G1140000	2	0	0.643361	1.7099	1.26669
MD07G1049400	1	0	-0.662943	0.52751	-1.33535			MD02G1315600	2	0	0.475912	2.28144	2.03823
MD11G1293300	1	0	-0.74039	-0.298729	-0.561446			MD12G1102600	2	0	0.54966	1.29559	0.820742
MD12G1252900	1	0	-1.09481	0.263636	-0.270971			MD04G1237100	2	0	0.354392	1.25903	0.939825
MD04G1248400	1	0	-0.908512	0.124517	-0.813211			MD05G1076000	2	0	0.794981	1.6184	1.21556
MD05G1118600	1	0	-1.46807	0.444708	-0.690983			MD10G1054500	2	0	0.690387	1.52986	1.41052
MD14G1174300	1	0	-0.959956	-0.240023	-0.574255			MD09G1016300	2	0	1.31658	2.31714	0.9713
MD17G1283900	1	0	-0.942134	0.41594	-0.607553			MD14G1084000	2	0	0.499784	1.90578	0.552545
MD09G1253600	1	0	-1.5743	0.144596	-0.705734			MD03G1242400	2	0	0.988265	1.5016	1.09018
MD03G1003200	1	0	-0.519748	-0.0809603	-1.28292			MD09G1152200	2	0	1.30059	1.79258	0.233605
MD11G1218000	1	0	-1.85052	-0.243817	0.0572849			MD14G1214900	2	0	1.18621	0.881499	2.20835
MD07G1235600	1	0	-0.840087	0.591925	-0.395543			MD15G1066300	2	0	0.467924	1.9445	0.976935
MD15G1070700	1	0	-1.90984	0.0225852	-0.564817			MD09G1059900	2	0	0.544488	1.17069	0.778968
MD15G1050100	1	0	-0.688319	0.21222	-1.02053			MD05G1218200	2	0	1.38219	2.37018	1.25117
MD07G1196200	1	0	-1.21875	0.236001	-0.889589			MD15G1086800	2	0	0.535773	1.85588	0.936194
MD05G1112700	1	0	-1.33805	0.0189538	-0.476494			MD17G1172800	2	0	0.448282	2.27931	1.27736
MD16G1113100	1	0	-0.337166	0.190418	-1.40354			MD11G1231900	2	0	0.595892	1.99731	1.26705
MD17G1205400	1	0	-0.932939	0.00612763	-0.578932			MD01G1196800	2	0	2.1317	3.51909	2.73129
MD02G1121300	1	0	-1.1471	-0.189932	-0.238857			MD13G1161100	2	0	0.515869	2.75961	0.626194
MD06G1202200	1	0	-1.18348	0.0784096	-0.529595			MD05G1135000	2	0	1.20381	1.42126	1.23901
MD16G1085500	1	0	-1.03356	-0.156823	-0.0737997			MD17G1062200	2	0	0.764915	1.41622	0.957734
MD13G1049400	1	0	-0.857616	0.0892434	-0.939081			MD06G1085500	2	0	1.31208	1.11652	1.55542
MD16G1040600	1	0	-1.80337	0.456574	0.111058			MD10G1170800	2	0	1.69537	2.14343	0.0211036
MD15G1126400	1	0	-1.15402	0.350531	-1.3711			MD08G1071000	2	0	0.99822	1.56078	1.07285
MD13G1095800	1	0	-0.372705	-0.414952	-1.42553			MD11G1097900	2	0	1.87852	3.00585	2.22768
MD14G1032100	1	0	-1.10621	0.138956	-0.836285			MD17G1224900	2	0	0.813214	1.85248	1.12067
MD01G1174400	1	0	-1.51896	-0.970244	0.284444			MD05G1002900	2	0	1.36428	3.29031	2.04565
MD17G1014600	1	0	-0.679331	0.203434	-0.796895			MD07G1006100	2	0	1.20507	2.75444	2.09137
MD13G1167100	1	0	-1.85817	0.0458719	-0.640275			MD00G1036300	2	0	-0.252328	1.12015	1.45171
MD02G1261000	1	0	-0.519922	0.0899936	-0.533759			MD11G1232100	2	0	1.15694	2.33353	1.45569
MD09G1192300	1	0	-0.442573	0.525511	-1.17467			MD07G1070400	2	0	0.654354	1.56837	0.30974
MD15G1052000	1	0	-0.868511	0.307788	-0.884498			MD16G1165100	2	0	0.618522	0.948522	1.07183
MD15G1430200	1	0	-0.0289823	-0.182052	-0.679633			MD11G1237400	2	0	0.269592	1.94198	0.600522
MD03G1052300	1	0	-1.03784	0.0992886	-0.532276			MD05G1028500	2	0	1.8228	2.24829	2.17042
MD15G1431700	1	0	-0.108616	0.0224971	-1.23121			MD15G1125200	2	0	0.580265	1.52791	0.523606
MD09G1253700	1	0	-1.46115	0.187499	-0.701264			MD15G1305200	2	0	0.678071	1.1925	1.4067
MD07G1053600	1	0	-1.05403	0.278496	-0.176408			MD00G1032400	2	0	0.679377	1.3485	1.70128
MD15G1077100	1	0	-0.797432	0.33297	-0.356277			MD07G1224500	2	0	1.49688	1.67382	0.280627
MD16G1102800	1	0	-1.48413	0.34756	-0.549056			MD09G1072800	2	0	0.723862	1.57116	1.64349
MD11G1120700	1	0	-1.00688	0.233286	-0.935303			MD02G1010800	2	0	0.91103	1.52665	1.41021
MD09G1207900	1	0	-0.342128	-0.0760501	-0.999494			MD14G1019800	2	0	0.718586	1.03858	2.12803
MD15G1092500	1	0	-0.424115	-0.238555	-1.00333			MD10G1338600	2	0	0.446408	0.784444	2.38666
MD12G1147700	1	0	-0.752795	0.779635	-0.0591378			MD03G1198600	2	0	0.326473	1.27139	0.747106
MD15G1327200	1	0	-0.730814	0.524432	-0.900993			MD16G1116300	2	0	0.538098	1.94792	1.00755
MD03G1272200	1	0	-0.378965	0.0205057	-0.578079			MD03G1049900	2	0	0.898489	1.84892	1.80023
MD09G1255500	1	0	-0.584572	0.187529	-0.407414			MD10G1240500	2	0	1.16137	3.80641	3.24504
MD16G1144100	1	0	-0.952782	0.0619542	-0.691436			MD12G1086800	2	0	1.28991	2.1578	1.31424
MD07G1270800	1	0	-1.05548	0.194785	-1.31599			MD15G1091000	2	0	0.947626	1.41235	0.783248
MD11G1035900	1	0	-0.791498	0.0130602	-0.650292			MD13G1161200	2	0	0.324544	2.64208	-0.143801
MD15G1244600	1	0	-0.824054	0.649094	-0.188668			MD13G1050000	2	0	1.63844	1.38715	2.66186
MD13G1087900	1	0	-0.948129	0.401415	-0.400063			MD02G1107000	2	0	1.26174	1.60431	0.135079
MD05G1092000	1	0	-0.782437	-0.325498	-0.395067			MD13G1213100	2	0	0.502865	1.22406	1.00938
MD00G1003800	1	0	-1.07031	0.134234	-0.474047			MD07G1213300	2	0	1.38479	0.482773	1.98933
MD06G1083000	1	0	-0.413609	-0.072432	-1.22722			MD09G1098600	2	0	0.831359	1.0274	1.35139
MD11G1016200	1	0	-1.22834	0.572627	-0.747489			MD11G1012500	2	0	1.03391	2.21208	1.36145
MD15G1232200	1	0	-0.198102	0.245789	-0.913449			MD01G1000200	2	0	0.720496	1.75908	0.767128
MD04G1201800	1	0	-0.42813	-0.337445	-0.562724			MD11G1270600	2	0	1.31039	1.45154	0.996938
MD03G1125800	1	0	-1.14287	0.209001	-0.854794			MD11G1270500	2	0	1.06097	1.36756	0.805792
MD06G1118000	1	0	-0.592062	0.193363	-0.738781			MD01G1086900	2	0	1.01327	1.89404	0.808379
MD14G1220100	1	0	-0.608843	0.352125	-0.422521			MD13G1222900	2	0	0.77474	1.41682	0.604046
MD04G1068400	1	0	-1.07955	0.492509	-0.289933			MD02G1232400	2	0	0.107463	1.7365	0.900015
MD16G1179900	1	0	-0.981014	0.083155	-0.547952			MD11G1004100	2	0	0.761543	2.00811	1.38756
MD05G1150100	1	0	-1.36967	0.410605	-0.279861			MD14G1103900	2	0	0.99906	0.590517	1.71308
MD10G1066500	1	0	-0.677856	0.496557	-0.580001			MD16G1071400	2	0	-0.0413476	1.18155	1.09713
MD09G1042300	1	0	-1.10078	0.445404	-0.825349			MD15G1346800	2	0	0.105539	1.28008	0.864749
MD13G1165200	1	0	-1.40782	0.434917	-0.842881			MD16G1085600	2	0	0.448724	1.01462	0.956729
MD03G1185600	1	0	-1.28254	-0.0528167	0.0201886			MD07G1200300	2	0	0.635235	1.95549	0.495835
MD15G1250600	1	0	-0.763301	-0.441129	-0.588908			MD09G1013000	2	0	0.945637	1.30102	2.24009
MD03G1028800	1	0	-0.990332	0.811765	-0.15151			MD02G1005600	2	0	1.4485	0.862744	2.19807
MD07G1018100	1	0	-1.32357	0.50584	-0.139912			MD14G1197300	2	0	0.686968	1.65078	0.769756
MD07G1180100	1	0	-0.841292	0.735199	-0.380557			MD17G1130100	2	0	0.116782	1.81221	1.05262
MD15G1301100	1	0	-0.918119	0.0689136	-0.596691			MD09G1180300	2	0	0.738462	1.57261	0.437691
MD03G1116800	1	0	-1.2763	0.344449	-0.486281			MD15G1235900	2	0	0.402953	1.15825	1.0109
MD13G1194900	1	0	-0.872141	-0.182613	-0.610391			MD10G1175000	2	0	0.969417	2.13965	1.42246
MD15G1271000	1	0	-1.16481	-0.01677	-0.569541			MD07G1064100	2	0	1.11737	1.99867	1.19754
MD10G1008800	1	0	-1.01164	0.0543889	-0.664127			MD11G1171100	2	0	1.42437	2.02324	1.70554
MD15G1291700	1	0	-0.950356	0.184507	0.192804			MD05G1119300	2	0	1.40919	1.61264	1.31914
MD00G1007800	1	0	-0.886837	0.468153	-0.173961			MD05G1144000	2	0	0.794732	2.27362	1.44121
MD11G1028200	1	0	0.267146	-0.573942	-2.02354			MD17G1240400	2	0	0.868567	1.37352	0.983186
MD11G1003600	1	0	-0.236716	0.57414	-1.14825			MD15G1286200	2	0	1.1773	2.57443	1.22934
MD05G1146600	1	0	-0.803454	-0.206438	-0.0650362			MD17G1238800	2	0	1.16786	1.37907	1.44177
MD07G1298700	1	0	-0.686413	-0.105969	-1.29886			MD14G1193100	2	0	1.15558	2.29572	1.59743
MD05G1129600	1	0	-0.628093	-0.0408349	-0.33693			MD16G1097400	2	0	0.315963	1.54531	0.971896
MD07G1001300	1	0	-0.933499	0.962106	-0.126089			MD00G1115400	2	0	0.191019	1.31294	1.30237
MD01G1076400	1	0	-0.0377653	0.133538	-0.806753			MD10G1077900	2	0	0.160019	1.24895	0.867682
MD05G1059800	1	0	-0.640377	0.3587	-1.03235			MD06G1215000	2	0	0.91066	1.07825	1.86568
MD10G1065900	1	0	-0.284009	0.121029	-1.07235			MD09G1102100	2	0	0.691472	1.85523	1.74334
MD15G1153100	1	0	-0.920756	0.108515	-0.740304			MD03G1273500	2	0	0.820228	1.37135	1.06293
MD12G1019500	1	0	-0.0714494	-0.267452	-1.53788			MD11G1232700	2	0	0.840841	1.63424	1.25645
MD10G1044500	1	0	-1.58327	-0.235115	-0.15537			MD06G1199100	2	0	1.04881	0.949795	2.18921
MD11G1247600	1	0	-1.04341	-0.209494	-0.265529			MD12G1006400	2	0	1.32705	1.46828	0.68057
MD04G1003600	1	0	-1.01336	0.226321	-0.400868			MD01G1177000	2	0	0.570153	2.58387	1.2727
MD15G1414100	1	0	-0.704561	1.20333	-0.171285			MD16G1135100	2	0	0.78068	1.60416	0.837014
MD12G1097300	1	0	-1.18474	0.128645	-0.877563			MD10G1276500	2	0	1.38959	1.23823	2.5633
MD06G1062900	1	0	-1.39718	-0.62803	-0.360511			MD11G1289800	2	0	0.7671	1.45947	1.19685
MD02G1183900	1	0	-0.704862	0.831633	-0.0364904			MD08G1111500	2	0	1.22133	2.02012	0.695788
MD05G1087900	1	0	-1.21768	-0.0819783	-0.527369			MD02G1120200	2	0	1.18186	2.081	0.0657782
MD07G1002500	1	0	-0.688718	-0.125448	-0.60533			MD04G1147700	2	0	0.923342	0.801987	2.10878
MD15G1244200	1	0	-0.788984	0.154116	-0.46516			MD17G1003300	2	0	0.558868	1.30159	0.896507
MD17G1265700	1	0	-1.43914	0.0710498	0.615691			MD06G1212900	2	0	1.74446	1.75637	0.670599
MD16G1175400	1	0	-0.19689	-0.681102	-1.46936			MD17G1278100	2	0	1.13895	1.5599	1.40111
MD11G1246600	1	0	-0.790328	0.611479	-0.371385			MD15G1078900	2	0	0.652513	2.37315	0.570237
MD10G1129100	1	0	-1.07201	0.435499	-0.285944			MD01G1213600	2	0	0.576757	1.66687	0.474011
MD09G1073300	1	0	-0.0656459	-0.602365	-1.87691			MD16G1003000	2	0	-0.176406	1.25513	1.47764
MD13G1049800	1	0	-0.941931	-0.110385	-0.351739			MD11G1003700	2	0	0.967577	1.08539	1.88532
MD01G1146300	1	0	-1.81475	-0.624231	-0.275978			MD09G1233000	2	0	1.18581	2.25262	1.85459
MD17G1113600	1	0	-0.84574	0.345015	-0.995143			MD06G1111900	2	0	0.511834	1.61245	0.717546
MD17G1045600	1	0	-1.77266	0.271641	0.0525008			MD12G1020800	2	0	1.12449	1.53017	2.05881
MD11G1140600	1	0	-0.826643	0.0943514	-1.61566			MD11G1210800	2	0	0.385107	1.16308	1.43044
MD14G1035800	1	0	-0.893476	-0.206494	-0.0989645			MD03G1076400	2	0	2.33012	2.06896	3.16057
MD11G1060100	1	0	-0.768163	-0.0800509	-0.933512			MD13G1041700	2	0	1.99848	3.67715	2.36837
MD15G1240800	1	0	-1.16368	0.166045	-0.917437			MD05G1031600	2	0	0.332247	1.30455	0.845252
MD17G1078100	1	0	-1.63033	0.314634	-0.644668			MD10G1164400	2	0	0.580501	1.76565	0.781759
MD08G1227000	1	0	-1.55561	0.282252	-0.550812			MD06G1203800	2	0	1.11109	0.743884	1.99235
MD14G1006700	1	0	-1.25834	0.399652	-0.892712			MD01G1158900	2	0	0.915027	1.06571	1.90874
MD05G1362300	1	0	-1.17902	-0.0436115	-0.563813			MD13G1134700	2	0	0.790967	1.69429	0.817044
MD01G1076900	1	0	-0.32339	0.496165	-0.434991			MD12G1012700	2	0	0.607925	1.19378	0.790502
MD05G1335200	1	0	-1.21327	0.324673	0.291336			MD02G1034700	2	0	0.510538	1.57241	0.898351
MD04G1006100	1	0	-0.816111	0.323395	-0.342384			MD16G1170400	2	0	0.716621	0.909644	1.52351
MD06G1034300	1	0	-1.43283	0.170753	-0.475533			MD10G1331600	2	0	0.334432	1.59007	0.864154
MD12G1218900	1	0	-0.659155	0.268176	-1.13229			MD16G1047500	2	0	0.893589	1.71846	1.10413
MD08G1015000	1	0	-0.464572	-0.13031	-1.30538			MD04G1197100	2	0	0.991335	1.91787	0.799046
MD16G1009600	1	0	-0.644421	0.625578	-0.734435			MD07G1246300	2	0	0.476867	1.15165	0.957894
MD06G1086700	1	0	-0.620424	0.0677344	-1.13761			MD17G1131600	2	0	0.913444	1.20154	1.08161
MD15G1160600	1	0	-1.14315	0.465717	-0.873571			MD10G1290300	2	0	0.92641	1.63341	0.708052
MD05G1158200	1	0	-0.986454	0.244255	-0.789698			MD00G1075400	2	0	0.617261	2.10125	1.77508
MD11G1280100	1	0	-1.53267	0.631651	-0.355319			MD15G1043200	2	0	0.380256	1.68469	1.15435
MD11G1066100	1	0	-0.418656	0.422612	-0.71397			MD09G1045300	2	0	0.839947	1.38812	0.597509
MD11G1041500	1	0	-0.941047	0.260877	-0.669262			MD17G1130000	2	0	0.0661778	2.05027	0.646535
MD16G1033400	1	0	-1.74029	-0.108142	-0.235192			MD15G1362100	2	0	0.703396	1.67829	0.649907
MD16G1166000	1	0	-1.05641	0.150084	-0.807863			MD11G1010000	2	0	1.7646	2.7374	1.51792
MD11G1209400	1	0	-2.01185	0.0575712	-0.587103			MD09G1140700	2	0	1.4166	2.19469	0.525993
MD01G1016600	1	0	-0.677596	-0.138167	-1.1524			MD02G1177100	2	0	0.822347	0.918562	1.88565
MD17G1056800	1	0	-1.64231	0.64573	-0.101586			MD15G1235800	2	0	0.466638	1.30562	0.895695
MD11G1132400	1	0	-1.2957	0.202132	0.011895			MD01G1148500	2	0	0.78179	1.63352	1.21427
MD02G1249800	1	0	-1.12084	0.659609	-0.843602			MD03G1187400	2	0	0.320951	1.29556	0.986869
MD10G1170300	1	0	-1.39805	0.859854	-0.676279			MD15G1220400	2	0	0.909768	1.46447	0.881719
MD02G1180400	1	0	-1.61738	0.317795	-0.772709			MD07G1043400	2	0	0.979346	2.02443	1.28929
MD03G1189700	1	0	-1.10595	0.158576	-0.684862			MD14G1239800	2	0	1.61635	2.64654	3.07916
MD08G1102800	1	0	-0.817819	0.287043	-0.421802			MD05G1282700	2	0	0.515249	1.51074	1.39115
MD05G1286600	1	0	-0.625123	0.49105	-0.766188			MD13G1115700	2	0	0.0328443	1.24618	0.901711
MD17G1233500	1	0	-0.565841	0.508691	-0.657892			MD02G1020800	2	0	0.521921	1.2408	1.00234
MD17G1243800	1	0	-1.39872	-0.0510288	-0.223974			MD03G1136800	2	0	1.36409	1.55771	1.32097
MD13G1002100	1	0	-0.490689	-0.00355046	-0.472401			MD14G1076500	2	0	-0.0680386	2.13067	0.369855
MD11G1111600	1	0	-1.17619	0.276953	-0.0457868			MD07G1246000	2	0	0.207133	1.38626	1.01109
MD03G1071900	1	0	-1.08579	0.522175	-0.654507			MD10G1120200	2	0	0.835258	2.06434	0.83665
MD02G1185000	1	0	-0.925737	0.391532	-0.00703518			MD12G1168100	2	0	0.659491	1.92348	0.459593
MD12G1242500	1	0	-1.85875	-0.595243	0.0169567			MD14G1202100	2	0	0.967344	1.24138	1.33298
MD03G1137900	1	0	-1.13392	0.0474196	-0.438651			MD15G1381800	2	0	0.503272	1.5508	0.847327
MD17G1010400	1	0	-1.09146	0.203476	-0.973132			MD03G1259100	2	0	0.814	2.27745	0.872191
MD15G1331000	1	0	-0.822393	0.261575	-0.149798			MD16G1116600	2	0	0.617122	1.45503	0.835775
MD01G1093200	1	0	-2.01708	-0.110629	-0.41432			MD11G1171500	2	0	1.77985	2.8784	1.77718
MD15G1241500	1	0	-0.757855	-0.10932	-0.57079			MD15G1152700	2	0	0.928424	1.57819	0.749783
MD01G1072900	1	0	-1.33561	0.706062	-0.257085			MD10G1142100	2	0	0.896659	1.08074	1.31226
MD14G1182000	1	0	-0.891031	0.883844	-0.652782			MD05G1197600	2	0	1.35998	1.5455	1.3205
MD03G1160300	1	0	-1.2639	0.0885185	-0.00287261			MD08G1174800	2	0	0.854419	0.703683	1.76969
MD13G1164200	1	0	-0.621802	-0.0307354	-0.428616			MD15G1283700	2	0	0.308063	1.65267	1.29658
MD17G1229500	1	0	-0.980632	0.540552	-0.537101			MD09G1276300	2	0	0.567967	1.32219	0.848844
MD14G1012300	1	0	-1.15079	0.262924	-1.21252			MD07G1248700	2	0	0.355732	2.57321	0.615017
MD11G1056600	1	0	-1.74756	-0.0296102	-0.632444			MD17G1009900	2	0	0.319624	1.46334	1.03252
MD02G1125100	1	0	-0.815097	-0.0650576	-0.780168			MD02G1121200	2	0	0.606305	1.55599	1.86156
MD12G1201100	1	0	-1.50085	-0.128486	-0.462551			MD07G1285200	2	0	1.1266	1.47367	1.478
MD02G1198700	1	0	-0.346136	0.104078	-1.02398			MD15G1235300	2	0	1.62435	1.98002	1.64478
MD10G1006500	1	0	-1.63203	0.705167	-0.133817			MD11G1169800	2	0	0.754228	1.19116	1.00309
MD05G1109100	1	0	-0.269519	-0.493765	-2.01924			MD09G1141700	2	0	1.49686	2.06624	0.479399
MD15G1136400	1	0	-0.356612	0.455261	-0.348878			MD13G1063900	2	0	0.628027	1.46484	0.46009
MD10G1275500	1	0	-0.498018	0.490344	-0.487959			MD13G1127100	2	0	1.19328	1.75721	0.794514
MD00G1016800	1	0	-0.952775	0.0460306	-0.531491			MD01G1148700	2	0	1.34828	1.75661	0.874409
MD08G1057100	1	0	-0.974374	0.279279	-0.555021			MD10G1236700	2	0	0.797477	1.40085	0.648023
MD01G1218300	1	0	-0.646324	0.290876	-0.752409			MD00G1152400	2	0	1.27416	2.63085	1.20345
MD03G1062400	1	0	-1.5881	0.385634	-0.103903			MD15G1287000	2	0	1.51632	1.38136	2.47898
MD14G1124200	1	0	-0.56302	0.404925	-1.13334			MD10G1192800	2	0	1.19515	1.88812	0.890281
MD15G1213900	1	0	-1.02184	0.140695	-0.0333198			MD07G1272000	2	0	1.37196	1.60843	1.35116
MD17G1014500	1	0	-1.09549	0.247642	-0.317853			MD14G1155800	2	0	1.04215	1.45544	1.64387
MD01G1234000	1	0	-0.533806	-0.0676121	-0.270162			MD17G1110000	2	0	1.46939	1.66998	3.06452
MD04G1168900	1	0	-0.942628	0.20248	-0.321817			MD16G1054800	2	0	1.11679	0.739804	1.99647
MD17G1163300	1	0	-0.989956	-0.374015	-0.462718			MD15G1283200	2	0	0.964132	1.5787	1.02698
MD16G1081100	1	0	-1.01375	0.243301	-1.42228			MD13G1109000	2	0	0.36991	1.20104	0.914608
MD09G1015700	1	0	-1.6105	-0.644223	-0.380904			MD08G1080000	2	0	0.421598	1.4608	1.037
MD11G1144600	1	0	-0.557543	-0.241459	-1.17815			MD15G1021500	2	0	1.18248	1.88437	0.0551476
MD15G1059100	1	0	-1.10325	0.382914	-0.365429			MD01G1062000	2	0	0.306742	1.22738	1.64099
MD03G1088600	1	0	-1.15619	-0.250442	-0.190874			MD11G1133200	2	0	1.43386	0.873102	2.47952
MD02G1307400	1	0	-1.12634	0.315686	-0.208646			MD17G1211300	2	0	0.98094	1.70426	0.793564
MD14G1205600	1	0	-0.48338	0.21483	-1.11432			MD13G1132800	2	0	0.752951	1.25771	0.960517
MD10G1020000	1	0	-1.57481	0.0463586	-0.578691			MD05G1293800	2	0	0.53498	2.17761	0.659913
MD17G1112700	1	0	-1.14956	0.186359	-0.658798			MD10G1184700	2	0	0.720122	1.85409	0.686799
MD07G1291000	1	0	-1.58696	-0.161994	-0.354944			MD13G1055700	2	0	1.54402	1.24405	2.5164
MD03G1020400	1	0	-0.747181	0.450935	-0.635105			MD15G1206800	2	0	0.774387	1.17137	1.98008
MD05G1260700	1	0	-0.961133	0.363068	0.0322142			MD02G1089800	2	0	1.568	1.97313	-0.392712
MD10G1262000	1	0	-0.887131	-0.025291	-1.49749			MD05G1198700	2	0	1.37521	1.97831	1.33671
MD09G1187200	1	0	-0.918788	0.291165	-0.768107			MD17G1218200	2	0	0.287302	1.49015	0.935105
MD08G1244800	1	0	-0.921915	0.327878	-0.258562			MD15G1170000	2	0	-0.471974	0.508203	1.63828
MD15G1355600	1	0	-0.823266	-0.195715	-0.670457			MD08G1240600	2	0	1.56257	2.02607	-0.0280301
MD13G1054600	1	0	-0.174356	0.289834	-0.615375			MD15G1420600	2	0	1.09623	2.72496	1.67804
MD02G1011100	1	0	0.04257	-0.296168	-1.20409			MD00G1082100	2	0	0.608352	1.60106	0.678325
MD00G1012600	1	0	-0.772109	0.158362	-0.217396			MD08G1244700	2	0	1.55265	1.18154	2.87285
MD16G1074900	1	0	-1.30133	0.167783	-0.572843			MD16G1027500	2	0	0.68503	2.16894	1.36113
MD15G1040100	1	0	-1.31691	0.280642	-0.862851			MD08G1072900	2	0	0.832643	1.35521	0.921193
MD08G1003700	1	0	-0.823304	0.627241	-0.373187			MD05G1168400	2	0	0.993053	2.19143	1.41375
MD16G1204900	1	0	-1.5178	0.548742	0.194343			MD10G1226100	2	0	0.858673	1.11599	1.22832
MD14G1011900	1	0	-1.58466	0.028777	-0.525849			MD15G1035800	2	0	0.54614	1.45609	1.30398
MD12G1107400	1	0	-0.777418	0.0786444	-1.36114			MD01G1153600	2	0	1.10929	2.56988	0.823365
MD03G1023100	1	0	-0.906336	0.196627	-0.787195			MD07G1008900	2	0	0.816643	1.44803	0.683825
MD13G1009100	1	0	-0.865774	0.479094	-0.36786			MD04G1030100	2	0	0.794667	1.09454	1.64462
MD03G1252200	1	0	-1.19003	0.674446	-1.25256			MD07G1071900	2	0	2.04394	1.78313	3.20561
MD11G1239800	1	0	-0.808844	1.39667	-0.131908			MD13G1172100	2	0	0.188376	2.18788	-0.229377
MD02G1042300	1	0	-0.0758486	-0.388618	-1.3689			MD17G1099600	2	0	0.143558	1.33445	0.944729
MD13G1080300	1	0	-0.680258	-0.296299	-1.42505			MD16G1035500	2	0	1.15272	2.40768	0.9036
MD15G1281500	1	0	-1.26842	0.055111	0.316278			MD04G1025600	2	0	0.638844	1.69842	1.18309
MD09G1063500	1	0	-0.97778	0.231254	-0.454548			MD05G1324100	2	0	0.574419	1.58836	0.9907
MD08G1030000	1	0	-1.46724	-0.0329046	-0.325915			MD10G1064900	2	0	0.948212	1.54541	0.49298
MD03G1078600	1	0	-1.54699	-0.204447	0.941842			MD10G1340100	2	0	0.888474	2.07828	1.21951
MD04G1191700	1	0	-1.63141	0.122344	-0.507637			MD16G1154000	2	0	1.03419	2.01964	1.33519
MD00G1208300	1	0	-0.429762	-0.21026	-0.960748			MD03G1212400	2	0	1.15606	0.842912	2.26378
MD03G1292400	1	0	-1.07337	0.435671	-0.115876			MD06G1142200	2	0	0.520843	1.63013	1.12945
MD16G1048500	1	0	-1.11954	0.0609177	-0.591642			MD05G1216300	2	0	0.510199	1.10315	1.30062
MD12G1232900	1	0	-1.18969	0.5437	-0.803874			MD05G1189100	2	0	0.82756	1.8872	0.826787
MD15G1418100	1	0	-1.86689	0.0784428	-0.515767			MD06G1214400	2	0	0.848188	1.78103	0.680999
MD02G1035500	1	0	-0.297041	0.767305	-0.557182			MD05G1331700	2	0	0.694643	1.50327	1.08541
MD04G1068800	1	0	-0.659437	-0.0379015	-0.688939			MD17G1127800	2	0	0.744105	2.41463	1.25707
MD08G1097000	1	0	-0.973077	-0.198685	-0.471669			MD10G1310600	2	0	1.22857	1.75457	0.492909
MD07G1153300	1	0	-0.421933	-0.388213	-1.31949			MD17G1099500	2	0	0.093487	1.29526	0.91498
MD09G1155600	1	0	-0.747422	0.1362	-0.451845			MD09G1141200	2	0	1.0826	1.67945	0.00897854
MD05G1238300	1	0	-0.797986	0.316403	-0.243673			MD15G1097500	2	0	1.05151	2.03073	1.27385
MD16G1077800	1	0	-1.5739	0.425583	-0.758878			MD01G1213100	2	0	0.297839	2.16856	0.632555
MD15G1207500	1	0	-1.31454	0.435102	-0.511136			MD11G1076600	2	0	0.854374	1.91681	0.163704
MD04G1077000	1	0	-1.04599	0.108129	-0.656098			MD02G1204100	2	0	0.848104	1.52449	0.613832
MD04G1225100	1	0	-0.230589	-0.269688	-1.69157			MD12G1256500	2	0	0.399982	1.06346	0.820264
MD01G1160400	1	0	-0.96076	0.00321911	-0.129297			MD08G1241000	2	0	1.08945	1.73534	1.10899
MD07G1183600	1	0	-1.85716	-0.261681	0.487793			MD02G1168100	2	0	1.01636	1.91617	1.22469
MD11G1110000	1	0	-0.947568	0.261609	-0.383007			MD03G1242000	2	0	0.804424	1.97009	1.10876
MD08G1227400	1	0	-0.753559	-0.364259	-1.71665			MD17G1211000	2	0	1.37975	2.42526	1.51393
MD10G1164000	1	0	-0.814054	0.73363	0.0114384			MD03G1188200	2	0	1.10607	1.56697	0.959938
MD01G1201800	1	0	-1.01359	1.17489	-0.54279			MD15G1208300	2	0	2.90471	1.47563	-0.0530796
MD08G1094900	1	0	-1.25247	0.236081	0.219275			MD04G1133600	2	0	0.740831	2.11665	1.11396
MD04G1147100	1	0	-0.699512	0.0215812	-1.09913			MD17G1125900	2	0	0.554596	1.2024	0.926214
MD07G1153200	1	0	-1.54641	0.211456	-0.531609			MD09G1103300	2	0	0.445535	1.57221	0.978833
MD17G1004300	1	0	-1.67328	0.363761	-0.621086			MD12G1220700	2	0	0.711416	1.751	1.07523
MD12G1194700	1	0	-1.15006	0.631014	-1.03715			MD17G1150300	2	0	0.26649	2.2445	0.846547
MD15G1004100	1	0	-1.05564	0.227411	-0.507001			MD17G1287500	2	0	0.740243	1.72817	0.291137
MD06G1207800	1	0	-0.755259	-0.4136	-0.595754			MD16G1151000	2	0	0.670657	1.43495	0.824342
MD14G1179400	1	0	-1.29711	-0.0808818	-0.444233			MD17G1007300	2	0	0.971522	1.33787	0.722692
MD15G1089300	1	0	-1.10392	-0.00892169	-0.33787			MD11G1296600	2	0	0.842698	1.42265	0.409716
MD15G1422700	1	0	-0.793317	-0.201333	-0.538402			MD08G1038600	2	0	1.24738	1.89584	1.4795
MD08G1112900	1	0	-0.779743	0.0107471	-1.09203			MD15G1278700	2	0	0.47396	1.57117	0.919911
MD06G1114400	1	0	-0.628075	-0.00265659	-0.608782			MD00G1061100	2	0	1.43148	1.00608	2.53552
MD06G1173100	1	0	-1.35512	0.383853	-0.34888			MD10G1254300	2	0	1.84189	2.53326	1.88762
MD14G1117300	1	0	-1.18708	0.112931	-0.293494			MD16G1085700	2	0	1.14011	2.53101	1.50597
MD09G1106400	1	0	-0.612472	-0.0959753	-1.73881			MD12G1089500	2	0	0.937878	1.3061	1.20377
MD13G1102400	1	0	-0.669443	0.298502	-0.531479			MD10G1286600	2	0	0.727094	1.61496	0.301146
MD12G1237400	1	0	-1.43679	0.261513	-0.561751			MD08G1006000	2	0	0.346405	1.48112	0.855116
MD02G1250800	1	0	-1.01519	-0.194616	0.00403162			MD03G1078200	2	0	0.963566	1.90828	0.31092
MD16G1053400	1	0	-0.638352	0.17619	-0.95675			MD12G1036700	2	0	0.349302	1.51776	0.803982
MD12G1249300	1	0	-0.767728	0.279921	-0.448628			MD05G1337400	2	0	1.41586	1.55746	0.579196
MD11G1246200	1	0	-1.48084	0.145769	-0.424649			MD17G1064300	2	0	1.09739	1.19518	2.24367
MD07G1297800	1	0	-0.288839	0.565623	-1.10858			MD06G1138500	2	0	0.749875	2.03679	0.600202
MD02G1266300	1	0	-1.64487	-0.0318566	0.462406			MD09G1084600	2	0	0.918569	2.01813	1.10979
MD16G1007200	1	0	-0.342386	0.524842	-0.345859			MD13G1064500	2	0	0.481092	1.05647	0.965374
MD10G1140700	1	0	-1.91054	-0.0331225	-0.53433			MD07G1001400	2	0	0.422302	0.866708	1.53306
MD06G1094700	1	0	-1.0162	0.387825	-0.167238			MD03G1140300	2	0	0.337003	1.90787	0.609308
MD10G1095100	1	0	-0.497718	0.193955	-0.610233			MD11G1173500	2	0	1.61464	2.14959	1.39869
MD04G1180000	1	0	-0.8161	-0.290166	-0.432111			MD02G1047500	2	0	0.874186	1.48513	1.28252
MD14G1228600	1	0	-0.900465	0.117526	-0.773504			MD07G1277000	2	0	1.61719	1.35379	2.72123
MD13G1018800	1	0	-0.671317	0.314003	-0.819208			MD10G1015800	2	0	1.39467	1.05286	2.48104
MD03G1148500	1	0	-1.97972	0.531621	0.392464			MD16G1116200	2	0	0.676096	2.34235	1.01603
MD02G1120400	1	0	-0.458967	0.584953	-0.207338			MD02G1154100	2	0	0.613783	1.45935	1.01139
MD09G1034400	1	0	-1.6701	-0.279948	-0.258105			MD04G1154600	2	0	0.407915	1.25014	0.783211
MD13G1125400	1	0	-1.66681	0.315633	-0.391538			MD05G1081100	2	0	0.595495	1.8712	0.0834278
MD10G1025300	1	0	-1.04566	0.405088	-0.923469			MD12G1263800	2	0	0.942398	1.48276	1.13709
MD05G1222200	1	0	-0.397093	-0.253213	-0.568184			MD12G1161000	2	0	0.737032	0.630321	1.82166
MD01G1008700	1	0	-0.669335	-0.184543	-0.411241			MD05G1132700	2	0	0.759749	1.39889	1.37215
MD08G1094100	1	0	-1.19978	0.0543423	-0.57215			MD06G1013900	2	0	1.04074	1.55564	1.15123
MD05G1357200	1	0	-1.30804	0.866048	-0.986547			MD07G1070500	2	0	0.734976	1.75087	0.369199
MD12G1011400	1	0	-1.40012	0.232917	-0.64241			MD10G1045900	2	0	1.21748	1.84111	1.3105
MD16G1169200	1	0	-1.64097	0.271349	-0.312396			MD13G1051400	2	0	1.01861	3.03945	1.74157
MD05G1159000	1	0	-0.96547	0.428697	-0.572286			MD15G1008100	2	0	1.30186	2.61212	1.56766
MD14G1135600	1	0	-0.827944	0.177779	-0.701994			MD06G1105500	2	0	0.595983	1.40474	1.24564
MD10G1267600	1	0	-0.643615	-0.0165587	-0.797202			MD04G1185600	2	0	0.0649368	2.80882	2.67938
MD02G1287500	1	0	-1.42328	-0.0968961	-0.345347			MD10G1309900	2	0	1.13149	1.41517	0.247104
MD11G1056900	1	0	-0.214759	0.1564	-1.07861			MD13G1071600	2	0	0.475078	1.12531	0.861803
MD09G1113900	1	0	-1.80169	0.246121	-0.229883			MD02G1140000	2	0	0.00330555	1.15388	0.812306
MD04G1166900	1	0	-0.911447	-0.0888572	-0.560704			MD16G1066800	2	0	0.587575	1.39385	0.96104
MD01G1063400	1	0	-1.92617	0.222275	-0.0519448			MD15G1349000	2	0	0.488887	1.65701	1.94579
MD01G1045500	1	0	-0.523296	-0.0970524	-1.33653			MD07G1246200	2	0	0.584591	1.62905	1.21401
MD00G1049200	1	0	-1.3737	0.522958	-0.597553			MD11G1121200	2	0	0.912698	1.7804	0.784507
MD17G1102300	1	0	-1.01234	0.378211	-0.193921			MD07G1282000	2	0	1.13425	2.12631	1.07389
MD14G1088200	1	0	-1.24097	0.609125	-0.302214			MD16G1110600	2	0	0.325702	1.23135	1.1834
MD13G1273200	1	0	-1.66929	0.497858	0.172265			MD12G1147500	2	0	0.79738	1.94781	1.02616
MD02G1199800	1	0	-1.1459	0.261586	-0.873715			MD11G1018500	2	0	0.596889	1.59215	0.90621
MD01G1195000	1	0	-1.00326	0.0432656	-0.415037			MD13G1206900	2	0	1.14069	1.70878	1.75679
MD15G1077000	1	0	0.119922	0.00443234	-1.20327			MD11G1159200	2	0	0.888779	1.62973	1.31115
MD04G1127200	1	0	-0.758041	-0.320826	-0.42526			MD05G1056800	2	0	0.538316	1.88585	0.96192
MD16G1045500	1	0	-0.813076	0.887456	-1.00607			MD16G1116100	2	0	1.68416	3.87431	1.6117
MD10G1329200	1	0	-0.287521	0.0699077	-1.11906			MD02G1145100	2	0	0.86549	1.32391	1.89087
MD14G1002300	1	0	-0.723481	-0.0778873	-0.444935			MD04G1017200	2	0	0.89944	1.37046	0.854397
MD13G1129700	1	0	-0.29188	-0.0507767	-1.17157			MD17G1218300	2	0	0.963368	1.99919	1.47187
MD08G1193300	1	0	-0.587747	0.0756383	-0.391423			MD01G1016100	2	0	0.882482	1.92333	1.09503
MD13G1021200	1	0	-0.863529	0.490943	-0.681921			MD04G1142900	2	0	0.534816	1.87187	0.386772
MD10G1321600	1	0	-1.16549	0.139275	-0.735695			MD05G1314900	2	0	0.882115	2.16603	0.430942
MD02G1174600	1	0	-1.05572	0.192497	0.0911512			MD09G1050700	2	0	0.308087	1.39029	1.3546
MD05G1150200	1	0	-0.989961	0.3645	-0.210607			MD07G1246100	2	0	0.22126	1.42333	1.03055
MD04G1234900	1	0	-1.13146	0.0546561	-0.549194			MD13G1009300	2	0	0.935815	1.77562	0.92159
MD01G1087800	1	0	-1.13568	0.192264	-0.825353			MD17G1267700	2	0	0.366608	1.81015	0.610662
MD03G1272000	1	0	-0.307023	-0.108715	-0.724274			MD11G1138100	2	0	1.1875	0.881627	2.17411
MD08G1230700	1	0	-1.13267	0.664874	-1.01383			MD05G1104700	2	0	0.537714	2.06245	1.14479
MD15G1360600	1	0	-0.861603	-0.478103	-1.34324			MD16G1160500	2	0	0.781237	3.13661	2.42009
MD00G1055400	1	0	-1.49903	0.801462	0.0739697			MD02G1001300	2	0	0.584626	1.40824	0.832298
MD01G1160900	1	0	-1.42449	-0.161219	0.512839			MD07G1268800	2	0	0.929916	1.72508	1.26275
MD06G1196700	1	0	-0.948929	0.0532161	-0.159882			MD10G1286300	2	0	1.51495	2.36739	1.30883
MD15G1264100	1	0	-0.895057	0.163373	-0.641413			MD08G1214100	2	0	1.73259	2.96296	1.93639
MD17G1119600	1	0	-0.849401	-0.0163776	-0.431287			MD04G1154400	2	0	1.00306	2.19638	0.800624
MD14G1187600	1	0	-0.614363	-0.121039	-0.67077			MD13G1161700	2	0	1.9325	2.97868	1.77115
MD05G1295800	1	0	-0.602775	0.80026	-0.268163			MD11G1242900	2	0	0.445931	1.76993	1.49985
MD14G1078100	1	0	-1.2463	0.34185	-0.748571			MD10G1258100	2	0	0.264727	1.39613	0.941477
MD15G1156900	1	0	-1.36642	0.413801	-0.416423			MD07G1264100	2	0	1.17233	2.03389	2.0768
MD05G1122100	1	0	-1.84613	-0.505773	-0.4405			MD15G1039500	2	0	1.06734	1.35032	0.619184
MD01G1191000	1	0	-1.39068	0.411344	-0.209734			MD04G1065600	2	0	0.679885	1.67854	1.23101
MD11G1227900	1	0	-0.651666	0.285646	-0.670833			MD10G1288000	2	0	0.923507	1.64932	0.954646
MD04G1221500	1	0	-0.372735	0.0181297	-0.609897			MD16G1208400	2	0	1.16275	1.40628	1.18394
MD11G1110100	1	0	-0.393859	0.650146	-0.233383			MD09G1145900	2	0	0.311142	1.34857	1.08406
MD04G1110800	1	0	-0.6626	-0.0543639	-1.02475			MD13G1206000	2	0	0.772122	2.07511	2.47548
MD14G1063300	1	0	-0.543491	0.22495	-0.398429			MD06G1128400	2	0	0.546472	1.6642	0.637917
MD17G1247700	1	0	-0.36625	0.121623	-0.919359			MD17G1259400	2	0	0.575956	1.37185	1.04731
MD04G1066800	1	0	-1.13996	0.559972	-0.288516			MD10G1126100	2	0	0.669914	1.68627	1.49836
MD03G1290900	1	0	-0.376028	0.819496	-0.457522			MD02G1136000	2	0	1.02516	0.805752	1.76709
MD05G1347300	1	0	-0.659922	0.154243	-1.33075			MD14G1230300	2	0	0.888679	1.59865	1.04663
MD09G1066700	1	0	-1.65622	0.961443	-0.400554			MD11G1258400	2	0	0.887616	1.34445	0.646936
MD09G1279500	1	0	-0.670143	0.188939	-1.22941			MD09G1141500	2	0	1.86465	2.7544	1.17868
MD05G1132400	1	0	-0.8768	0.482564	-0.353386			MD17G1010300	2	0	1.26858	1.75247	1.52374
MD11G1084900	1	0	-0.719712	-0.213253	-1.96237			MD05G1262600	2	0	1.51669	2.85974	2.2425
MD09G1135900	1	0	-0.0409794	0.361891	-0.520809			MD04G1209700	2	0	0.840086	1.55928	0.86866
MD17G1190800	1	0	-0.444784	0.490575	-0.15697			MD15G1072700	2	0	0.744097	1.12001	1.56015
MD01G1018600	1	0	-0.583586	-0.581319	-0.264509			MD16G1158100	2	0	1.26666	1.11263	2.49059
MD16G1158300	1	0	-0.494057	0.974186	-0.517522			MD15G1066400	2	0	0.535023	1.32087	0.790534
MD10G1216200	1	0	-1.29123	-0.150798	-0.176168			MD09G1153200	2	0	0.0818025	1.19912	0.947379
MD05G1080700	1	0	-0.661055	-0.195154	-0.659041			MD07G1043500	2	0	0.838741	1.7187	1.02157
MD03G1023400	1	0	-1.17545	0.625294	-0.78383			MD04G1103300	2	0	0.946382	0.850703	1.78179
MD07G1288000	1	0	-1.48982	0.916601	-0.521863			MD15G1420900	2	0	0.650302	1.59024	1.14599
MD12G1191600	1	0	-0.808765	0.170331	-0.757846			MD04G1134900	2	0	0.546701	1.00269	0.992221
MD11G1308700	1	0	-0.978381	1.03844	-0.581509			MD11G1134500	2	0	1.03875	1.75209	1.51595
MD08G1099600	1	0	-0.214764	0.243344	-0.973571			MD15G1249600	2	0	0.9938	1.00206	2.07129
MD12G1027300	1	0	-1.0305	0.186025	-0.697895			MD06G1077700	2	0	1.35113	1.81213	0.517614
MD12G1160400	1	0	-0.70022	-0.37004	-1.4414			MD04G1169400	2	0	0.431003	1.27285	0.815175
MD06G1229600	1	0	-1.42483	0.510125	-0.86191			MD11G1235500	2	0	0.810845	2.01571	1.46595
MD11G1017400	1	0	-0.53384	0.42904	-0.56964			MD15G1043100	2	0	1.16769	2.15878	1.29272
MD16G1164600	1	0	-0.663573	0.263869	-0.331701			MD01G1158800	2	0	0.146933	1.67096	0.736405
MD16G1133600	1	0	-0.28968	0.631886	-1.04781			MD00G1105300	2	0	1.35632	3.20202	1.14552
MD10G1237300	1	0	-0.756365	0.432365	-0.343973			MD08G1059500	2	0	0.95253	1.41672	0.916137
MD08G1017600	1	0	-0.909086	0.459944	-0.632658			MD15G1170100	2	0	0.939825	3.19672	2.14643
MD07G1091400	1	0	-0.902814	-0.395823	-0.103727			MD08G1040700	2	0	0.605631	1.74247	0.892639
MD03G1022700	1	0	-0.966372	0.00919642	-0.739417			MD09G1261400	2	0	0.165987	1.14751	1.08838
MD14G1097400	1	0	-0.565581	0.087266	-0.47035			MD13G1051300	2	0	0.830031	2.56535	0.667634
MD10G1101200	1	0	-0.815766	0.288653	-0.247826			MD11G1214800	2	0	1.17732	3.70351	1.89447
MD05G1332000	1	0	-1.20255	0.437836	-0.609348			MD15G1374500	2	0	0.674196	1.90192	0.723602
MD15G1366400	1	0	-0.183913	0.173105	-0.570033			MD02G1134000	2	0	0.300001	1.0875	1.03739
MD09G1223900	1	0	-0.802099	0.256277	-0.856864			MD05G1204700	2	0	0.732815	1.61848	0.692478
MD11G1221500	1	0	-1.57581	0.212298	0.222239			MD09G1011400	2	0	1.15866	1.36075	0.819143
MD16G1088200	1	0	-0.745163	0.460458	-0.236435			MD05G1112600	2	0	0.907493	2.05884	1.53687
MD02G1176500	1	0	-0.881369	0.273374	-0.792752			MD11G1054600	2	0	0.379336	1.71299	0.781643
MD04G1005800	1	0	0.00691909	-0.272287	-1.0171			MD06G1014000	2	0	0.993674	1.45354	1.03338
MD03G1031900	1	0	-1.014	-0.058684	-0.14292			MD05G1169600	2	0	0.570856	3.05993	1.98704
MD17G1222300	1	0	-0.923594	-0.0653362	-0.603917			MD05G1348200	2	0	0.896782	1.54275	0.442195
MD01G1094000	1	0	-1.0615	1.0102	-0.631774			MD14G1171600	2	0	0.664359	1.87385	0.939068
MD14G1133300	1	0	-2.10933	-0.153092	0.587015			MD04G1204500	2	0	0.841393	1.41461	1.48834
MD05G1287300	1	0	-2.08556	-0.454009	-0.237563			MD13G1131300	2	0	1.11475	0.585923	2.16091
MD15G1281000	1	0	-0.638438	-0.0117695	-0.66961			MD12G1174700	2	0	0.323281	1.22451	1.31911
MD05G1298000	1	0	-1.38396	0.381542	-0.710686			MD11G1036800	2	0	0.45847	1.7857	1.19307
MD09G1261200	1	0	0.0375087	-0.252792	-1.63212			MD12G1157100	2	0	0.363506	1.27463	0.9278
MD03G1090700	1	0	-1.92313	0.0287906	-0.211632			MD08G1062800	2	0	1.03767	0.811364	1.99324
MD15G1010800	1	0	-1.16133	0.150646	-0.805989			MD06G1200200	2	0	0.875878	1.23094	1.15438
MD01G1012600	1	0	-0.855493	0.685326	-0.679918			MD07G1011000	2	0	0.679257	1.14338	1.28415
MD03G1105700	1	0	-0.638205	0.119449	-0.377425			MD16G1015400	2	0	0.0961758	1.40554	1.13835
MD10G1289500	1	0	-1.53897	0.224578	-0.209973			MD13G1184700	2	0	1.04924	1.75409	0.60839
MD16G1200300	1	0	-0.916503	-0.2248	-0.365172			MD10G1129900	2	0	0.898515	1.00965	1.77412
MD10G1264700	1	0	-1.08718	0.119678	-0.396964			MD05G1191100	2	0	1.18203	1.80386	0.547985
MD11G1035700	1	0	-0.998946	-0.253597	-0.109195			MD03G1274200	2	0	0.796442	1.45825	0.354045
MD05G1343500	1	0	-0.858832	0.31011	-1.13562			MD16G1239900	2	0	1.37868	1.69021	1.11482
MD12G1223800	1	0	-0.638555	0.0217094	-0.462585			MD15G1150300	2	0	1.36388	0.97442	2.46236
MD15G1221400	1	0	-0.640587	0.542222	-1.10646			MD03G1257500	2	0	0.972259	1.94251	0.82119
MD06G1134800	1	0	-0.479201	-0.262255	-0.574826			MD10G1032000	2	0	1.80341	2.93844	1.76614
MD07G1099600	1	0	-0.858978	0.0412221	-0.467993			MD01G1218100	2	0	0.934622	1.00071	1.86995
MD02G1241700	1	0	-0.522626	0.457562	-0.40246			MD02G1216900	2	0	0.975464	1.50372	0.986538
MD13G1136900	1	0	-0.865948	0.112957	-0.591677			MD14G1182700	2	0	1.3603	1.18885	1.3927
MD02G1073500	1	0	-1.68054	0.0124499	-0.539457			MD12G1161300	2	0	1.61585	1.50181	0.993536
MD02G1247400	1	0	-1.18543	0.522696	0.0231318			MD11G1112600	2	0	-0.0213543	1.79971	1.01128
MD10G1081600	1	0	-1.20835	0.0239271	-0.209933			MD13G1086300	2	0	1.69821	2.05494	0.906176
MD15G1034300	1	0	-0.166389	0.00782676	-0.598452			MD10G1115100	2	0	1.00369	1.88463	1.59134
MD03G1073800	1	0	-0.957165	0.339063	-0.593899			MD11G1113900	2	0	0.914719	1.72024	1.21624
MD12G1178300	1	0	-1.20167	-0.357963	-0.111483			MD05G1349700	2	0	0.526381	0.998157	1.57147
MD08G1236000	1	0	-0.918513	0.456071	-0.460951			MD15G1078100	2	0	0.807668	1.28491	0.916808
MD00G1181800	1	0	-1.45099	0.0525701	-0.164452			MD05G1189700	2	0	1.44546	1.09445	2.5667
MD05G1264700	1	0	0.0724805	-0.172926	-1.31299			MD10G1258000	2	0	1.21011	2.33763	1.59222
MD16G1111200	1	0	-0.698059	0.271832	-0.515024			MD17G1090100	2	0	1.24594	2.01895	0.386812
MD16G1139700	1	0	-0.938136	-0.054254	-0.564833			MD13G1039900	2	0	0.252916	1.47076	1.52057
MD17G1038400	1	0	-1.72769	0.334463	0.0821948			MD07G1155300	2	0	0.577284	1.67619	0.913748
[truncated: 6,017 more rows]
